# Supplementary material for: Application of Long-Chained Auxin Conjugates Influenced Auxin Metabolism and Transcriptome Response in Brassica rapa L. ssp. pekinensis
Source: Int J Mol Sci. 2023 Dec 28;25(1):447. doi: 10.3390/ijms25010447 (PMC10778880; doi:10.3390/ijms25010447)
Supplement: Supplementary file 1 [file ijms-25-00447-s001.zip]

Archive with 4 entries (4 files):
- Suplementary figures_rev_12_2023.pdf
- Table S1.xlsx
- Table S2.xlsx
- Table S3.xlsx
