# Supplementary material for: Application of Long-Chained Auxin Conjugates Influenced Auxin Metabolism and Transcriptome Response in Brassica rapa L. ssp. pekinensis
Source: Int J Mol Sci. 2023 Dec 28;25(1):447. doi: 10.3390/ijms25010447 (PMC10778880; doi:10.3390/ijms25010447)
Supplement: Supplementary file 1 [file ijms-25-00447-s001.zip › Table S1.xlsx]

## Sheet: DESeq2_iaa_new-resultsSignifica
	gene	baseMean	log2FoldChange	lfcSE	stat	pvalue	padj	Control1	Control2	IAA-Ala1	IAA-Ala2
1	BraA02g001260.3C	112.046	-8.88129	1.50903	-5.88542	3.97056e-09	1.20238e-06	240.213	207.023	0	0.946391
2	BraA03g038620.3C	21.5937	-4.87794	1.20674	-4.04226	5.29381e-05	0.0043327	49.9644	33.5713	0	2.83917
3	BraA06g000940.3C	29.2598	-4.56467	0.988094	-4.61967	3.84351e-06	0.000477502	45.1601	67.1426	0.951052	3.78556
4	BraA03g026020.3C	38.671	-4.47953	0.865129	-5.17787	2.24428e-07	4.18231e-05	93.2028	54.8331	4.75526	1.89278
5	BraA02g001050.3C	23.1836	-4.21157	1.02738	-4.09934	4.14322e-05	0.00352188	36.5124	51.476	2.85316	1.89278
6	BraA03g038630.3C	218.748	-3.45621	0.431992	-8.00063	1.23781e-15	2.14194e-12	465.053	336.832	47.5526	25.5525
7	BraA06g000980.3C	209.974	-3.35125	0.568942	-5.89031	3.85475e-09	1.18209e-06	601.495	163.38	52.3079	22.7134
8	BraA02g005650.3C	65.265	-3.20283	0.78664	-4.07153	4.6706e-05	0.00390173	105.694	129.809	0.951052	24.6062
9	BraA05g003670.3C	61.2278	-3.16283	0.779998	-4.05492	5.01517e-05	0.00413257	177.758	42.5236	4.75526	19.8742
10	BraA04g011920.3C	46.1397	-3.12495	0.672593	-4.64611	3.38246e-06	0.000431281	74.9466	90.6425	8.55947	10.4103
11	BraA04g017420.3C	293.988	-3.02114	0.424374	-7.11906	1.08665e-12	9.75003e-10	710.071	336.832	69.4268	59.6226
12	BraA09g004340.3C	146.463	-2.96671	0.45968	-6.45386	1.09038e-10	5.22506e-08	270.961	248.428	43.7484	22.7134
13	BraA03g003010.3C	183.227	-2.9585	0.460359	-6.42651	1.30563e-10	6.08274e-08	351.673	297.665	58.9652	24.6062
14	BraA03g034150.3C	38.7775	-2.84352	0.73196	-3.88481	0.00010241	0.00749545	63.4164	72.7378	5.70631	13.2495
15	BraA10g022740.3C	93.43	-2.78533	0.605964	-4.59652	4.29609e-06	0.000521569	220.036	106.309	11.4126	35.9628
16	BraA03g003000.3C	139.679	-2.75471	0.435863	-6.32013	2.61347e-10	1.07312e-07	259.431	227.166	39.9442	32.1773
17	BraA02g003380.3C	70.7216	-2.7338	0.590785	-4.6274	3.70289e-06	0.000462403	123.95	121.976	10.4616	26.4989
18	BraA10g027700.3C	101.725	-2.5924	0.515406	-5.02982	4.90942e-07	8.38422e-05	143.167	205.904	19.9721	37.8556
19	BraA04g015380.3C	643.965	-2.4751	0.358149	-6.91083	4.81813e-12	3.76529e-09	856.121	1327.19	153.119	239.437
20	BraA09g005630.3C	187.653	-2.44171	0.417849	-5.84352	5.11096e-09	1.50998e-06	370.89	262.975	69.4268	47.3195
21	BraA08g035120.3C	1332.94	-2.39114	0.43662	-5.47649	4.33853e-08	9.55503e-06	2652.92	1825.16	203.525	650.17
22	BraA01g009570.3C	150.465	-2.25497	0.517601	-4.35658	1.32113e-05	0.00132804	369.929	127.571	52.3079	52.0515
23	BraA05g017760.3C	146.271	-2.25492	0.518898	-4.34558	1.38906e-05	0.00137919	324.769	158.904	30.4337	70.9793
24	BraA05g015160.3C	84.8471	-2.25352	0.542553	-4.15354	3.2737e-05	0.00289558	158.541	121.976	39.9442	18.9278
25	BraA03g028320.3C	1541.96	-2.25171	0.363621	-6.19246	5.92337e-10	2.20769e-07	3289	1808.37	405.148	665.313
26	BraA07g025400.3C	259.065	-2.14781	0.419952	-5.11442	3.147e-07	5.60583e-05	486.192	359.213	128.392	62.4618
27	BraA02g006880.3C	403.823	-2.13055	0.485796	-4.38569	1.15618e-05	0.001197	706.228	608.759	60.8673	239.437
28	BraA06g032440.3C	335.267	-2.10937	0.369035	-5.7159	1.09126e-08	2.97045e-06	462.171	626.664	100.812	151.422
29	BraA03g046230.3C	128.289	-2.07227	0.478487	-4.33088	1.48514e-05	0.00145664	214.27	200.309	31.3847	67.1937
30	BraA02g035380.3C	652.428	-1.95928	0.491942	-3.98275	6.81233e-05	0.00530661	1679.57	396.141	240.616	293.381
31	BraA05g036590.3C	159.256	-1.83525	0.464043	-3.95491	7.65643e-05	0.0057964	192.171	305.499	47.5526	91.7999
32	BraA04g012140.3C	274.901	-1.8202	0.429149	-4.24143	2.22102e-05	0.00206155	593.808	262.975	111.273	131.548
33	BraA02g039880.3C	830.279	-1.81079	0.329171	-5.50107	3.77492e-08	8.62748e-06	1185.69	1398.8	452.701	283.917
34	BraA10g024990.3C	420.414	-1.79505	0.463708	-3.87107	0.000108358	0.00788313	593.808	711.711	85.5947	290.542
35	BraA07g028670.3C	103.04	-1.75977	0.461427	-3.81376	0.000136871	0.00931412	147.011	171.214	49.4547	44.4804
36	BraA10g030360.3C	309.158	-1.74449	0.455268	-3.8318	0.000127211	0.00885577	570.747	381.594	76.0842	208.206
37	BraA07g030970.3C	238.698	-1.74055	0.395927	-4.39613	1.10198e-05	0.00116072	417.011	317.808	83.6926	136.28
38	BraA10g012360.3C	1922.17	-1.73604	0.394172	-4.40427	1.06141e-05	0.00113777	3783.84	2129.54	554.463	1220.84
39	BraA07g014340.3C	257.682	-1.72888	0.410126	-4.21549	2.49231e-05	0.00227716	396.833	395.022	77.9863	160.886
40	BraA10g019590.3C	674.864	-1.72486	0.392648	-4.3929	1.11847e-05	0.00117299	664.911	1407.76	250.127	376.663
41	BraA10g023420.3C	188.126	-1.68845	0.434405	-3.88681	0.000101571	0.00745653	311.317	262.975	58.9652	119.245
42	BraA09g025580.3C	256.842	-1.64829	0.393644	-4.18727	2.82328e-05	0.00254052	490.035	288.713	136	112.62
43	BraA07g011060.3C	324.258	-1.63705	0.424886	-3.85291	0.00011672	0.00829228	564.021	417.403	94.1542	221.455
44	BraA07g014010.3C	635.839	-1.61475	0.309004	-5.22566	1.73536e-07	3.31031e-05	901.281	1016.09	278.658	347.325
45	BraA05g007450.3C	593.343	-1.58161	0.356266	-4.4394	9.02088e-06	0.00100248	994.484	784.449	214.938	379.503
46	BraA06g035270.3C	469.904	-1.57811	0.347129	-4.54616	5.46332e-06	0.000639393	821.53	586.379	275.805	195.903
47	BraA03g020070.3C	2311.9	-1.57261	0.3221	-4.88237	1.04818e-06	0.00016174	2604.87	4316.15	1033.79	1292.77
48	BraA01g012700.3C	400.127	-1.53047	0.332998	-4.59604	4.30586e-06	0.000521569	636.085	552.807	179.749	231.866
49	BraA01g006200.3C	738.773	-1.51951	0.346317	-4.38762	1.14597e-05	0.00119152	1027.15	1163.8	273.903	490.23
50	BraA10g023580.3C	364.497	-1.5183	0.381507	-3.97975	6.89889e-05	0.0053397	675.48	405.094	153.119	224.295
51	BraA03g049900.3C	226.089	-1.51458	0.382409	-3.96062	7.47555e-05	0.00572015	321.886	348.022	140.756	93.6927
52	BraA07g016040.3C	1636.33	-1.49426	0.358813	-4.16445	3.12098e-05	0.00277974	2571.24	2259.35	548.757	1165.95
53	BraA09g025690.3C	226.938	-1.48469	0.383627	-3.87013	0.000108777	0.00788991	328.612	340.189	94.1542	144.798
54	BraA09g010100.3C	602.159	-1.48308	0.370042	-4.00788	6.12664e-05	0.00486636	1175.12	598.688	344.281	290.542
55	BraA01g022500.3C	461.678	-1.47173	0.32055	-4.59126	4.40569e-06	0.000531006	741.779	615.474	229.204	260.257
56	BraA06g024940.3C	417.227	-1.46932	0.339894	-4.32287	1.5401e-05	0.00149841	668.754	557.283	184.504	258.365
57	BraA08g011460.3C	375.976	-1.44032	0.356073	-4.04502	5.23176e-05	0.00429643	673.559	425.236	204.476	200.635
58	BraA02g005190.3C	1226.17	-1.43527	0.37656	-3.81153	0.000138108	0.00934581	1925.55	1655.06	400.393	923.677
59	BraA09g025060.3C	859.222	-1.39198	0.324436	-4.29046	1.78306e-05	0.00169398	1483.56	1004.9	415.61	532.818
60	BraA08g009740.3C	656.927	-1.3807	0.338478	-4.07914	4.52021e-05	0.00380231	954.128	944.472	272.001	457.107
61	BraA09g042420.3C	2020.18	-1.36726	0.331621	-4.12295	3.7405e-05	0.00324794	3290.92	2532.39	826.464	1430.94
62	BraA07g037640.3C	5496.57	-1.35556	0.354046	-3.82877	0.000128787	0.0089143	10687.6	5120.74	2689.58	3488.4
63	BraA09g054640.3C	905.034	-1.33659	0.325719	-4.1035	4.06955e-05	0.00347144	1424.95	1168.28	401.344	625.564
64	BraA07g019510.3C	14453	-1.33259	0.344578	-3.86732	0.000110039	0.00793391	24510.4	16870.7	5688.24	10742.5
65	BraA05g032830.3C	13570.1	-1.3168	0.347413	-3.7903	0.000150463	0.00989009	13972.7	24759.9	5911.74	9636.15
66	BraA09g000130.3C	799.936	-1.30575	0.332927	-3.92204	8.78026e-05	0.00656514	1238.54	1039.59	350.938	570.674
67	BraA06g032410.3C	588.413	-1.28261	0.316194	-4.05641	4.98332e-05	0.00412034	886.868	781.092	295.777	389.913
68	BraA07g018580.3C	853.503	-1.27615	0.327147	-3.90086	9.58534e-05	0.00705819	1187.62	1228.71	618.184	379.503
69	BraA02g011680.3C	3614.81	-1.26678	0.305218	-4.15043	3.31851e-05	0.00292343	4003.88	6210.69	1957.27	2287.43
70	BraA01g014290.3C	10877.9	-1.25362	0.268856	-4.6628	3.11929e-06	0.00040785	15022	15633	7102.46	5754.05
71	BraA01g002170.3C	761.393	-1.25344	0.329552	-3.80348	0.000142679	0.00952214	1310.6	834.806	415.61	484.552
72	BraA08g018700.3C	560.389	-1.25153	0.320659	-3.90299	9.50121e-05	0.00701757	729.288	849.354	283.414	379.503
73	BraA09g046920.3C	516.801	-1.24945	0.309285	-4.0398	5.34962e-05	0.00436363	704.306	750.878	326.211	285.81
74	BraA04g030230.3C	10958.9	-1.22253	0.316673	-3.86055	0.000113133	0.00810874	17412.6	13273	4972.1	8177.76
75	BraA04g027190.3C	1112	-1.21443	0.312697	-3.88373	0.000102867	0.00750622	1251.03	1857.61	622.939	716.418
76	BraA08g007700.3C	639.428	-1.20876	0.300532	-4.02207	5.76884e-05	0.00465707	839.786	945.591	402.295	370.039
77	BraA03g064230.3C	1695.02	-1.18112	0.307321	-3.84327	0.000121405	0.00854988	2088.9	2616.32	847.387	1227.47
78	BraA06g010230.3C	2335.64	-1.12777	0.292474	-3.85595	0.000115282	0.00821417	3755.98	2653.25	1443.7	1489.62
79	BraA08g003560.3C	2546.18	-1.09378	0.280143	-3.90434	9.44809e-05	0.00699968	3319.75	3615.63	1433.24	1816.12
80	BraA08g024150.3C	6619.72	-1.02553	0.267738	-3.83035	0.000127962	0.00888256	9615.26	8141.04	4189.38	4533.21
81	BraA09g051010.3C	2449.75	1.13168	0.284201	3.98196	6.83491e-05	0.00530714	1377.86	1693.11	3692.94	3035.07
82	BraA01g013540.3C	547.619	1.1936	0.312218	3.82299	0.000131845	0.00904837	308.434	358.094	825.513	698.436
83	BraA05g020590.3C	517.608	1.20936	0.315166	3.8372	0.000124445	0.00871332	287.295	337.951	781.765	663.42
84	BraA07g040570.3C	12902	1.2265	0.309698	3.96032	7.48488e-05	0.00572015	7845.37	7606.14	22711.1	13445.4
85	BraA03g038570.3C	2224.28	1.23388	0.32312	3.81865	0.000134184	0.009157	1181.85	1472.66	3903.12	2339.48
86	BraA04g024790.3C	870.915	1.24191	0.297046	4.18086	2.90403e-05	0.00259606	494.84	540.498	1353.35	1094.97
87	BraA08g019420.3C	7489.59	1.24919	0.279768	4.4651	8.00311e-06	0.000905997	4852.31	4018.48	11797.8	9289.77
88	BraA09g022980.3C	1033.6	1.25277	0.317262	3.94868	7.85828e-05	0.00591226	583.238	638.974	1764.2	1147.97
89	BraA02g026160.3C	848.796	1.26432	0.307853	4.10688	4.01039e-05	0.00344523	525.587	472.236	1382.83	1014.53
90	BraA10g021480.3C	1255.31	1.28881	0.339909	3.79164	0.000149654	0.00987882	588.043	870.615	2197.88	1364.7
91	BraA04g015930.3C	1837.59	1.30014	0.295611	4.39812	1.09191e-05	0.00115514	1115.55	1007.14	3047.17	2180.48
92	BraA03g025870.3C	320	1.30438	0.343854	3.79342	0.000148588	0.00983525	178.719	190.237	511.666	399.377
93	BraA01g033880.3C	1626.31	1.30947	0.283738	4.61508	3.92939e-06	0.000483215	839.786	1030.64	2196.93	2437.9
94	BraA09g038640.3C	1001.03	1.31376	0.299301	4.38943	1.13646e-05	0.00118672	497.722	651.283	1511.22	1343.87
95	BraA04g012330.3C	4912.19	1.31407	0.28384	4.62961	3.66349e-06	0.000461332	2942.13	2693.54	8085.85	5927.24
96	BraA03g029500.3C	550.741	1.32036	0.34838	3.79001	0.000150642	0.00989009	249.822	380.475	917.765	654.902
97	BraA07g004830.3C	1143.88	1.32674	0.35018	3.78873	0.000151417	0.00991416	857.082	446.498	1793.68	1478.26
98	BraA02g016410.3C	1398.71	1.33223	0.315167	4.22706	2.3676e-05	0.00217263	648.576	942.234	2282.53	1721.48
99	BraA05g000260.3C	2701.65	1.33735	0.278663	4.79915	1.59344e-06	0.000227075	1411.49	1652.83	4219.82	3522.47
100	BraA06g000800.3C	317.553	1.34872	0.345255	3.90643	9.36694e-05	0.00696084	169.11	189.118	510.715	401.27
101	BraA10g017310.3C	1129.61	1.35826	0.329602	4.1209	3.77388e-05	0.00326521	576.512	691.569	2026.69	1223.68
102	BraA03g016690.3C	8819.1	1.36803	0.30914	4.42529	9.63115e-06	0.0010477	4385.34	5465.41	15622	9803.66
103	BraA04g026210.3C	399.924	1.3704	0.359946	3.80725	0.000140519	0.00940391	197.936	248.428	707.583	445.75
104	BraA10g029540.3C	5458.36	1.37921	0.311686	4.425	9.64405e-06	0.0010477	2616.41	3446.65	9601.82	6168.57
105	BraA03g056710.3C	1122.88	1.39298	0.310163	4.4911	7.0855e-06	0.000813522	570.747	668.069	1921.13	1331.57
106	BraA01g044050.3C	1004.79	1.40158	0.293245	4.77957	1.75672e-06	0.000245022	605.338	497.974	1545.46	1370.37
107	BraA05g014510.3C	445.705	1.40493	0.36401	3.85958	0.000113581	0.00811686	196.975	292.07	784.618	509.158
108	BraA05g032690.3C	313.998	1.40788	0.353111	3.98709	6.68883e-05	0.00526115	153.737	190.237	517.372	394.645
109	BraA03g025980.3C	2555.31	1.41393	0.369649	3.82507	0.000130737	0.00902343	910.889	1878.87	4523.2	2908.26
110	BraA08g033380.3C	306.283	1.41613	0.372682	3.79983	0.000144793	0.00963672	181.601	152.19	546.855	344.486
111	BraA06g038800.3C	399.406	1.43061	0.324691	4.40606	1.05267e-05	0.00113342	200.818	231.642	611.527	553.638
112	BraA05g013260.3C	1011.76	1.43353	0.303817	4.7184	2.37709e-06	0.000329071	549.608	543.855	1716.65	1236.93
113	BraA09g022500.3C	1117.53	1.43485	0.308539	4.65048	3.31161e-06	0.000426905	698.541	508.046	1814.61	1448.92
114	BraA10g021470.3C	2014.4	1.44656	0.364182	3.97209	7.12449e-05	0.0054793	711.993	1451.4	3494.17	2400.05
115	BraA03g031000.3C	1629.38	1.45072	0.336316	4.31356	1.6065e-05	0.00155056	814.804	931.044	3083.31	1688.36
116	BraA03g040420.3C	1721.92	1.45336	0.332843	4.36652	1.26241e-05	0.00127963	714.875	1128	3011.98	2032.85
117	BraA03g060680.3C	421.845	1.45477	0.37922	3.83621	0.000124947	0.00872324	188.327	262.975	791.275	444.804
118	BraA10g031270.3C	1089.39	1.45786	0.29917	4.87301	1.09909e-06	0.000166715	562.099	600.926	1830.78	1363.75
119	BraA06g004920.3C	853.835	1.45899	0.333221	4.37846	1.19519e-05	0.0012269	539.039	371.522	1479.84	1024.94
120	BraA09g041490.3C	503.085	1.46032	0.327354	4.46097	8.15883e-06	0.000919329	241.174	295.427	836.926	638.814
121	BraA07g041230.3C	403.502	1.46516	0.358611	4.08564	4.39547e-05	0.00371027	185.445	243.951	717.093	467.517
122	BraA07g022130.3C	618.198	1.46689	0.336191	4.36326	1.2814e-05	0.00129346	262.313	395.022	1022.38	793.075
123	BraA01g044040.3C	1803.67	1.48326	0.296675	4.99961	5.74456e-07	9.58536e-05	989.679	910.901	3110.89	2203.2
124	BraA07g042420.3C	789.617	1.48456	0.352988	4.20571	2.60268e-05	0.00236152	316.121	515.879	1400.9	925.57
125	BraA09g051000.3C	2493.04	1.49285	0.37462	3.98497	6.74892e-05	0.00529124	796.548	1818.44	4235.04	3122.14
126	BraA09g046380.3C	451.553	1.50097	0.36195	4.14689	3.37015e-05	0.00295816	171.032	301.023	720.898	613.261
127	BraA09g038140.3C	838.125	1.51182	0.377155	4.00847	6.11138e-05	0.00486636	318.043	552.807	1588.26	893.393
128	BraA09g017590.3C	379.255	1.51438	0.34121	4.43825	9.06913e-06	0.00100324	200.818	192.475	652.422	471.302
129	BraA06g004930.3C	1505.25	1.51643	0.379828	3.99242	6.54017e-05	0.00516098	522.704	1037.35	2823.67	1637.26
130	BraA07g021000.3C	10332.1	1.52349	0.312937	4.86836	1.12527e-06	0.000169322	4673.59	5992.48	18953.5	11708.7
131	BraA09g020370.3C	462.421	1.5244	0.36168	4.21477	2.50031e-05	0.00227716	171.032	306.618	724.702	647.331
132	BraA02g023100.3C	370.013	1.53114	0.386833	3.95815	7.55327e-05	0.00575427	140.285	240.594	663.834	435.34
133	BraA05g001540.3C	665.758	1.53329	0.402487	3.80954	0.000139223	0.0093943	332.455	351.38	1411.36	567.834
134	BraA06g003110.3C	2367.69	1.53563	0.355469	4.32001	1.56019e-05	0.00151188	808.078	1621.49	4063.85	2977.34
135	BraA06g044870.3C	1369.72	1.5375	0.316563	4.85685	1.1927e-06	0.000176185	717.758	685.973	2505.07	1570.06
136	BraA03g033670.3C	463.278	1.53938	0.333541	4.61526	3.92595e-06	0.000483215	260.391	213.737	791.275	587.709
137	BraA04g018060.3C	794.191	1.53986	0.370742	4.15345	3.27494e-05	0.00289558	271.922	541.617	1369.52	993.71
138	BraA03g004550.3C	1648.66	1.54416	0.316238	4.8829	1.04537e-06	0.00016174	671.637	1012.73	2784.68	2125.59
139	BraA01g044260.3C	308.736	1.55218	0.36011	4.31031	1.63029e-05	0.00156727	188.327	125.333	477.428	443.857
140	BraA03g051680.3C	189.028	1.55381	0.409558	3.79386	0.000148323	0.00983525	82.6334	109.666	337.624	226.187
141	BraA02g041320.3C	1347.06	1.55661	0.320293	4.85996	1.17407e-06	0.000174497	640.89	726.259	2481.29	1539.78
142	BraA05g036610.3C	765.555	1.55722	0.325584	4.78284	1.72835e-06	0.000243436	408.363	368.165	1383.78	901.91
143	BraA05g034710.3C	649.755	1.55821	0.325263	4.79063	1.66259e-06	0.000235544	285.374	373.76	1114.63	825.253
144	BraA03g000240.3C	324.318	1.56501	0.395591	3.95612	7.61765e-05	0.00578512	135.48	192.475	622.939	346.379
145	BraA05g007840.3C	226.625	1.56845	0.394453	3.97627	7.00038e-05	0.00540099	98.9679	129.809	408.001	269.721
146	BraA08g010080.3C	208.769	1.57036	0.411935	3.81216	0.000137758	0.00934581	101.851	108.547	398.491	226.187
147	BraA04g028020.3C	534.36	1.58423	0.392728	4.0339	5.48583e-05	0.00444481	182.562	352.499	993.849	608.529
148	BraA03g021370.3C	272.029	1.58482	0.400862	3.95354	7.70041e-05	0.00581153	164.306	107.428	506.911	309.47
149	BraA09g012460.3C	227.308	1.59251	0.413575	3.85059	0.000117835	0.00834696	91.2811	135.404	427.022	255.525
150	BraA06g037770.3C	741.655	1.59407	0.316937	5.02963	4.91438e-07	8.38422e-05	433.345	304.38	1187.86	1041.03
151	BraA06g040710.3C	3797.99	1.59584	0.321057	4.97057	6.67561e-07	0.000110016	1521.03	2255.99	6864.69	4550.25
152	BraA05g001270.3C	1299.59	1.59683	0.343386	4.65025	3.31532e-06	0.000426905	526.548	765.425	2449.91	1456.5
153	BraA03g023660.3C	292.852	1.59711	0.419312	3.80888	0.0001396	0.0093943	98.9679	192.475	543.051	336.915
154	BraA10g000300.3C	460.752	1.61009	0.376687	4.27434	1.91704e-05	0.00180008	178.719	276.404	869.262	518.622
155	BraA10g014240.3C	1738.4	1.61783	0.302692	5.3448	9.05181e-08	1.81231e-05	731.21	978.044	2977.74	2266.61
156	BraA07g005400.3C	206.115	1.62598	0.399163	4.07347	4.63179e-05	0.00388269	99.9288	101.833	380.421	242.276
157	BraA05g000150.3C	750.48	1.62816	0.346786	4.69499	2.66618e-06	0.000360843	319.964	414.046	1424.68	843.234
158	BraA03g028510.3C	589.791	1.6383	0.333733	4.90902	9.15349e-07	0.000144936	267.117	306.618	1074.69	710.739
159	BraA09g059510.3C	428.184	1.64169	0.378829	4.33358	1.46702e-05	0.00144472	143.167	273.046	572.533	723.989
160	BraA03g035270.3C	516.094	1.64712	0.401285	4.1046	4.05018e-05	0.00346713	156.619	343.546	930.129	634.082
161	BraA06g012710.3C	2579.41	1.648	0.325501	5.06297	4.12775e-07	7.2463e-05	1138.61	1357.4	4963.54	2858.1
162	BraA06g023210.3C	311.946	1.65188	0.371843	4.4424	8.89607e-06	0.000993511	133.559	167.856	574.435	371.931
163	BraA01g020020.3C	325.025	1.66461	0.388324	4.28666	1.81382e-05	0.00171647	108.576	203.666	544.002	443.857
164	BraA09g011560.3C	677.078	1.67394	0.36004	4.64931	3.33051e-06	0.000426905	238.292	408.451	1225.91	835.663
165	BraA07g018070.3C	299.015	1.68119	0.418066	4.02136	5.78625e-05	0.00465707	98.9679	185.761	570.631	340.701
166	BraA10g032760.3C	874.258	1.69287	0.361759	4.67955	2.8751e-06	0.000382704	545.765	279.761	1513.12	1158.38
167	BraA09g036520.3C	180.598	1.69544	0.393675	4.30669	1.65714e-05	0.00158679	86.4768	83.9282	242.518	309.47
168	BraA08g016290.3C	142.014	1.7037	0.445509	3.82416	0.000131217	0.00903085	73.9857	59.3093	268.197	166.565
169	BraA01g031570.3C	323.057	1.70986	0.425292	4.02044	5.80893e-05	0.00465984	103.772	199.19	638.156	351.111
170	BraA08g019480.3C	605.784	1.71437	0.40079	4.27747	1.89029e-05	0.00178187	174.875	391.665	1112.73	743.863
171	BraA09g005910.3C	3682.97	1.71543	0.353895	4.84729	1.25162e-06	0.000183769	1144.38	2295.16	6569.87	4722.49
172	BraA09g001300.3C	204.708	1.71715	0.444012	3.86735	0.000110022	0.00793391	68.2206	123.095	398.491	229.027
173	BraA07g038650.3C	753.072	1.72472	0.336337	5.12797	2.92881e-07	5.29503e-05	309.395	390.546	1416.12	896.232
174	BraA05g003770.3C	6275.11	1.7333	0.310004	5.59121	2.25492e-08	5.51794e-06	2168.65	3635.77	9667.44	9628.58
175	BraA02g015080.3C	290.084	1.7541	0.364776	4.8087	1.51915e-06	0.000217769	135.48	129.809	530.687	364.36
176	BraA02g014130.3C	468.726	1.75788	0.383196	4.58741	4.48776e-06	0.00053822	215.231	212.618	970.073	476.981
177	BraA05g005890.3C	315.883	1.76154	0.376029	4.68458	2.80539e-06	0.000375488	104.733	183.523	486.939	488.338
178	BraA01g002700.3C	742.614	1.76216	0.316913	5.56041	2.69146e-08	6.39247e-06	301.708	374.879	1314.35	979.514
179	BraA02g011820.3C	661.788	1.77256	0.412953	4.29241	1.76744e-05	0.00168575	273.843	325.642	1478.89	568.781
180	BraA04g017140.3C	1581.2	1.78703	0.333351	5.36081	8.28482e-08	1.67257e-05	514.057	907.544	2696.23	2206.98
181	BraA03g057230.3C	368.997	1.79345	0.441116	4.06571	4.78874e-05	0.00398667	103.772	227.166	755.135	389.913
182	BraA03g059840.3C	2097.21	1.79973	0.364685	4.93503	8.01384e-07	0.000128572	678.363	1194.02	4168.46	2347.99
183	BraA10g009310.3C	540.332	1.80019	0.405713	4.43709	9.11847e-06	0.00100411	189.288	293.189	1148.87	529.979
184	BraA05g004040.3C	855.079	1.80776	0.406941	4.44233	8.8992e-06	0.000993511	526.548	232.761	1688.12	972.889
185	BraA09g057120.3C	1180.31	1.80971	0.320199	5.65184	1.5874e-08	4.04805e-06	618.79	428.593	2117.99	1555.87
186	BraA10g032500.3C	770.222	1.81033	0.413855	4.3743	1.21822e-05	0.00124003	264.235	419.641	1697.63	699.383
187	BraA09g043880.3C	2085.76	1.81188	0.323657	5.59816	2.1664e-08	5.35542e-06	891.672	957.901	4115.2	2378.28
188	BraA02g011840.3C	5947.56	1.81861	0.345126	5.26941	1.36863e-07	2.6739e-05	2400.21	2854.68	12416.9	6118.41
189	BraA01g011610.3C	3046.37	1.8276	0.379497	4.81585	1.46574e-06	0.00021391	972.384	1706.54	6381.56	3124.98
190	BraA03g047600.3C	662.939	1.82796	0.31714	5.76387	8.22059e-09	2.2891e-06	294.021	288.713	1202.13	866.894
191	BraA06g031850.3C	1092.43	1.82977	0.355438	5.14793	2.63377e-07	4.79741e-05	368.968	590.855	2133.21	1276.68
192	BraA09g008560.3C	714.517	1.83722	0.402377	4.56592	4.97314e-06	0.000585578	428.541	195.833	1395.19	838.502
193	BraA10g005490.3C	716.14	1.84533	0.371421	4.96828	6.75486e-07	0.00011057	303.63	320.046	1510.27	730.614
194	BraA02g003760.3C	682.53	1.84562	0.368171	5.01294	5.36049e-07	9.08135e-05	199.858	395.022	1195.47	939.766
195	BraA04g005260.3C	807.79	1.8486	0.404157	4.57396	4.78602e-06	0.000568363	238.292	464.403	1678.61	849.859
196	BraA04g029740.3C	1565.9	1.85617	0.284387	6.52692	6.71372e-11	3.5358e-08	690.854	664.712	2717.16	2190.89
197	BraA09g044930.3C	101.209	1.86204	0.491755	3.78653	0.000152765	0.00997543	55.7295	31.3332	149.315	168.458
198	BraA03g031030.3C	292.248	1.86246	0.376985	4.94042	7.79537e-07	0.0001259	134.52	117.5	563.023	353.95
199	BraA08g019500.3C	171.645	1.86323	0.449833	4.14206	3.44208e-05	0.00301039	57.6512	90.6425	343.33	194.956
200	BraA07g041690.3C	789.674	1.86473	0.368986	5.05367	4.3341e-07	7.55381e-05	423.737	256.261	1565.43	913.267
201	BraA08g035680.3C	392.656	1.8689	0.388399	4.81181	1.4957e-06	0.000216132	194.092	143.238	802.688	430.608
202	BraA02g043500.3C	285.127	1.8691	0.431773	4.3289	1.49856e-05	0.00146387	71.1032	174.571	486.939	407.894
203	BraA01g017010.3C	649.228	1.87899	0.401983	4.6743	2.94962e-06	0.000390479	285.374	269.689	1450.35	591.494
204	BraA02g002870.3C	353.826	1.88489	0.374086	5.03865	4.68827e-07	8.11271e-05	123.95	177.928	675.247	438.179
205	BraA08g029330.3C	6704.54	1.88842	0.315467	5.9861	2.14938e-09	7.0366e-07	2639.47	3063.94	13289.1	7825.7
206	BraA08g002470.3C	255.213	1.89506	0.47293	4.00708	6.14752e-05	0.00486699	106.655	109.666	599.163	205.367
207	BraA03g015480.3C	275.059	1.91785	0.433234	4.42682	9.56315e-06	0.0010477	102.811	127.571	603.918	265.936
208	BraA08g031470.3C	125.353	1.91812	0.435864	4.40073	1.07885e-05	0.00114633	56.6904	48.1188	206.378	190.225
209	BraA03g004450.3C	424.617	1.92288	0.491334	3.91359	9.09351e-05	0.00677845	79.7509	275.285	874.968	468.463
210	BraA10g029550.3C	2446.61	1.92466	0.325741	5.90854	3.45144e-09	1.07198e-06	1210.68	829.211	4705.81	3040.75
211	BraA03g055790.3C	6263.01	1.92679	0.36391	5.29469	1.19218e-07	2.34811e-05	1914.02	3303.41	12967.6	6867.01
212	BraA02g019820.3C	455.676	1.92769	0.379408	5.08079	3.75864e-07	6.64648e-05	147.011	232.761	901.597	541.335
213	BraA06g030090.3C	1223.34	1.93044	0.4293	4.49671	6.90125e-06	0.000796141	718.719	297.665	2623	1253.97
214	BraA03g059440.3C	564.973	1.93469	0.412592	4.6891	2.74407e-06	0.000369322	204.662	264.094	1273.46	517.676
215	BraA07g040190.3C	1137.07	1.93933	0.334305	5.80107	6.58941e-09	1.87806e-06	443.914	496.855	2287.28	1320.21
216	BraA10g017140.3C	432.14	1.93947	0.325935	5.95048	2.67355e-09	8.52229e-07	158.541	199.19	672.394	698.436
217	BraA07g043010.3C	134.546	1.94914	0.47967	4.06349	4.83439e-05	0.00401088	39.395	71.6188	264.392	162.779
218	BraA07g030330.3C	178.369	1.9512	0.460711	4.2352	2.28353e-05	0.00210345	74.9466	71.6188	390.882	176.029
219	BraA01g002570.3C	1935.49	1.96326	0.347098	5.65621	1.54754e-08	3.98838e-06	573.63	1007.14	3707.2	2453.99
220	BraA03g047260.3C	145.406	1.96708	0.480762	4.09158	4.28441e-05	0.00362917	70.1423	48.1188	310.994	152.369
221	BraA09g045510.3C	534.887	1.9682	0.344984	5.70519	1.16216e-08	3.12828e-06	201.779	233.88	1044.26	659.634
222	BraA07g010040.3C	358.464	1.97209	0.43194	4.56566	4.97932e-06	0.000585578	133.559	157.785	816.954	325.558
223	BraA06g040090.3C	522.874	1.97504	0.376177	5.25028	1.51865e-07	2.94326e-05	160.463	264.094	1035.7	631.242
224	BraA10g001720.3C	177.084	1.9795	0.455521	4.34558	1.3891e-05	0.00137919	67.2598	76.0949	383.274	181.707
225	BraA10g027020.3C	679.11	1.9811	0.378013	5.24081	1.5987e-07	3.07381e-05	182.562	367.046	1269.65	897.178
226	BraA08g026210.3C	185.754	1.98131	0.492918	4.01956	5.83075e-05	0.0046619	58.6121	91.7615	427.022	165.618
227	BraA03g022970.3C	7916.35	1.98175	0.302654	6.54791	5.83482e-11	3.2126e-08	3024.77	3372.8	15475.5	9792.3
228	BraA07g015350.3C	734.962	1.98185	0.349415	5.67193	1.41202e-08	3.67823e-06	294.021	299.904	1508.37	837.556
229	BraA08g012680.3C	604.904	1.98403	0.384749	5.15668	2.51367e-07	4.61334e-05	249.822	238.356	1321.96	609.476
230	BraA01g013280.3C	1708.98	1.99089	0.3319	5.99847	1.99182e-09	6.61012e-07	624.555	749.759	3476.1	1985.53
231	BraA09g036670.3C	178.168	1.99388	0.521657	3.8222	0.000132266	0.00905162	91.2811	51.476	424.169	145.744
232	BraA06g012060.3C	287.95	1.99414	0.375042	5.31711	1.05427e-07	2.0935e-05	119.146	111.904	561.121	359.628
233	BraA06g011390.3C	86.0926	1.99449	0.505814	3.94313	8.0424e-05	0.00603205	27.8648	41.4046	132.196	142.905
234	BraA03g026800.3C	263.557	2.00942	0.458568	4.38195	1.17621e-05	0.00121255	91.2811	118.619	609.624	234.705
235	BraA06g025490.3C	208.409	2.02174	0.500616	4.0385	5.37934e-05	0.00437315	65.3381	99.5948	498.351	170.35
236	BraA03g058360.3C	192.04	2.02337	0.458205	4.41586	1.00609e-05	0.00108811	55.7295	96.2377	405.148	211.045
237	BraA06g026130.3C	326.704	2.02474	0.363529	5.56969	2.552e-08	6.12127e-06	111.459	146.595	612.478	436.286
238	BraA04g025990.3C	3755.99	2.0291	0.340332	5.96211	2.48994e-09	8.04283e-07	1110.75	1846.42	7402.04	4664.76
239	BraA10g033400.3C	179.962	2.03629	0.48638	4.18662	2.83142e-05	0.00254052	97.0462	43.6427	379.47	199.688
240	BraA02g009480.3C	296.421	2.04704	0.47171	4.33961	1.42734e-05	0.00141137	112.42	118.619	718.995	235.651
241	BraA09g021180.3C	807.705	2.05066	0.320403	6.40025	1.55122e-10	6.95922e-08	317.082	311.094	1558.77	1043.87
242	BraA01g006130.3C	343.892	2.06149	0.485576	4.24545	2.18156e-05	0.00203271	189.288	76.0949	786.52	323.666
243	BraA03g042380.3C	245.587	2.06163	0.380432	5.4192	5.98675e-08	1.27224e-05	74.9466	115.261	388.029	404.109
244	BraA03g042950.3C	4119.8	2.06227	0.350899	5.87709	4.17543e-09	1.24881e-06	1571	1612.54	9037.85	4257.81
245	BraA03g058520.3C	144.647	2.06376	0.423131	4.87736	1.07517e-06	0.000164854	55.7295	55.9522	261.539	205.367
246	BraA06g015790.3C	297.209	2.07042	0.401299	5.1593	2.47869e-07	4.58388e-05	143.167	85.0473	586.799	373.824
247	BraA07g027750.3C	141.249	2.09126	0.466742	4.48054	7.44549e-06	0.000850823	54.7687	52.595	300.532	157.101
248	BraA09g059600.3C	160.438	2.11006	0.425938	4.95391	7.27374e-07	0.000118264	62.4555	58.1902	313.847	207.26
249	BraA03g046300.3C	164.905	2.11416	0.486471	4.34592	1.38694e-05	0.00137919	41.3167	82.8092	352.84	182.653
250	BraA08g023370.3C	80.3522	2.11569	0.547825	3.86198	0.000112473	0.00808537	27.8648	32.4522	170.238	90.8535
251	BraA08g018110.3C	404.605	2.11796	0.392767	5.39241	6.95201e-08	1.42728e-05	187.366	115.261	835.024	480.766
252	BraA08g031480.3C	154.882	2.11955	0.515548	4.11125	3.9352e-05	0.00339268	34.5907	81.6901	338.575	164.672
253	BraA01g018010.3C	273.756	2.12842	0.365409	5.82475	5.71964e-09	1.64957e-06	100.89	102.952	514.519	376.663
254	BraA03g008100.3C	538.732	2.13432	0.43802	4.87266	1.10107e-06	0.000166715	117.224	283.118	1153.63	600.958
255	BraA03g014070.3C	143.735	2.13757	0.460628	4.64055	3.4749e-06	0.000440749	69.1815	36.9284	268.197	200.635
256	BraA03g042300.3C	193.55	2.1471	0.441233	4.86613	1.13802e-06	0.000170183	49.0035	93.9996	376.617	254.579
257	BraA03g047450.3C	11105.3	2.15366	0.38562	5.58494	2.33781e-08	5.66357e-06	2673.1	5478.83	23871.4	12397.7
258	BraA02g036290.3C	2937.23	2.17342	0.418642	5.1916	2.08499e-07	3.94616e-05	531.352	1601.35	5588.38	4027.84
259	BraA06g019700.3C	110.422	2.17404	0.486691	4.46697	7.93342e-06	0.000902324	44.1993	35.8094	225.399	136.28
260	BraA09g000290.3C	601.58	2.17836	0.346762	6.28201	3.34222e-10	1.30594e-07	195.053	240.594	1217.35	753.327
261	BraA02g043370.3C	197.481	2.18624	0.464837	4.70324	2.56064e-06	0.000348506	73.9857	68.2616	456.505	191.171
262	BraA05g036630.3C	247.673	2.19092	0.497613	4.40286	1.06831e-05	0.00114013	117.224	60.4283	597.261	215.777
263	BraA05g038350.3C	324.069	2.20024	0.408	5.39275	6.93893e-08	1.42728e-05	93.2028	138.761	695.219	369.092
264	BraA02g004300.3C	112.657	2.20494	0.472958	4.66201	3.13135e-06	0.00040785	34.5907	45.8808	216.84	153.315
265	BraA02g009470.3C	2499.93	2.20545	0.344837	6.39563	1.59887e-10	7.04259e-08	702.384	1079.88	5203.21	3014.25
266	BraA03g059720.3C	2585.63	2.21374	0.347435	6.37166	1.86995e-10	7.94764e-08	972.384	861.663	5687.29	2821.19
267	BraA03g021170.3C	444.971	2.2239	0.480433	4.62895	3.67527e-06	0.000461332	110.498	203.666	1109.88	355.843
268	BraA09g051590.3C	112.631	2.22868	0.486069	4.58511	4.53758e-06	0.000541514	34.5907	44.7617	231.106	140.066
269	BraA09g056160.3C	985.239	2.23683	0.40768	5.48672	4.09475e-08	9.10087e-06	316.121	373.76	2362.41	888.661
270	BraA01g014840.3C	2672.26	2.23918	0.312734	7.16002	8.06651e-13	7.51613e-10	885.907	982.52	5457.14	3363.47
271	BraA06g033180.3C	616.882	2.24088	0.336428	6.66082	2.72313e-11	1.57073e-08	239.253	191.356	1217.35	819.574
272	BraA09g047490.3C	1336.8	2.24359	0.351172	6.38888	1.67102e-10	7.22897e-08	328.612	604.283	2576.4	1837.89
273	BraA06g032430.3C	390.848	2.24363	0.343542	6.53088	6.53837e-11	3.51997e-08	131.637	140.999	747.527	543.228
274	BraA10g001200.3C	305.475	2.24413	0.355832	6.3067	2.8504e-10	1.1509e-07	91.2811	121.976	536.393	472.249
275	BraA09g002590.3C	1054.19	2.24697	0.345023	6.51254	7.3892e-11	3.80874e-08	404.519	328.999	2234.02	1249.24
276	BraA03g029760.3C	1333.54	2.24963	0.388062	5.79709	6.74753e-09	1.90076e-06	356.477	570.712	3017.69	1389.3
277	BraA05g025990.3C	274.635	2.25484	0.48905	4.61065	4.01413e-06	0.000491143	50.9253	139.88	608.673	299.059
278	BraA10g018650.3C	1890.48	2.26405	0.339814	6.66262	2.6898e-11	1.57073e-08	823.452	478.95	3691.03	2568.5
279	BraA04g020810.3C	124.655	2.27098	0.461036	4.92581	8.40096e-07	0.000133896	36.5124	49.2379	242.518	170.35
280	BraA07g016220.3C	196.15	2.27636	0.411462	5.53238	3.15909e-08	7.35885e-06	60.5338	73.8568	393.736	256.472
281	BraA04g028090.3C	481.138	2.27851	0.416446	5.47134	4.46657e-08	9.66134e-06	127.794	201.428	1100.37	494.962
282	BraA08g016550.3C	4412.3	2.29819	0.355961	6.45629	1.07299e-10	5.22506e-08	1880.39	1101.14	9375.47	5292.22
283	BraA09g065840.3C	6237.47	2.32265	0.379986	6.11247	9.8099e-10	3.39507e-07	2808.58	1347.33	13302.4	7491.63
284	BraA10g028150.3C	189.076	2.32536	0.432997	5.37038	7.85707e-08	1.59954e-05	57.6512	68.2616	405.148	225.241
285	BraA10g019840.3C	3430.48	2.35115	0.313581	7.49774	6.49256e-14	7.48994e-11	1077.12	1171.64	7158.57	4314.59
286	BraA04g003720.3C	588.939	2.37612	0.387469	6.13242	8.65516e-10	3.03884e-07	161.423	219.332	1327.67	647.331
287	BraA07g038220.3C	133.858	2.39832	0.509351	4.70857	2.49457e-06	0.000341432	46.121	39.1665	317.651	132.495
288	BraA03g050480.3C	224.173	2.40016	0.480172	4.99854	5.7767e-07	9.58536e-05	85.516	57.0712	544.953	209.152
289	BraA05g024120.3C	307.072	2.41156	0.40191	6.00025	1.97018e-09	6.61012e-07	127.794	66.0235	592.505	441.964
290	BraA03g014760.3C	605.224	2.42268	0.326286	7.42503	1.12757e-13	1.24166e-10	204.662	175.69	1184.06	856.483
291	BraA10g011230.3C	83.0037	2.4234	0.5341	4.53735	5.69667e-06	0.000663498	30.7473	21.2618	167.385	112.62
292	BraA06g001110.3C	173.071	2.44841	0.450873	5.43038	5.62354e-08	1.20563e-05	72.064	34.6903	328.113	257.418
293	BraA05g006080.3C	108.439	2.45212	0.542008	4.52413	6.06444e-06	0.000702953	26.9039	40.2855	256.784	109.781
294	BraA01g009520.3C	507.325	2.4643	0.397614	6.19772	5.72852e-10	2.16842e-07	125.872	185.761	1151.72	565.942
295	BraA03g059850.3C	249.79	2.47544	0.430205	5.7541	8.7107e-09	2.39802e-06	81.6726	70.4997	572.533	274.453
296	BraA03g021380.3C	190.836	2.4762	0.506949	4.88451	1.03687e-06	0.00016174	31.7082	85.0473	427.973	218.616
297	BraA02g044760.3C	292.395	2.47819	0.434529	5.70317	1.17602e-08	3.13079e-06	73.0249	105.19	680.002	311.362
298	BraA10g033570.3C	83.0395	2.48492	0.532247	4.66872	3.03079e-06	0.000399043	27.8648	22.3809	170.238	111.674
299	BraA02g043750.3C	566.638	2.50333	0.455774	5.49248	3.96324e-08	8.89014e-06	250.783	88.4044	1263	664.366
300	BraA05g031950.3C	1104.82	2.52019	0.449735	5.60373	2.09791e-08	5.23959e-06	192.171	464.403	2670.55	1092.13
301	BraA06g035910.3C	924.344	2.55504	0.315574	8.09649	5.65686e-16	1.14203e-12	232.527	305.499	1798.44	1360.91
302	BraA05g004090.3C	526.19	2.56767	0.467286	5.49487	3.91004e-08	8.85276e-06	81.6726	222.69	1232.56	567.834
303	BraA03g018550.3C	56.6571	2.58349	0.626179	4.1258	3.69455e-05	0.00321957	22.0996	10.0714	91.301	103.157
304	BraA05g039750.3C	237.683	2.58549	0.498621	5.18528	2.15693e-07	4.05068e-05	73.0249	62.6664	620.086	194.956
305	BraA07g014730.3C	94.4955	2.60389	0.530899	4.90467	9.35853e-07	0.000147221	29.7865	23.4999	210.183	114.513
306	BraA07g043020.3C	3042.79	2.60778	0.378734	6.88553	5.75738e-12	4.22662e-09	595.729	1120.16	6860.89	3594.39
307	BraAnng003590.3C	734.759	2.61013	0.328064	7.95615	1.77474e-15	2.61217e-12	162.384	251.785	1330.52	1194.34
308	BraA02g045280.3C	953.414	2.62388	0.34936	7.51054	5.88819e-14	7.13236e-11	188.327	344.665	1834.58	1446.08
309	BraA03g040660.3C	289.536	2.6301	0.386126	6.81149	9.659e-12	6.31636e-09	98.0071	62.6664	574.435	423.037
310	BraA03g007300.3C	6742.04	2.6431	0.317843	8.31573	9.11904e-17	2.20918e-13	1639.22	2082.54	14521.6	8724.77
311	BraA03g005120.3C	135.013	2.66086	0.564225	4.71596	2.40574e-06	0.000331144	42.2776	31.3332	359.498	106.942
312	BraA05g033880.3C	1194.22	2.66225	0.375575	7.08847	1.35605e-12	1.17328e-09	302.669	349.141	2847.45	1277.63
313	BraA04g030950.3C	73.3335	2.68404	0.640181	4.19262	2.75751e-05	0.00249267	9.60854	30.2142	168.336	85.1751
314	BraA10g013010.3C	7588.44	2.68767	0.42251	6.3612	2.00181e-10	8.36135e-08	1277.94	2800.96	18577.9	7696.99
315	BraA02g023560.3C	281.991	2.71042	0.502416	5.39477	6.86111e-08	1.42728e-05	77.8292	71.6188	761.793	216.723
316	BraA06g010320.3C	294.022	2.71492	0.442452	6.13608	8.45837e-10	3.01342e-07	90.3203	64.9045	712.338	308.523
317	BraA01g017340.3C	184.417	2.72068	0.41173	6.60793	3.89727e-11	2.1957e-08	40.3559	57.0712	291.022	349.218
318	BraA03g043240.3C	2984.72	2.7286	0.386249	7.06435	1.61366e-12	1.34802e-09	660.107	905.306	7357.34	3016.15
319	BraA05g038320.3C	397.402	2.73446	0.421796	6.48288	8.99891e-11	4.54183e-08	82.6334	125.333	947.248	434.393
320	BraA07g027330.3C	253.273	2.73887	0.440537	6.2171	5.06415e-10	1.94737e-07	37.4733	95.1187	459.358	421.144
321	BraA09g041510.3C	67.6464	2.74195	0.573724	4.77921	1.75984e-06	0.000245022	17.2954	17.9047	138.854	96.5318
322	BraA03g009830.3C	784.028	2.75724	0.472519	5.8352	5.37259e-09	1.56815e-06	111.459	293.189	1967.73	763.737
323	BraA10g021100.3C	3244.42	2.7605	0.349343	7.90198	2.74513e-15	3.69464e-12	667.793	1001.54	7323.1	3985.25
324	BraA02g015030.3C	112.129	2.7764	0.542041	5.12211	3.02128e-07	5.42173e-05	43.2384	13.4285	201.623	190.225
325	BraA02g000270.3C	428.743	2.78325	0.407772	6.8255	8.76179e-12	5.96961e-09	113.381	104.071	1032.84	464.678
326	BraA01g038200.3C	1218.82	2.7857	0.403895	6.89711	5.30724e-12	4.01791e-09	244.057	373.76	3017.69	1239.77
327	BraA02g020820.3C	603.725	2.80282	0.362102	7.74042	9.9091e-15	1.26346e-11	108.576	194.713	1202.13	909.481
328	BraA08g030540.3C	212.991	2.80905	0.399467	7.032	2.036e-12	1.64414e-09	62.4555	43.6427	408.952	336.915
329	BraA07g029200.3C	165.917	2.81066	0.47554	5.91045	3.4118e-09	1.07198e-06	49.0035	33.5713	388.029	193.064
330	BraA01g009230.3C	114.618	2.82155	0.523117	5.39371	6.90161e-08	1.42728e-05	28.8256	27.9761	274.854	126.816
331	BraA01g007360.3C	515.386	2.82384	0.417491	6.76383	1.34387e-11	8.13914e-09	122.028	133.166	1288.68	517.676
332	BraA09g005650.3C	422.066	2.84836	0.391971	7.26677	3.68186e-13	3.87812e-10	140.285	64.9045	788.422	694.651
333	BraA06g026140.3C	1019.72	2.86394	0.360147	7.95215	1.83303e-15	2.61217e-12	243.096	249.547	2389.99	1196.24
334	BraA10g026240.3C	464.317	2.89812	0.468289	6.18874	6.06487e-10	2.22617e-07	121.068	98.4758	1254.44	383.288
335	BraA08g016300.3C	422.324	2.9466	0.368913	7.98725	1.37983e-15	2.22851e-12	84.5551	109.666	919.667	575.405
336	BraA01g015910.3C	415.343	2.96742	0.413259	7.18054	6.94372e-13	7.0091e-10	77.8292	110.785	1000.51	472.249
337	BraA07g031300.3C	1437.05	2.97207	0.414347	7.17291	7.34227e-13	7.11495e-10	462.171	186.88	3281.13	1818.02
338	BraA02g043360.3C	131.288	3.00565	0.527253	5.70058	1.19401e-08	3.14414e-06	35.5516	22.3809	325.26	141.959
339	BraAnng003750.3C	53.828	3.04884	0.793772	3.84096	0.000122555	0.00860587	7.68683	15.6666	160.728	31.2309
340	BraA03g028380.3C	78.3575	3.10308	0.566924	5.47354	4.41143e-08	9.62805e-06	20.1779	12.3095	165.483	115.46
341	BraA07g027340.3C	83.7328	3.15293	0.655304	4.81139	1.49881e-06	0.000216132	19.2171	14.5476	236.812	64.3546
342	BraA01g007100.3C	77.8446	3.20526	0.640572	5.00375	5.62269e-07	9.4594e-05	20.1779	10.0714	203.525	77.604
343	BraA03g001630.3C	304.55	3.20895	0.361042	8.88804	6.21973e-19	2.15256e-15	59.5729	59.3093	500.253	599.065
344	BraA08g029210.3C	33.3808	3.2425	0.842494	3.84869	0.000118752	0.00838743	2.88256	10.0714	77.0352	43.534
345	BraA10g029880.3C	106.819	3.32001	0.514528	6.45253	1.09997e-10	5.22506e-08	13.452	25.738	206.378	181.707
346	BraA09g048860.3C	34.6398	3.35241	0.790952	4.23844	2.25074e-05	0.00208116	6.72598	5.59522	75.1331	51.1051
347	BraA03g005140.3C	125.841	3.36541	0.524053	6.42189	1.34589e-10	6.15197e-08	12.4911	32.4522	268.197	190.225
348	BraA03g053600.3C	377.776	3.3812	0.346978	9.74473	1.94298e-22	9.41413e-19	66.2989	66.0235	750.38	628.403
349	BraA06g042860.3C	2456.45	3.40783	0.338755	10.0599	8.31237e-24	5.03439e-20	378.576	467.76	5812.83	3166.62
350	BraA05g009180.3C	495.431	3.41888	0.426239	8.02104	1.04855e-15	1.95401e-12	108.576	60.4283	1236.37	576.352
351	BraA03g033660.3C	766.634	3.43333	0.418632	8.20131	2.37773e-16	5.23663e-13	105.694	154.428	2005.77	800.646
352	BraA03g027160.3C	109.153	3.44203	0.622607	5.52841	3.23151e-08	7.45587e-06	22.0996	14.5476	312.896	87.0679
353	BraA10g027040.3C	1037.19	3.58514	0.29516	12.1464	5.99259e-34	4.83921e-30	154.697	164.499	2023.84	1805.71
354	BraA03g008060.3C	29.4522	3.59498	0.944045	3.80806	0.000140061	0.00939921	7.68683	1.11904	34.2379	74.7649
355	BraA01g040660.3C	123.353	3.61347	0.650857	5.55187	2.82635e-08	6.64769e-06	18.2562	19.0237	380.421	75.7112
356	BraA09g035710.3C	172.949	3.62185	0.602527	6.0111	1.84272e-09	6.28758e-07	40.3559	11.1904	485.988	154.262
357	BraA04g024120.3C	113.437	3.81251	0.560017	6.80784	9.90761e-12	6.31636e-09	13.452	16.7856	290.071	133.441
358	BraA07g016850.3C	31.9484	3.86363	0.88303	4.37542	1.21196e-05	0.00123886	4.80427	3.35713	78.9373	40.6948
359	BraA06g001970.3C	161.447	3.88049	0.615897	6.30054	2.96603e-10	1.17795e-07	31.7082	8.95234	464.113	141.012
360	BraA04g028460.3C	322.369	3.93887	0.447042	8.81095	1.24092e-18	3.36384e-15	45.1601	33.5713	835.975	374.771
361	BraA05g014680.3C	78.3936	4.00405	0.650873	6.15181	7.66013e-10	2.76977e-07	11.5302	6.71426	204.476	90.8535
362	BraA07g038090.3C	49.9895	4.06279	0.724375	5.60868	2.0388e-08	5.145e-06	6.72598	4.47617	86.5457	102.21
363	BraA03g011180.3C	36.113	4.10364	0.963605	4.25864	2.05677e-05	0.00192384	7.68683	0	98.9094	37.8556
364	BraA02g004310.3C	133.947	4.19969	0.617487	6.80126	1.03711e-11	6.44234e-09	16.3345	11.1904	396.589	111.674
365	BraA05g012140.3C	102.378	4.36556	0.635064	6.87421	6.23327e-12	4.44138e-09	5.76512	13.4285	275.805	114.513
366	BraA09g054360.3C	1996.08	4.62112	0.347126	13.3125	1.95814e-40	2.3719e-36	196.975	114.142	3065.24	4607.98
367	BraA05g003710.3C	22.0809	4.81851	1.20975	3.98305	6.80355e-05	0.00530661	2.88256	0	54.21	31.2309
368	BraA03g057220.3C	168.507	4.84039	0.531229	9.11168	8.11126e-20	3.27505e-16	11.5302	11.1904	425.12	226.187
369	BraA01g018560.3C	242.37	5.33526	0.605581	8.81016	1.24967e-18	3.36384e-15	15.3737	7.8333	748.478	197.796
370	BraA09g031610.3C	102.209	5.63182	0.82533	6.82373	8.87088e-12	5.96961e-09	6.72598	1.11904	329.064	71.9257
371	BraA01g001510.3C	1058.66	7.27369	0.424434	17.1374	7.8081e-66	1.89159e-61	8.64768	19.0237	2368.12	1838.84
