# Supplementary material for: Application of Long-Chained Auxin Conjugates Influenced Auxin Metabolism and Transcriptome Response in Brassica rapa L. ssp. pekinensis
Source: Int J Mol Sci. 2023 Dec 28;25(1):447. doi: 10.3390/ijms25010447 (PMC10778880; doi:10.3390/ijms25010447)
Supplement: Supplementary file 1 [file ijms-25-00447-s001.zip › Table S2.xlsx]

## Sheet: DESeq2_ipa_new-resultsSignifica
	gene	baseMean	log2FoldChange	lfcSE	stat	pvalue	padj	Control1	Control2	IPA-Ala1	IPA-Ala2
1	BraA02g001260.3C	108.741	-10.2408	1.50613	-6.79937	1.05077e-11	3.50833e-09	234.035	200.928	0	0
2	BraA02g001050.3C	22.6004	-4.13031	0.989406	-4.17453	2.98596e-05	0.00223808	35.5733	49.9605	1.9957	2.87232
3	BraA03g034150.3C	37.4847	-2.91286	0.687424	-4.23736	2.26161e-05	0.00175661	61.7852	70.5963	7.98279	9.5744
4	BraA03g026020.3C	40.8236	-2.89707	0.757031	-3.82688	0.000129776	0.00823803	90.8055	53.2188	2.99355	16.2765
5	BraA09g004340.3C	146.726	-2.62541	0.420402	-6.245	4.238e-10	1.01827e-07	263.991	241.114	33.9269	47.872
6	BraA02g043150.3C	771.934	-2.60954	0.388158	-6.72287	1.78176e-11	5.72589e-09	869.673	1783.37	260.439	174.254
7	BraA03g035300.3C	367.351	-2.57494	0.384024	-6.70516	2.01192e-11	6.38572e-09	505.515	752.665	132.714	78.5101
8	BraA01g017810.3C	47.0441	-2.55566	0.610598	-4.1855	2.84544e-05	0.00215157	73.955	86.8878	12.972	14.3616
9	BraA09g009970.3C	306.225	-2.53586	0.379311	-6.68543	2.30247e-11	7.12064e-09	433.432	611.473	70.8473	109.148
10	BraA03g003010.3C	186.224	-2.47833	0.385351	-6.43136	1.26469e-10	3.42252e-08	342.627	288.902	56.8774	56.4889
11	BraA10g012180.3C	68.5958	-2.39433	0.535235	-4.47342	7.69778e-06	0.000687161	133.868	96.6627	18.9591	24.8934
12	BraA03g003000.3C	141.59	-2.34357	0.455875	-5.14082	2.73538e-07	3.39728e-05	252.758	220.478	29.9355	63.191
13	BraA10g022740.3C	95.5603	-2.29841	0.518665	-4.4314	9.3625e-06	0.000813178	214.376	103.179	36.9204	27.7657
14	BraA09g005630.3C	186.934	-2.23242	0.425321	-5.24878	1.53109e-07	2.05014e-05	361.35	255.233	46.8989	84.2547
15	BraA10g019590.3C	614.631	-2.1796	0.38136	-5.71532	1.09496e-08	1.88929e-06	647.808	1366.31	216.533	227.871
16	BraA01g020780.3C	319.465	-2.15716	0.434184	-4.96831	6.75402e-07	7.71729e-05	739.55	304.107	132.714	101.489
17	BraA01g013470.3C	353.013	-2.06327	0.464322	-4.44362	8.84591e-06	0.000776175	848.142	291.074	164.645	108.191
18	BraA03g040840.3C	106.017	-2.01717	0.458698	-4.39761	1.09449e-05	0.000931731	203.142	136.848	42.9075	41.1699
19	BraA02g039880.3C	792.024	-1.93876	0.306571	-6.32404	2.54815e-10	6.42259e-08	1155.2	1357.62	293.368	361.912
20	BraA08g035120.3C	1376.69	-1.92073	0.311419	-6.16768	6.93008e-10	1.59076e-07	2584.68	1771.42	538.838	611.804
21	BraA08g009740.3C	583.714	-1.91831	0.327676	-5.85429	4.79061e-09	8.92477e-07	929.586	916.666	291.372	197.233
22	BraA10g030360.3C	300.611	-1.74792	0.363906	-4.80322	1.56134e-06	0.000161207	556.067	370.359	148.679	127.339
23	BraA02g013080.3C	220.704	-1.7112	0.425066	-4.02573	5.6798e-05	0.00392532	266.8	409.459	135.707	70.8505
24	BraA03g036400.3C	327.088	-1.66763	0.353556	-4.71673	2.39663e-06	0.000236981	588.831	406.2	147.682	165.637
25	BraA02g006880.3C	421.109	-1.65786	0.386136	-4.29347	1.75905e-05	0.00140883	688.062	590.837	273.411	132.127
26	BraA06g039240.3C	175.215	-1.53848	0.393989	-3.90488	9.42713e-05	0.00623039	250.885	270.438	106.77	72.7654
27	BraA03g038630.3C	262.537	-1.53018	0.364628	-4.19656	2.71001e-05	0.00206741	453.091	326.915	121.738	148.403
28	BraA09g054390.3C	195.731	-1.48226	0.386953	-3.83061	0.000127826	0.00814007	292.075	284.557	81.8236	124.467
29	BraA06g035270.3C	466.088	-1.46902	0.333205	-4.40876	1.03966e-05	0.000890952	800.399	569.115	232.499	262.338
30	BraA09g010360.3C	406.402	-1.43118	0.343767	-4.16323	3.13777e-05	0.00233823	488.665	697.274	241.479	198.19
31	BraA06g024940.3C	409.242	-1.42332	0.352219	-4.04102	5.32199e-05	0.00374624	651.553	540.876	172.628	271.913
32	BraA10g016750.3C	636.857	-1.40415	0.349224	-4.02078	5.80048e-05	0.00398728	674.956	1174.07	365.213	333.189
33	BraA03g049900.3C	226.403	-1.35727	0.354234	-3.83158	0.000127324	0.00814007	313.607	337.776	130.718	123.51
34	BraA10g023660.3C	289.024	-1.35636	0.356293	-3.80686	0.000140743	0.00882525	485.856	345.379	172.628	152.233
35	BraA10g024990.3C	446.025	-1.30177	0.321489	-4.0492	5.13924e-05	0.00364985	578.534	690.758	276.404	238.402
36	BraA03g064230.3C	1615.08	-1.27833	0.295323	-4.32857	1.50079e-05	0.00121332	2035.17	2539.3	1032.77	853.079
37	BraA07g022010.3C	568.13	-1.239	0.323426	-3.83087	0.000127692	0.00814007	864.056	732.03	390.159	286.274
38	BraA05g007450.3C	619.052	-1.21409	0.311533	-3.89716	9.73289e-05	0.00639956	968.904	761.354	357.23	388.72
39	BraA09g014400.3C	1068.54	-1.15927	0.291483	-3.97714	6.97498e-05	0.00470656	1374.25	1578.1	699.492	622.336
40	BraA08g024150.3C	6295	-1.12637	0.274291	-4.10647	4.01754e-05	0.00291771	9367.94	7901.36	4027.32	3883.38
41	BraA01g008750.3C	1687.28	1.07472	0.284319	3.77998	0.000156839	0.00973958	998.86	1174.07	2189.28	2386.9
42	BraA05g032430.3C	1430.34	1.11574	0.294659	3.78652	0.000152769	0.00953287	961.415	844.984	1725.28	2189.66
43	BraA06g013100.3C	9710.98	1.13821	0.298427	3.81402	0.000136725	0.00859426	4948.43	7186.71	12390.3	14318.5
44	BraA03g010480.3C	3693.89	1.16153	0.278943	4.16404	3.12659e-05	0.00233667	2511.66	2052.72	5108.99	5102.2
45	BraA01g003740.3C	1525.58	1.17992	0.289931	4.06967	4.70801e-05	0.00335286	1008.22	860.189	2296.05	1937.86
46	BraA10g005490.3C	499.038	1.19646	0.311481	3.84119	0.00012244	0.00786955	295.82	310.624	744.395	645.314
47	BraA03g056960.3C	889.42	1.19716	0.317391	3.77188	0.000162019	0.00998885	529.855	550.651	999.845	1477.33
48	BraA04g014630.3C	990.294	1.20474	0.295714	4.07399	4.62136e-05	0.00330029	634.702	563.684	1503.76	1259.03
49	BraA01g025230.3C	1010.67	1.21115	0.299375	4.0456	5.21895e-05	0.00369625	535.471	684.241	1476.82	1346.16
50	BraA01g002700.3C	547.021	1.21889	0.322818	3.7758	0.000159498	0.00985703	293.948	363.843	669.557	860.738
51	BraA07g001240.3C	650.488	1.22529	0.300688	4.07494	4.60254e-05	0.00329601	374.456	405.114	954.941	867.44
52	BraA07g029140.3C	556.09	1.22752	0.318735	3.85123	0.000117524	0.00757247	283.65	382.306	796.283	762.122
53	BraA03g012070.3C	2872.85	1.24568	0.278794	4.46812	7.89111e-06	0.000701981	1829.22	1579.19	3837.73	4245.29
54	BraA09g051160.3C	2194.57	1.27092	0.297753	4.26835	1.96926e-05	0.001553	1274.09	1297.89	2581.43	3624.87
55	BraA05g040740.3C	634.266	1.27607	0.337749	3.77817	0.000157988	0.00978726	424.071	317.14	725.436	1070.42
56	BraA02g008140.3C	375.906	1.27726	0.333994	3.82422	0.000131189	0.00828966	206.887	232.425	464	600.315
57	BraA05g000150.3C	612.953	1.28521	0.312863	4.10791	3.99258e-05	0.0029078	311.734	401.856	910.038	828.185
58	BraA06g025820.3C	895.067	1.30086	0.308945	4.21064	2.54647e-05	0.00194843	601.001	432.267	1258.29	1288.71
59	BraAnng003630.3C	1281.11	1.31139	0.295654	4.43555	9.18364e-06	0.000800346	814.441	657.089	1685.37	1967.54
60	BraA02g014190.3C	814.984	1.34115	0.315409	4.2521	2.11773e-05	0.00165485	381.009	541.963	1107.61	1229.35
61	BraA06g043040.3C	309.039	1.3451	0.354003	3.79969	0.000144877	0.0090624	187.228	161.828	367.208	519.89
62	BraA03g055650.3C	331.937	1.35233	0.336674	4.01674	5.90075e-05	0.0040454	204.078	169.431	441.049	513.188
63	BraA05g032630.3C	610.927	1.3576	0.304828	4.45365	8.44218e-06	0.000745842	327.649	358.412	822.227	935.419
64	BraA01g034810.3C	2930.26	1.35878	0.272745	4.98188	6.29707e-07	7.3254e-05	1692.54	1595.48	4135.09	4297.95
65	BraA04g024790.3C	897.261	1.35929	0.29095	4.67189	2.98439e-06	0.000288442	482.112	524.585	1256.29	1326.05
66	BraA03g030540.3C	940.125	1.36755	0.297154	4.60217	4.18104e-06	0.000392761	507.387	543.049	1218.37	1491.69
67	BraA10g021500.3C	1032.77	1.36765	0.289797	4.71933	2.36625e-06	0.00023488	615.979	537.618	1461.85	1515.63
68	BraA07g037110.3C	264.664	1.37249	0.358902	3.82413	0.000131234	0.00828966	152.591	142.279	443.045	320.742
69	BraA02g040860.3C	1065.31	1.37295	0.32257	4.25629	2.07847e-05	0.00162912	631.894	554.996	1206.4	1867.96
70	BraA03g028510.3C	500.949	1.37471	0.315051	4.36345	1.28028e-05	0.00106176	260.247	297.591	667.561	778.398
71	BraA01g018200.3C	6578.13	1.37566	0.326156	4.21778	2.46719e-05	0.0018934	4094.67	3224.62	7057.78	11935.4
72	BraA07g038660.3C	1004.68	1.37575	0.302304	4.55087	5.34247e-06	0.000488789	630.958	486.572	1540.68	1360.52
73	BraA09g065370.3C	1731.08	1.38092	0.289867	4.76398	1.8981e-06	0.000191366	943.628	977.488	2803.96	2199.24
74	BraA01g011610.3C	2351.51	1.38589	0.334316	4.14546	3.39138e-05	0.00251265	947.373	1656.3	3776.86	3025.51
75	BraA07g003290.3C	514.983	1.3876	0.349548	3.9697	7.19624e-05	0.00484315	288.331	281.299	556.8	933.504
76	BraA09g005910.3C	3023.98	1.38925	0.353663	3.92817	8.55941e-05	0.00568615	1114.94	2227.59	4882.47	3870.93
77	BraA03g016260.3C	2983.57	1.39057	0.293025	4.74558	2.07907e-06	0.00020798	1702.84	1592.22	3647.14	4992.09
78	BraA03g006630.3C	2649.71	1.39241	0.31792	4.37975	1.18818e-05	0.000995015	1814.24	1108.91	4017.34	3658.38
79	BraA09g005890.3C	438.183	1.39422	0.31995	4.35762	1.31485e-05	0.00108693	260.247	222.65	597.711	672.123
80	BraA07g020420.3C	1127.48	1.39758	0.314447	4.44456	8.80728e-06	0.000775433	502.707	738.546	1749.23	1519.46
81	BraA09g064150.3C	263.488	1.40025	0.346764	4.03806	5.38951e-05	0.00377236	137.612	152.054	408.12	356.168
82	BraA01g019000.3C	5069.58	1.40805	0.272364	5.16975	2.3441e-07	2.95415e-05	2902.97	2646.82	7713.37	7015.16
83	BraA10g000300.3C	404.695	1.41259	0.352623	4.00597	6.1764e-05	0.00421191	174.122	268.266	654.589	521.805
84	BraA07g036830.3C	1210.77	1.42213	0.301935	4.71003	2.47676e-06	0.000243965	756.4	559.34	1847.02	1680.31
85	BraA02g005100.3C	309.253	1.42752	0.354507	4.02676	5.65508e-05	0.00391877	157.271	178.12	371.2	530.422
86	BraA08g031620.3C	299.591	1.43053	0.346786	4.12511	3.70551e-05	0.00272186	165.697	158.57	377.187	496.911
87	BraA05g000260.3C	2756.38	1.43345	0.334275	4.28823	1.80106e-05	0.00142912	1375.19	1604.17	2880.79	5165.39
88	BraA06g006990.3C	235.245	1.43785	0.35707	4.02679	5.65432e-05	0.00391877	139.485	114.04	331.286	356.168
89	BraA06g011800.3C	188.714	1.44206	0.381067	3.78426	0.000154166	0.00959671	102.039	101.007	315.32	236.488
90	BraA07g010650.3C	330.448	1.45382	0.379544	3.83044	0.000127916	0.00814007	230.29	122.729	468.989	499.783
91	BraA10g021480.3C	1332.31	1.46438	0.337131	4.34365	1.40138e-05	0.00114374	572.917	844.984	2368.89	1542.44
92	BraA03g029380.3C	200.529	1.46754	0.375615	3.90702	9.34401e-05	0.00619137	122.634	90.1461	296.361	292.977
93	BraA07g004830.3C	1200.75	1.47773	0.35814	4.12612	3.68939e-05	0.00271778	835.036	433.353	1530.7	2003.92
94	BraA06g012710.3C	2299.24	1.48038	0.282378	5.24253	1.58391e-07	2.09901e-05	1109.32	1317.44	3219.06	3551.14
95	BraA04g003720.3C	351.343	1.4853	0.338754	4.3846	1.16197e-05	0.000981594	157.271	212.875	525.866	509.358
96	BraA06g026130.3C	238.155	1.48585	0.381814	3.89155	9.9607e-05	0.00653264	108.592	142.279	282.391	419.359
97	BraA07g036430.3C	2631.54	1.49058	0.29154	5.11279	3.17437e-07	3.90478e-05	1392.04	1370.65	4458.39	3305.08
98	BraA03g002170.3C	267.931	1.4983	0.360103	4.16076	3.17186e-05	0.0023568	164.76	115.126	379.183	412.656
99	BraA03g009470.3C	1087.97	1.49889	0.31986	4.6861	2.78462e-06	0.000272205	582.278	554.996	1950.79	1263.82
100	BraA04g014020.3C	428.495	1.49985	0.322353	4.65283	3.27412e-06	0.000309465	200.334	247.63	621.66	644.357
101	BraA02g022730.3C	1649.29	1.5022	0.278149	5.40069	6.63849e-08	9.75252e-06	876.226	844.984	2451.71	2424.24
102	BraA03g004550.3C	1571.34	1.50581	0.327213	4.60193	4.18595e-06	0.000392761	654.361	982.918	2712.15	1935.94
103	BraA05g014510.3C	457.263	1.51129	0.352401	4.28854	1.7985e-05	0.00142912	191.908	283.471	563.785	789.888
104	BraA08g019400.3C	347.666	1.52316	0.326478	4.66542	3.07983e-06	0.000296552	179.739	179.206	533.849	497.869
105	BraA03g023210.3C	2102.26	1.52494	0.380441	4.00834	6.11462e-05	0.00418087	1326.51	841.725	2014.66	4226.14
106	BraA10g005670.3C	306.732	1.53038	0.365627	4.18561	2.84395e-05	0.00215157	159.144	156.398	352.241	559.145
107	BraA03g022970.3C	6054.39	1.53273	0.284332	5.39062	7.02139e-08	1.01412e-05	2946.97	3273.5	7852.07	10145
108	BraA07g042640.3C	1184.64	1.53366	0.294779	5.20277	1.96345e-07	2.52392e-05	665.595	550.651	1888.93	1633.39
109	BraA02g018610.3C	595.312	1.53921	0.335743	4.58448	4.55116e-06	0.000422403	338.882	270.438	1056.72	715.207
110	BraA10g029550.3C	1939.12	1.5402	0.3753	4.10391	4.06221e-05	0.00294184	1179.54	804.798	1860.99	3911.14
111	BraA04g029030.3C	601.629	1.54477	0.305193	5.06161	4.15721e-07	4.97106e-05	286.459	328.001	868.128	923.929
112	BraA09g058700.3C	434.985	1.54703	0.330766	4.6771	2.90954e-06	0.000282269	191.908	251.975	701.488	594.57
113	BraA09g041490.3C	512.125	1.5501	0.31876	4.86292	1.15668e-06	0.000122453	234.971	286.73	701.488	825.313
114	BraA09g020370.3C	456.314	1.55389	0.366304	4.24207	2.21464e-05	0.00172534	166.633	297.591	603.699	757.335
115	BraA02g002870.3C	288.762	1.55599	0.354798	4.38557	1.15683e-05	0.000981551	120.762	172.689	423.088	438.507
116	BraA04g023120.3C	318.344	1.55617	0.357576	4.352	1.34904e-05	0.00111162	180.675	142.279	394.15	556.272
117	BraA05g036610.3C	749.463	1.56991	0.328088	4.78504	1.70956e-06	0.000175253	397.859	357.326	1356.08	886.589
118	BraA06g026530.3C	150.817	1.57004	0.402605	3.8997	9.63112e-05	0.00634888	82.3802	69.5102	199.57	251.807
119	BraA01g004460.3C	1160.39	1.57499	0.314922	5.00121	5.69727e-07	6.68818e-05	465.261	701.619	1800.12	1674.56
120	BraA09g038140.3C	842.271	1.57655	0.36358	4.33618	1.44983e-05	0.00117583	309.862	536.532	1532.7	989.993
121	BraA09g005570.3C	852.708	1.58202	0.292337	5.41162	6.24571e-08	9.22821e-06	425.007	429.008	1335.12	1221.69
122	BraA03g037010.3C	2232.43	1.58306	0.35806	4.4212	9.81551e-06	0.000846802	718.019	1517.28	3357.76	3336.68
123	BraA03g054350.3C	323.273	1.59769	0.351948	4.53955	5.63735e-06	0.000512122	187.228	133.59	531.853	440.422
124	BraA03g033670.3C	464.55	1.5982	0.318364	5.02003	5.16633e-07	6.1208e-05	253.694	207.445	689.514	707.548
125	BraA03g023660.3C	285.957	1.6066	0.390946	4.10952	3.96474e-05	0.00289572	96.4223	186.809	422.09	438.507
126	BraA01g044050.3C	1086.14	1.6078	0.306817	5.24025	1.60363e-07	2.11424e-05	589.768	483.313	1415.95	1855.52
127	BraA05g003770.3C	5724.75	1.61323	0.33213	4.85724	1.19033e-06	0.000125418	2112.87	3528.73	7200.48	10056.9
128	BraA07g040570.3C	15273.5	1.61633	0.324855	4.97555	6.50631e-07	7.50093e-05	7643.57	7382.2	16548.3	29519.8
129	BraA09g000160.3C	1995.54	1.62547	0.292977	5.54812	2.88763e-08	4.69861e-06	990.435	963.368	2584.43	3443.91
130	BraA04g032140.3C	181.739	1.62787	0.378061	4.30583	1.66358e-05	0.00134072	90.8055	86.8878	252.456	296.806
131	BraA03g055790.3C	5187.88	1.62886	0.331023	4.92068	8.62427e-07	9.51594e-05	1864.79	3206.16	8880.85	6799.74
132	BraA08g016320.3C	366.673	1.63016	0.324315	5.02647	4.99593e-07	5.94632e-05	185.356	172.689	565.78	542.868
133	BraA02g044760.3C	178.165	1.64144	0.425964	3.85346	0.000116461	0.00754182	71.1466	102.093	198.572	340.849
134	BraA04g032130.3C	467.835	1.65064	0.336972	4.89844	9.65995e-07	0.000105232	221.865	230.253	574.761	844.462
135	BraA05g001270.3C	1300.88	1.65296	0.312648	5.28696	1.24367e-07	1.70981e-05	513.004	742.891	1799.12	2148.49
136	BraA06g004920.3C	918.89	1.65466	0.385678	4.29026	1.78465e-05	0.0014249	525.174	360.584	894.073	1895.73
137	BraA03g047450.3C	8217.03	1.65506	0.352213	4.69903	2.61395e-06	0.000256496	2604.34	5317.53	13716.4	11229.8
138	BraA03g053600.3C	133.48	1.65529	0.418946	3.95108	7.78007e-05	0.0052088	64.5936	64.0797	171.63	233.615
139	BraA08g024350.3C	845.06	1.65645	0.311509	5.31751	1.05199e-07	1.45407e-05	445.602	368.187	1454.86	1111.59
140	BraA05g022780.3C	461.616	1.66116	0.379799	4.37378	1.22113e-05	0.00101599	292.075	150.968	799.277	604.144
141	BraA10g019360.3C	1435.36	1.66934	0.311305	5.36239	8.21259e-08	1.1601e-05	591.64	781.99	2505.6	1862.22
142	BraA10g031050.3C	166.816	1.6713	0.407892	4.0974	4.17816e-05	0.00301731	90.8055	68.4241	298.357	209.679
143	BraA04g026210.3C	457.506	1.68631	0.383132	4.40138	1.07564e-05	0.000918722	192.845	241.114	925.006	471.06
144	BraA04g020130.3C	581.894	1.68935	0.380322	4.4419	8.91699e-06	0.000779751	213.44	337.776	1142.54	633.825
145	BraA09g057250.3C	1060.7	1.6912	0.321495	5.26041	1.43736e-07	1.94491e-05	392.242	611.473	1538.68	1700.41
146	BraA07g014550.3C	390.637	1.69758	0.329709	5.14873	2.62251e-07	3.28888e-05	197.525	170.517	652.593	541.911
147	BraA05g036630.3C	184.022	1.69972	0.436986	3.88964	0.000100391	0.00656732	114.209	58.6493	337.273	225.956
148	BraA06g041220.3C	140.717	1.70038	0.415751	4.08991	4.31539e-05	0.00310769	60.849	71.6824	247.467	182.871
149	BraA07g005400.3C	208.493	1.7012	0.397705	4.27754	1.88971e-05	0.00149485	97.3584	98.8349	239.484	398.295
150	BraA05g039750.3C	140.567	1.70406	0.421427	4.04354	5.26511e-05	0.0037187	71.1466	60.8214	175.621	254.679
151	BraA03g020140.3C	269.453	1.71578	0.348296	4.92622	8.3834e-07	9.29004e-05	131.996	119.471	380.18	446.167
152	BraA05g009090.3C	933.498	1.71699	0.312482	5.49469	3.91406e-08	6.21151e-06	357.605	513.724	1463.84	1398.82
153	BraA10g018980.3C	432.177	1.71991	0.396548	4.3372	1.44312e-05	0.00117409	277.097	124.901	725.436	601.272
154	BraA09g047490.3C	972.803	1.72003	0.351263	4.8967	9.74594e-07	0.000105455	320.16	586.493	1660.42	1324.14
155	BraA10g001200.3C	222.738	1.7235	0.368145	4.68157	2.84684e-06	0.000277233	88.9332	118.385	355.234	328.402
156	BraA05g012270.3C	229.93	1.72423	0.361259	4.77284	1.81645e-06	0.000183855	110.464	103.179	318.314	387.763
157	BraA03g033390.3C	241.645	1.73503	0.360848	4.80821	1.5229e-06	0.000157872	118.89	104.265	413.109	330.317
158	BraA01g039550.3C	166.99	1.74326	0.437699	3.98277	6.81156e-05	0.00460838	63.6574	90.1461	331.286	182.871
159	BraA05g029670.3C	2288.22	1.74416	0.27667	6.30409	2.89886e-10	7.23562e-08	1027.88	1076.32	3357.76	3690.93
160	BraA02g003760.3C	628.514	1.74542	0.382347	4.56503	4.99429e-06	0.000458565	194.717	383.392	780.318	1155.63
161	BraA01g002770.3C	4278.17	1.75242	0.353383	4.95898	7.08637e-07	8.0257e-05	2647.4	1268.56	6344.32	6852.4
162	BraA02g009430.3C	807.293	1.75466	0.317411	5.52805	3.23818e-08	5.20315e-06	311.734	426.836	1118.59	1372.01
163	BraA05g034710.3C	701.335	1.75689	0.330138	5.32167	1.02818e-07	1.42883e-05	278.033	362.756	1271.26	893.291
164	BraA10g017310.3C	1350.02	1.75739	0.289756	6.06509	1.31882e-09	2.82545e-07	561.683	671.208	2185.29	1981.9
165	BraA06g028310.3C	261.385	1.76373	0.36891	4.78093	1.74486e-06	0.000177307	100.167	137.934	457.015	350.423
166	BraA03g021940.3C	5261.47	1.76849	0.275846	6.41116	1.4442e-10	3.78868e-08	2605.27	2170.02	8082.58	8188.02
167	BraA02g011840.3C	5637.46	1.77139	0.370207	4.78487	1.71101e-06	0.000175253	2338.48	2770.63	5319.53	12121.2
168	BraA01g004640.3C	143.3	1.77476	0.428752	4.13935	3.48288e-05	0.00257303	73.0188	56.4771	175.621	268.083
169	BraA04g012330.3C	6070.23	1.77827	0.272834	6.51775	7.13712e-11	1.99444e-08	2866.46	2614.24	9952.54	8847.7
170	BraA06g004600.3C	190.262	1.77994	0.440522	4.04052	5.33325e-05	0.00374624	117.954	53.2188	333.282	256.594
171	BraA06g044080.3C	1540.02	1.78048	0.33402	5.33045	9.79688e-08	1.36885e-05	831.291	557.168	1908.88	2862.74
172	BraA05g008530.3C	220.059	1.78167	0.358822	4.96532	6.85876e-07	7.8023e-05	97.3584	101.007	335.277	346.593
173	BraA08g029330.3C	6166.58	1.7859	0.288902	6.18168	6.34237e-10	1.49593e-07	2571.57	2973.73	8227.26	10893.7
174	BraA09g006120.3C	155.223	1.79015	0.404081	4.43018	9.41524e-06	0.000815005	58.0406	81.4573	231.501	249.892
175	BraA07g038650.3C	758.627	1.7911	0.326431	5.48692	4.09003e-08	6.41162e-06	301.437	379.048	1387.01	967.014
176	BraA06g040090.3C	460.387	1.79372	0.364689	4.91849	8.72155e-07	9.58215e-05	156.335	256.319	837.195	591.698
177	BraA06g031850.3C	1041.59	1.79408	0.344133	5.21332	1.85494e-07	2.43309e-05	359.477	573.459	1918.86	1314.56
178	BraA05g006820.3C	795.447	1.79615	0.361458	4.96918	6.72351e-07	7.71672e-05	471.814	238.941	1155.51	1315.52
179	BraA04g029260.3C	7964.51	1.79633	0.323023	5.561	2.68235e-08	4.42055e-06	4531.85	2589.26	12000.1	12736.8
180	BraA07g027330.3C	144.417	1.80718	0.473427	3.81723	0.000134961	0.00850417	36.5094	92.3183	231.501	217.339
181	BraA09g036520.3C	186.477	1.80798	0.412393	4.38412	1.16453e-05	0.000981594	84.2525	81.4573	212.542	367.657
182	BraA06g028100.3C	132.588	1.81085	0.410068	4.41597	1.00558e-05	0.000864633	58.9768	58.6493	214.537	198.19
183	BraA08g019420.3C	9730.76	1.81201	0.316254	5.72961	1.0066e-08	1.76046e-06	4727.5	3900.18	11563.1	18732.3
184	BraA04g007240.3C	168.999	1.82115	0.390895	4.65892	3.17869e-06	0.000301553	64.5936	84.7156	262.434	264.253
185	BraA03g059440.3C	520.712	1.8371	0.33279	5.52032	3.3839e-08	5.40352e-06	199.398	256.319	932.989	694.144
186	BraA07g015340.3C	526.486	1.85725	0.326498	5.68839	1.28244e-08	2.16909e-06	256.502	198.756	734.417	916.27
187	BraA08g035680.3C	380.415	1.86152	0.357432	5.20805	1.90834e-07	2.47909e-05	189.1	139.02	486.95	706.59
188	BraA06g012060.3C	260.447	1.86195	0.483286	3.85268	0.000116832	0.0075468	116.081	108.61	624.653	192.445
189	BraA03g047260.3C	133.817	1.86641	0.474048	3.93717	8.24466e-05	0.00550551	68.3381	46.7022	139.699	280.53
190	BraA05g024120.3C	220.68	1.87699	0.470751	3.98723	6.68504e-05	0.00454671	124.506	64.0797	212.542	481.592
191	BraA09g045510.3C	495.2	1.87884	0.326859	5.74815	9.02249e-09	1.59972e-06	196.589	226.994	885.092	672.123
192	BraA07g011650.3C	430.144	1.88052	0.329876	5.7007	1.19314e-08	2.04378e-06	209.695	157.484	651.595	701.803
193	BraA03g043240.3C	1789.74	1.88966	0.308723	6.12089	9.30563e-10	2.04477e-07	643.127	878.653	3186.13	2451.05
194	BraA02g026160.3C	1142.38	1.8908	0.313155	6.03792	1.56116e-09	3.26308e-07	512.068	458.333	1468.83	2130.3
195	BraA08g002630.3C	132.994	1.89531	0.419449	4.51856	6.22603e-06	0.000561631	47.7431	65.1658	205.557	213.509
196	BraA06g026170.3C	114.274	1.90075	0.449944	4.22442	2.39561e-05	0.00184397	56.1683	40.1856	207.553	153.19
197	BraA01g017010.3C	638.972	1.90106	0.353115	5.3837	7.29721e-08	1.04224e-05	278.033	261.749	726.434	1289.67
198	BraA03g058520.3C	128.792	1.90466	0.420527	4.52923	5.92001e-06	0.000535907	54.2961	54.3049	180.611	225.956
199	BraA03g031030.3C	290.875	1.90541	0.435383	4.3764	1.20657e-05	0.00100713	131.059	114.04	265.428	652.974
200	BraA10g027020.3C	635.462	1.91238	0.36827	5.19289	2.07058e-07	2.64838e-05	177.866	356.24	1063.71	944.035
201	BraA01g009520.3C	360.499	1.91298	0.349304	5.47656	4.33675e-08	6.71648e-06	122.634	180.292	607.69	531.379
202	BraA06g037770.3C	856.818	1.91582	0.345044	5.5524	2.81767e-08	4.61397e-06	422.199	295.418	1657.43	1052.23
203	BraA07g026510.3C	866.03	1.92164	0.419788	4.57765	4.70231e-06	0.000434862	309.862	413.803	739.406	2001.05
204	BraA07g028290.3C	218.643	1.92448	0.385372	4.99383	5.91938e-07	6.91733e-05	111.401	70.5963	363.217	329.359
205	BraA08g034670.3C	266.603	1.92842	0.390306	4.9408	7.78027e-07	8.69665e-05	143.229	78.199	391.157	453.826
206	BraA05g031950.3C	767.401	1.93187	0.430846	4.48389	7.32954e-06	0.000658864	187.228	450.73	1601.55	830.1
207	BraA03g038530.3C	182.947	1.9343	0.421226	4.59207	4.38876e-06	0.000408807	99.2307	52.1327	265.428	314.998
208	BraA09g012230.3C	450.479	1.93526	0.315306	6.13771	8.37197e-10	1.88803e-07	190.972	182.464	732.421	696.059
209	BraA03g047600.3C	684.235	1.93725	0.304802	6.35578	2.07366e-10	5.38501e-08	286.459	280.213	986.872	1183.4
210	BraA07g036860.3C	346.122	1.93873	0.381305	5.08446	3.68674e-07	4.47087e-05	188.164	97.7488	529.858	568.719
211	BraA10g013010.3C	4796.02	1.94147	0.360093	5.39158	6.9841e-08	1.01412e-05	1245.06	2718.5	7425.99	7794.52
212	BraA05g011140.3C	663.245	1.96234	0.32677	6.00527	1.91013e-09	3.9286e-07	279.906	261.749	1257.29	854.036
213	BraA02g022510.3C	78.5667	1.96663	0.500277	3.93109	8.45624e-05	0.00563216	34.6371	29.3246	104.774	145.531
214	BraA02g011820.3C	717.028	1.97185	0.324296	6.0804	1.19883e-09	2.58998e-07	266.8	316.054	941.969	1343.29
215	BraA02g014130.3C	514.845	1.9816	0.322068	6.15273	7.61602e-10	1.73275e-07	209.695	206.358	930.993	712.335
216	BraA02g018930.3C	1188.76	1.98768	0.346109	5.74293	9.30502e-09	1.63851e-06	477.431	480.055	2467.68	1329.88
217	BraA02g008780.3C	714.446	1.98801	0.304314	6.53275	6.45728e-11	1.86528e-08	286.459	288.902	1250.3	1032.12
218	BraA09g012460.3C	273.434	1.98936	0.406039	4.89944	9.61104e-07	0.000105145	88.9332	131.418	312.327	561.06
219	BraA02g021420.3C	144.073	1.99095	0.433306	4.59478	4.33212e-06	0.000404999	48.6792	67.338	277.402	182.871
220	BraA04g029740.3C	1640.08	1.99151	0.297955	6.68391	2.32655e-11	7.12064e-09	673.084	645.142	2225.2	3016.89
221	BraA02g025470.3C	678.133	2.006	0.340471	5.89182	3.81968e-09	7.27409e-07	329.521	210.703	1226.36	945.95
222	BraA01g014840.3C	2278.84	2.00643	0.285743	7.0218	2.19029e-12	8.40452e-10	863.12	953.593	4021.33	3277.32
223	BraA06g001960.3C	84.7008	2.01365	0.475669	4.2333	2.3029e-05	0.00178329	34.6371	32.5829	133.712	137.871
224	BraA03g027590.3C	339.219	2.01455	0.341463	5.89976	3.64022e-09	7.03657e-07	136.676	132.504	473.978	613.719
225	BraA10g000590.3C	768.09	2.01946	0.374546	5.39176	6.97705e-08	1.01412e-05	412.837	194.411	1127.57	1337.54
226	BraA08g021460.3C	166.342	2.02606	0.427151	4.74319	2.10375e-06	0.000209633	46.8069	84.7156	297.359	236.488
227	BraA07g035160.3C	114.638	2.03145	0.453206	4.4824	7.38071e-06	0.000661152	56.1683	33.669	191.587	177.126
228	BraA09g043880.3C	2287.81	2.03161	0.300541	6.75987	1.38116e-11	4.55233e-09	868.737	929.699	4318.69	3034.13
229	BraA01g013280.3C	1711.52	2.04428	0.285096	7.1705	7.4723e-13	3.04929e-10	608.49	727.685	2809.94	2699.98
230	BraA03g011450.3C	122.148	2.04443	0.449743	4.54578	5.47321e-06	0.000498974	57.1045	38.0134	164.645	228.828
231	BraA01g044260.3C	391.538	2.04472	0.350654	5.83116	5.50441e-09	1.01808e-06	183.483	121.643	687.518	573.506
232	BraA05g038350.3C	288.904	2.04662	0.39298	5.20796	1.90929e-07	2.47909e-05	90.8055	134.676	578.752	351.38
233	BraA09g022500.3C	1510.2	2.05138	0.306104	6.70159	2.0616e-11	6.4636e-09	680.573	493.088	2659.27	2207.86
234	BraA07g018270.3C	192.287	2.06164	0.376868	5.47046	4.48875e-08	6.91025e-06	75.8273	72.7685	334.279	286.274
235	BraA06g025490.3C	208.416	2.07312	0.425817	4.86857	1.12411e-06	0.000119916	63.6574	96.6627	432.069	241.275
236	BraA09g053590.3C	325.421	2.07552	0.416768	4.98004	6.3572e-07	7.36204e-05	174.122	74.9407	459.01	593.613
237	BraA06g040100.3C	191.703	2.0783	0.379004	5.48358	4.16815e-08	6.49449e-06	65.5297	81.4573	316.318	303.508
238	BraAnng003590.3C	526.005	2.08147	0.337067	6.17523	6.60671e-10	1.5302e-07	158.207	244.372	829.212	872.228
239	BraA06g016580.3C	93.9188	2.08446	0.510476	4.08336	4.43888e-05	0.00318768	49.6154	21.7219	138.701	165.637
240	BraA05g004040.3C	973.121	2.09208	0.396427	5.27734	1.31074e-07	1.79243e-05	513.004	225.908	1247.31	1906.26
241	BraA01g002270.3C	158.359	2.09213	0.397408	5.26444	1.40619e-07	1.91278e-05	62.7213	57.5632	235.492	277.657
242	BraA09g061310.3C	110.703	2.0939	0.518679	4.03698	5.41445e-05	0.00377236	60.849	22.808	144.688	214.466
243	BraA10g019840.3C	2898.73	2.1054	0.306613	6.86664	6.57295e-12	2.25312e-09	1049.41	1137.14	3749.92	5658.47
244	BraA06g002980.3C	246.362	2.1059	0.435414	4.83655	1.32112e-06	0.000138068	94.55	91.2322	241.479	558.187
245	BraA09g031640.3C	539.895	2.11047	0.431454	4.89153	1.00056e-06	0.000107629	303.309	102.093	902.055	852.121
246	BraA09g011200.3C	190.881	2.11356	0.389058	5.4325	5.557e-08	8.40382e-06	83.3164	59.7353	332.284	288.189
247	BraA09g059600.3C	156.421	2.11426	0.417614	5.06272	4.13325e-07	4.9655e-05	60.849	56.4771	306.34	202.02
248	BraA01g009270.3C	201.261	2.12908	0.392159	5.42913	5.66302e-08	8.51407e-06	90.8055	58.6493	348.249	307.338
249	BraA10g028150.3C	164.374	2.12962	0.393467	5.41246	6.21651e-08	9.22821e-06	56.1683	66.2519	280.396	254.679
250	BraA07g027310.3C	273.921	2.13541	0.45796	4.66288	3.11808e-06	0.000299114	152.591	49.9605	468.989	424.146
251	BraA09g011560.3C	849.036	2.13974	0.363975	5.87881	4.13233e-09	7.81161e-07	232.162	396.425	1692.35	1075.2
252	BraA07g015350.3C	781.033	2.14071	0.29955	7.1464	8.90809e-13	3.57841e-10	286.459	291.074	1177.46	1369.14
253	BraA03g003810.3C	172.688	2.1425	0.419291	5.10982	3.2247e-07	3.9478e-05	80.5079	46.7022	250.46	313.083
254	BraA01g041540.3C	83.8299	2.15906	0.516638	4.17905	2.92725e-05	0.00220489	22.4673	39.0995	163.647	110.106
255	BraA03g031000.3C	2332.29	2.16873	0.326537	6.64159	3.10318e-11	9.27672e-09	793.846	903.633	4797.66	2834.02
256	BraA08g012680.3C	656.711	2.18027	0.303029	7.19494	6.24862e-13	2.67743e-10	243.396	231.339	1129.56	1022.55
257	BraA03g060860.3C	516.331	2.18059	0.311356	7.00354	2.49577e-12	9.43586e-10	177.866	195.498	855.156	836.802
258	BraA10g026240.3C	296.061	2.18283	0.348521	6.26312	3.77362e-10	9.23961e-08	117.954	95.5766	516.886	453.826
259	BraA06g032430.3C	369.341	2.19347	0.333799	6.57124	4.98975e-11	1.4745e-08	128.251	136.848	665.565	546.698
260	BraA09g000290.3C	590.003	2.1935	0.362262	6.05501	1.40412e-09	2.98335e-07	190.036	233.511	1242.32	694.144
261	BraA10g028210.3C	208.423	2.2008	0.443906	4.95781	7.12927e-07	8.03888e-05	103.911	44.53	395.148	290.104
262	BraA08g019500.3C	201.486	2.20235	0.418752	5.25932	1.44587e-07	1.94617e-05	56.1683	87.9739	407.122	254.679
263	BraA05g013260.3C	1493.28	2.20705	0.28381	7.77649	7.45635e-15	3.99365e-12	535.471	527.843	2602.39	2307.43
264	BraA06g027220.3C	190.31	2.20711	0.432151	5.10727	3.26852e-07	3.98248e-05	92.6778	42.3578	308.335	317.87
265	BraA05g007800.3C	113.077	2.21433	0.447275	4.9507	7.39475e-07	8.30182e-05	42.1263	38.0134	158.658	213.509
266	BraA03g009830.3C	555.597	2.22052	0.467227	4.75255	2.00866e-06	0.000201722	108.592	284.557	556.8	1272.44
267	BraA10g002430.3C	66.1082	2.225	0.540179	4.119	3.80518e-05	0.0027871	29.0203	17.3776	111.759	106.276
268	BraA07g001030.3C	661.75	2.22763	0.409553	5.43917	5.3528e-08	8.14291e-06	252.758	212.875	622.658	1558.71
269	BraA01g033400.3C	69.4093	2.24507	0.522005	4.30085	1.70144e-05	0.00136694	23.4035	24.9802	128.722	100.531
270	BraA10g003150.3C	74.4465	2.25078	0.527827	4.26424	2.0058e-05	0.00157697	30.8926	20.6358	146.684	99.5737
271	BraA08g000320.3C	721.618	2.25509	0.306612	7.35485	1.91139e-13	8.93452e-11	241.524	258.491	1313.17	1073.29
272	BraA09g020720.3C	1239.49	2.25749	0.377902	5.97373	2.31884e-09	4.62132e-07	597.257	259.577	2161.34	1939.77
273	BraA04g025790.3C	148.626	2.26611	0.409495	5.53392	3.13156e-08	5.06348e-06	44.9347	57.5632	233.497	258.509
274	BraA07g027750.3C	152.11	2.27065	0.403028	5.63398	1.76101e-08	2.93985e-06	53.3599	51.0466	270.417	233.615
275	BraA01g015910.3C	267.51	2.27657	0.371922	6.1211	9.29299e-10	2.04477e-07	75.8273	107.524	498.924	387.763
276	BraA07g034050.3C	842.218	2.27977	0.355459	6.41361	1.42117e-10	3.7667e-08	265.863	309.538	1812.09	981.376
277	BraA05g006360.3C	237.826	2.28567	0.399702	5.71842	1.07517e-08	1.86767e-06	103.911	57.5632	353.238	436.592
278	BraA09g017590.3C	563.261	2.28993	0.318465	7.1905	6.45547e-13	2.72071e-10	195.653	186.809	821.23	1049.35
279	BraA01g024740.3C	104.035	2.2946	0.464933	4.93534	8.00121e-07	8.9049e-05	43.0624	27.1524	172.628	173.297
280	BraA04g011840.3C	138.322	2.29575	0.426675	5.38055	7.42582e-08	1.05475e-05	45.8708	47.7883	190.589	269.041
281	BraA01g002570.3C	2276.01	2.30094	0.352313	6.53096	6.53497e-11	1.86675e-08	558.875	977.488	4588.11	2979.55
282	BraA07g000180.3C	336.761	2.31586	0.337367	6.86451	6.67216e-12	2.25703e-09	112.337	112.954	605.694	516.06
283	BraA03g059720.3C	2666.52	2.31596	0.298444	7.7601	8.48618e-15	4.45247e-12	947.373	836.295	3717.98	5164.43
284	BraA06g015790.3C	333.56	2.32111	0.370463	6.26543	3.71803e-10	9.19103e-08	139.485	82.5434	511.896	600.315
285	BraA01g014490.3C	110.472	2.32149	0.4803	4.83343	1.34202e-06	0.000139684	43.0624	30.4107	231.501	136.914
286	BraA08g002470.3C	317.087	2.33056	0.346408	6.72778	1.7227e-11	5.60618e-09	103.911	106.438	591.724	466.273
287	BraA03g040660.3C	238.837	2.35013	0.390314	6.02113	1.73205e-09	3.59106e-07	95.4862	60.8214	344.258	454.784
288	BraA02g008710.3C	355.053	2.35638	0.420564	5.60292	2.10768e-08	3.4959e-06	125.443	106.438	831.208	357.125
289	BraA04g001380.3C	501.46	2.37113	0.343501	6.90282	5.09799e-12	1.77114e-09	146.974	178.12	1003.84	676.91
290	BraA03g021170.3C	471.523	2.37476	0.396024	5.99651	2.01608e-09	4.11361e-07	107.656	197.67	993.857	586.911
291	BraA02g008990.3C	168.741	2.3782	0.417253	5.69967	1.2004e-08	2.04378e-06	68.3381	40.1856	298.357	268.083
292	BraA08g022310.3C	776.199	2.39628	0.460294	5.20599	1.92965e-07	2.49293e-05	388.498	106.438	1155.51	1454.35
293	BraA01g044040.3C	2906.64	2.40323	0.298198	8.05918	7.68061e-16	4.59211e-13	964.223	884.083	5719.67	4058.59
294	BraA06g006960.3C	72.8513	2.42589	0.520505	4.66065	3.15218e-06	0.000301053	18.7228	27.1524	128.722	116.808
295	BraA09g036670.3C	223.068	2.4341	0.397638	6.12139	9.27633e-10	2.04477e-07	88.9332	49.9605	375.191	378.189
296	BraA10g032760.3C	1294.11	2.44331	0.350699	6.96697	3.23838e-12	1.18937e-09	531.727	271.524	2236.18	2137.01
297	BraA03g044400.3C	781.401	2.45207	0.305157	8.03545	9.32399e-16	5.44796e-13	268.672	213.961	1311.17	1331.8
298	BraA03g047620.3C	98.1084	2.47288	0.51702	4.78295	1.7274e-06	0.000176229	33.701	26.0663	223.518	109.148
299	BraA09g057120.3C	1675.39	2.47886	0.315269	7.86269	3.75963e-15	2.05652e-12	602.873	415.975	2489.63	3193.06
300	BraA03g053840.3C	140.333	2.48779	0.490834	5.06851	4.00952e-07	4.83947e-05	62.7213	21.7219	238.486	238.402
301	BraA03g005120.3C	119.107	2.4949	0.44179	5.64726	1.63022e-08	2.7393e-06	41.1901	30.4107	208.55	196.275
302	BraA03g042380.3C	307.759	2.50392	0.376179	6.65619	2.81017e-11	8.49961e-09	73.0188	111.868	441.049	605.102
303	BraA07g041690.3C	1113.22	2.51758	0.363882	6.91868	4.55871e-12	1.60548e-09	412.837	248.716	1414.95	2376.37
304	BraA06g010320.3C	255.74	2.52701	0.427213	5.9151	3.31675e-09	6.45987e-07	87.9971	62.9936	584.739	287.232
305	BraA02g000270.3C	358.113	2.52883	0.339104	7.45738	8.82623e-14	4.53827e-11	110.464	101.007	549.815	671.165
306	BraA06g013410.3C	67.446	2.53406	0.543787	4.66003	3.16171e-06	0.000301053	24.3396	15.2054	105.772	124.467
307	BraA04g028090.3C	545.878	2.54432	0.34479	7.37933	1.59091e-13	7.57422e-11	124.506	195.498	1024.79	838.717
308	BraA10g033400.3C	235.464	2.54948	0.429005	5.94277	2.80237e-09	5.49971e-07	94.55	42.3578	348.249	456.699
309	BraA02g023560.3C	250.68	2.55948	0.391192	6.54276	6.03929e-11	1.76437e-08	75.8273	69.5102	531.853	325.529
310	BraA06g012940.3C	135.629	2.56973	0.499399	5.14564	2.66609e-07	3.32731e-05	57.1045	20.6358	270.417	194.36
311	BraA03g042950.3C	5371.72	2.57073	0.272176	9.44511	3.55036e-21	8.29783e-18	1530.59	1565.07	8647.36	9743.86
312	BraA09g054360.3C	525.948	2.57155	0.496719	5.17707	2.25398e-07	2.86869e-05	191.908	110.782	382.176	1418.93
313	BraA03g007300.3C	6301.97	2.57715	0.280106	9.20061	3.55937e-20	6.53627e-17	1597.05	2021.23	10788.7	10800.9
314	BraA07g043020.3C	2904.1	2.5774	0.351749	7.3274	2.34667e-13	1.05843e-10	580.406	1087.18	5817.46	4131.35
315	BraA09g050760.3C	48.1098	2.57869	0.663182	3.88836	0.000100924	0.00658544	18.7228	8.68878	55.8795	109.148
316	BraA05g038320.3C	353.889	2.5885	0.3729	6.94153	3.87876e-12	1.38499e-09	80.5079	121.643	717.453	495.954
317	BraA08g030540.3C	182.023	2.59369	0.399006	6.50039	8.01101e-11	2.21457e-08	60.849	42.3578	299.355	325.529
318	BraA02g043370.3C	245.288	2.6061	0.449108	5.80283	6.52065e-09	1.18893e-06	72.0827	66.2519	597.711	245.105
319	BraA03g029760.3C	1604.05	2.61453	0.318769	8.20196	2.36501e-16	1.6433e-13	347.308	553.91	2651.28	2863.7
320	BraA08g016550.3C	5175.49	2.6171	0.323964	8.07836	6.56461e-16	4.21924e-13	1832.02	1068.72	8216.29	9584.93
321	BraA05g004090.3C	528.637	2.62468	0.420857	6.23652	4.4742e-10	1.06507e-07	79.5718	216.133	820.232	998.61
322	BraA03g042980.3C	115.745	2.63584	0.447172	5.89447	3.75888e-09	7.21171e-07	33.701	30.4107	179.613	219.254
323	BraA04g024120.3C	53.1704	2.64403	0.593592	4.45429	8.41707e-06	0.000745842	13.1059	16.2915	104.774	78.5101
324	BraA03g014760.3C	673.875	2.65142	0.309619	8.56351	1.09481e-17	1.19098e-14	199.398	170.517	1086.66	1238.93
325	BraA07g029200.3C	147.277	2.65864	0.446	5.96109	2.50563e-09	4.95517e-07	47.7431	32.5829	198.572	310.21
326	BraA02g009470.3C	3181.51	2.6663	0.330719	8.06214	7.49702e-16	4.58907e-13	684.318	1048.08	6580.81	4412.84
327	BraA07g016220.3C	239.737	2.66655	0.366319	7.27933	3.35485e-13	1.46186e-10	58.9768	71.6824	428.077	400.21
328	BraA08g016300.3C	351.281	2.68961	0.378662	7.10294	1.22129e-12	4.83046e-10	82.3802	106.438	458.013	758.292
329	BraA07g040200.3C	101.206	2.6903	0.466833	5.76287	8.26965e-09	1.48674e-06	27.148	27.1524	191.587	158.935
330	BraA07g040190.3C	1708.07	2.6939	0.321021	8.39166	4.79322e-17	3.85091e-14	432.496	482.227	2284.08	3633.48
331	BraA10g021100.3C	3036.28	2.69751	0.32699	8.24953	1.59015e-16	1.13559e-13	650.617	972.057	6269.48	4252.95
332	BraA01g004240.3C	46.1835	2.69996	0.671353	4.02167	5.7786e-05	0.0039829	16.8505	7.60268	56.8774	103.403
333	BraA06g041730.3C	496.71	2.70028	0.34015	7.93852	2.04608e-15	1.16895e-12	144.165	120.557	1008.83	713.293
334	BraA09g059040.3C	77.4829	2.72648	0.558581	4.88109	1.05502e-06	0.000113015	25.2758	15.2054	175.621	93.8291
335	BraA10g029880.3C	72.4211	2.73439	0.546164	5.00653	5.54191e-07	6.53565e-05	13.1059	24.9802	136.705	114.893
336	BraA08g015700.3C	48.7867	2.74303	0.688587	3.98357	6.78871e-05	0.00460504	19.6589	5.43049	61.8666	108.191
337	BraA06g035910.3C	1009.56	2.74953	0.331446	8.29555	1.08087e-16	8.17294e-14	226.546	296.505	2114.44	1400.73
338	BraA02g043360.3C	109.352	2.75147	0.561941	4.89637	9.76246e-07	0.000105455	34.6371	21.7219	283.389	97.6588
339	BraA09g040600.3C	50.3213	2.77054	0.636792	4.35077	1.35662e-05	0.00111429	16.8505	8.68878	107.768	67.9782
340	BraA01g009230.3C	108.27	2.7736	0.455751	6.08578	1.15925e-09	2.52569e-07	28.0842	27.1524	180.611	197.233
341	BraA01g036690.3C	1015.9	2.77589	0.326296	8.5073	1.78038e-17	1.76045e-14	202.206	316.054	1913.87	1631.48
342	BraA05g006080.3C	128.925	2.79059	0.483464	5.77208	7.82999e-09	1.41761e-06	26.2119	39.0995	293.368	157.02
343	BraA09g021180.3C	1213.32	2.79585	0.295506	9.4612	3.04424e-21	7.82644e-18	308.926	301.935	2340.95	1901.48
344	BraA09g040260.3C	52.7414	2.81844	0.713286	3.95135	7.77119e-05	0.0052088	21.5312	4.34439	125.729	59.3613
345	BraA02g015030.3C	112.118	2.82103	0.538057	5.24299	1.57992e-07	2.09901e-05	42.1263	13.0332	160.654	232.658
346	BraA10g033570.3C	99.8721	2.83942	0.484103	5.86532	4.48277e-09	8.41222e-07	27.148	21.7219	146.684	203.935
347	BraA03g014070.3C	216.381	2.8771	0.408581	7.0417	1.89914e-12	7.39772e-10	67.402	35.8412	382.176	380.104
348	BraA01g040660.3C	75.61	2.87732	0.52381	5.49307	3.95014e-08	6.23031e-06	17.7866	18.4637	118.744	147.446
349	BraA01g038870.3C	45.2176	2.88402	0.687369	4.19574	2.71979e-05	0.00206873	15.9144	5.43049	61.8666	97.6588
350	BraA02g001730.3C	48.3489	2.88413	0.663429	4.34731	1.3782e-05	0.00112842	12.1698	10.861	116.748	53.6166
351	BraA06g030090.3C	2093.02	2.89891	0.417453	6.94429	3.80365e-12	1.3773e-09	700.232	288.902	2556.49	4826.45
352	BraA01g002330.3C	252.713	2.90768	0.485795	5.98541	2.15851e-09	4.33541e-07	73.0188	45.6161	233.497	658.718
353	BraA03g012920.3C	49.8082	2.91183	0.688679	4.22815	2.35624e-05	0.00181911	18.7228	4.34439	70.8473	105.318
354	BraA08g018110.3C	629.476	2.91392	0.340342	8.56174	1.11181e-17	1.19098e-14	182.547	111.868	1071.69	1151.8
355	BraA02g020820.3C	628.471	2.91517	0.391594	7.44436	9.74128e-14	4.81613e-11	105.784	188.981	798.279	1420.84
356	BraA04g020810.3C	178.324	2.9208	0.459914	6.35075	2.14271e-10	5.50868e-08	35.5733	47.7883	424.086	205.85
357	BraA01g003500.3C	190.01	2.92961	0.468853	6.24847	4.14488e-10	1.00529e-07	62.7213	24.9802	265.428	406.912
358	BraA06g015130.3C	500.016	2.93787	0.475456	6.17907	6.44805e-10	1.50703e-07	183.483	46.7022	793.29	976.588
359	BraA02g009480.3C	486.888	2.9393	0.351566	8.3606	6.24026e-17	4.86154e-14	109.528	115.126	1051.73	671.165
360	BraA06g019700.3C	172.348	2.97099	0.405275	7.3308	2.28779e-13	1.0503e-10	43.0624	34.7551	325.299	286.274
361	BraA09g065840.3C	9015.19	2.98466	0.351758	8.48497	2.15779e-17	1.98124e-14	2736.33	1307.66	16573.3	15443.5
362	BraA06g033180.3C	941.649	2.99773	0.344667	8.69747	3.39351e-18	4.59177e-15	233.099	185.723	2094.48	1253.29
363	BraA10g011230.3C	115.102	3.01139	0.461731	6.52196	6.93931e-11	1.96047e-08	29.9564	20.6358	213.54	196.275
364	BraA01g007360.3C	571.518	3.03834	0.358991	8.46355	2.59355e-17	2.15089e-14	118.89	129.246	1289.22	748.718
365	BraA09g008560.3C	1427.03	3.06753	0.370702	8.27493	1.28533e-16	9.4413e-14	417.518	190.067	2322.99	2777.53
366	BraA03g059850.3C	349.834	3.07882	0.413347	7.44851	9.43999e-14	4.75868e-11	79.5718	68.4241	401.135	850.206
367	BraA07g010040.3C	671.413	3.08552	0.309835	9.95859	2.31313e-23	8.49547e-20	130.123	153.14	1186.44	1215.95
368	BraA01g033090.3C	120.639	3.09716	0.567137	5.46104	4.73349e-08	7.24365e-06	40.254	9.77488	159.656	272.87
369	BraA10g018650.3C	3032.24	3.09886	0.341998	9.06104	1.29211e-19	2.20982e-16	802.271	464.85	4460.38	6401.44
370	BraA09g005650.3C	492.423	3.14361	0.425398	7.3898	1.47049e-13	7.13299e-11	136.676	62.9936	1151.52	618.506
371	BraA05g009180.3C	407.93	3.15231	0.371723	8.48026	2.24693e-17	1.99194e-14	105.784	58.6493	792.292	674.995
372	BraA01g038200.3C	1510.6	3.18082	0.374122	8.50211	1.86182e-17	1.7728e-14	237.779	362.756	3612.21	1829.67
373	BraA03g033660.3C	637.062	3.18468	0.358954	8.8721	7.17765e-19	1.08547e-15	102.975	149.881	1404.97	890.419
374	BraA07g030330.3C	360.745	3.189	0.367083	8.68741	3.70805e-18	4.76652e-15	73.0188	69.5102	786.305	514.145
375	BraA03g057220.3C	56.756	3.21321	0.625897	5.13378	2.83986e-07	3.5101e-05	11.2337	10.861	71.8451	133.084
376	BraA03g018550.3C	82.886	3.2465	0.542246	5.98714	2.13567e-09	4.32331e-07	21.5312	9.77488	155.664	144.573
377	BraA09g002590.3C	1884.48	3.25711	0.288524	11.2889	1.48946e-29	1.27642e-25	394.114	319.313	3400.67	3423.8
378	BraA05g033880.3C	1695.29	3.27832	0.362076	9.05423	1.37528e-19	2.20982e-16	294.884	338.862	4130.1	2017.33
379	BraA09g056070.3C	80.7638	3.31932	0.548462	6.05205	1.43013e-09	3.01371e-07	12.1698	17.3776	178.615	114.893
380	BraA09g032090.3C	1015.54	3.32269	0.422554	7.86334	3.74036e-15	2.05652e-12	277.097	91.2322	1962.77	1731.05
381	BraA02g045060.3C	216.205	3.36396	0.415808	8.09016	5.95847e-16	3.92785e-13	45.8708	30.4107	321.307	467.231
382	BraA03g050480.3C	395.122	3.37375	0.395708	8.52586	1.51681e-17	1.55983e-14	83.3164	55.391	919.019	522.762
383	BraA06g042860.3C	2416.07	3.42629	0.286269	11.9688	5.17966e-33	6.65819e-29	368.839	453.989	4550.19	4291.24
384	BraA03g018120.3C	50.9257	3.44743	0.635749	5.42263	5.87295e-08	8.77835e-06	8.42525	8.68878	91.8021	94.7865
385	BraA06g013660.3C	31.2171	3.47962	0.861932	4.037	5.41396e-05	0.00377236	2.80842	7.60268	83.8193	30.6381
386	BraA04g001930.3C	42.2655	3.49431	0.71858	4.86279	1.15742e-06	0.000122453	10.2975	3.25829	80.8258	74.6803
387	BraA05g010730.3C	54.7212	3.51519	0.679326	5.17452	2.28498e-07	2.89382e-05	14.0421	3.25829	83.8193	117.765
388	BraA03g027160.3C	113.962	3.54997	0.487187	7.28666	3.17727e-13	1.40835e-10	21.5312	14.1193	233.497	186.701
389	BraA10g031980.3C	43.4299	3.5893	0.739503	4.85367	1.21198e-06	0.000127179	3.74456	9.77488	54.8817	105.318
390	BraA10g017550.3C	28.5835	3.60477	0.928653	3.88171	0.000103723	0.00675091	8.42525	0	61.8666	44.0422
391	BraA01g006130.3C	858.884	3.61655	0.411209	8.79492	1.43149e-18	2.04456e-15	184.419	73.8546	1926.85	1250.42
392	BraA02g025510.3C	80.3116	3.64539	0.563601	6.46803	9.92912e-11	2.71561e-08	15.9144	7.60268	164.645	133.084
393	BraA06g026140.3C	1679.01	3.70277	0.290016	12.7675	2.49154e-37	6.4055e-33	236.843	242.2	2866.82	3370.19
394	BraA05g012140.3C	65.4109	3.72184	0.646315	5.75855	8.48412e-09	1.51471e-06	5.61683	13.0332	160.654	82.3398
395	BraA04g028460.3C	275.032	3.73541	0.381283	9.79696	1.16026e-22	3.72863e-19	43.9985	32.5829	473.978	549.57
396	BraA03g019710.3C	27.993	3.73817	0.965241	3.87278	0.000107601	0.00698562	6.55297	1.0861	22.9505	81.3824
397	BraA01g019110.3C	145.411	3.91223	0.454886	8.60047	7.93894e-18	9.27737e-15	17.7866	18.4637	251.458	293.934
398	BraA03g045760.3C	33.1081	3.93122	0.859908	4.57167	4.83845e-06	0.000445849	2.80842	5.43049	87.8107	36.3827
399	BraA10g027040.3C	1267.79	3.93945	0.389552	10.1128	4.8502e-24	2.49388e-20	150.718	159.656	1427.92	3332.85
400	BraA02g043750.3C	1390.29	3.98237	0.420006	9.48169	2.50191e-21	7.14685e-18	244.332	85.8017	3110.29	2120.73
401	BraA07g031300.3C	2687.21	3.9996	0.391976	10.2037	1.90909e-24	1.22702e-20	450.283	181.378	4253.83	5863.36
402	BraA02g018800.3C	26.6224	4.03726	0.921032	4.38341	1.16834e-05	0.000981594	1.87228	4.34439	40.9118	59.3613
403	BraA07g026010.3C	79.0054	4.04274	0.578466	6.98873	2.77395e-12	1.03356e-09	9.36139	8.68878	170.632	127.339
404	BraA02g004310.3C	122.629	4.10453	0.504199	8.1407	3.92991e-16	2.65879e-13	15.9144	10.861	268.421	195.318
405	BraA09g035710.3C	236.674	4.14112	0.489021	8.46817	2.49269e-17	2.13616e-14	39.3178	10.861	528.86	367.657
406	BraA05g014680.3C	89.1405	4.24491	0.788257	5.38518	7.23728e-08	1.03946e-05	11.2337	6.51658	304.344	34.4678
407	BraA01g003520.3C	24.3539	4.24593	1.01611	4.1786	2.93311e-05	0.00220489	4.68069	0	43.9053	48.8294
408	BraA07g027340.3C	167.741	4.27307	0.461705	9.25499	2.14259e-20	4.23721e-17	18.7228	14.1193	366.211	271.913
409	BraA06g001970.3C	204.229	4.27698	0.530404	8.06362	7.40655e-16	4.58907e-13	30.8926	8.68878	257.445	519.89
410	BraA10g027780.3C	69.9314	4.38576	0.682541	6.42564	1.31315e-10	3.51666e-08	10.2975	2.17219	97.7892	169.467
411	BraA07g016850.3C	44.9708	4.42478	0.760571	5.81771	5.96592e-09	1.09556e-06	4.68069	3.25829	84.8171	87.127
412	BraA03g028380.3C	187.908	4.49789	0.481306	9.34519	9.17268e-21	1.96517e-17	19.6589	11.9471	450.03	269.998
413	BraA08g021610.3C	144.741	4.5649	0.529338	8.6238	6.47684e-18	7.9292e-15	7.48911	16.2915	209.548	345.636
414	BraA09g031610.3C	57.5982	4.81761	0.760663	6.33344	2.39758e-10	6.10292e-08	6.55297	1.0861	133.712	89.0419
415	BraA01g018560.3C	191.056	5.01846	0.498325	10.0706	7.44897e-24	3.19176e-20	14.9782	7.60268	440.051	301.593
416	BraA07g016090.3C	69.2888	5.27388	0.735273	7.17268	7.3543e-13	3.04929e-10	4.68069	2.17219	125.729	144.573
417	BraA09g052300.3C	37.4951	5.62988	1.05532	5.33477	9.56651e-08	1.34396e-05	2.80842	0	87.8107	59.3613
