# Supplementary material for: Application of Long-Chained Auxin Conjugates Influenced Auxin Metabolism and Transcriptome Response in Brassica rapa L. ssp. pekinensis
Source: Int J Mol Sci. 2023 Dec 28;25(1):447. doi: 10.3390/ijms25010447 (PMC10778880; doi:10.3390/ijms25010447)
Supplement: Supplementary file 1 [file ijms-25-00447-s001.zip › Table S3.xlsx]

## Sheet: DESeq2_iba_new-resultsSignifica
	gene	baseMean	log2FoldChange	lfcSE	stat	pvalue	padj	Control1	Control2	IBA-Ala1	IBA-Ala2
1	BraA02g001260.3C	113.496	-10.3606	1.50822	-6.86943	6.44574e-12	1.58884e-09	244.437	209.549	0	0
2	BraA07g028340.3C	13.8996	-7.32703	1.79254	-4.08752	4.36002e-05	0.00203326	13.6885	41.9098	0	0
3	BraA03g042710.3C	46.1227	-4.37551	0.782216	-5.59373	2.22238e-08	2.43728e-06	61.5981	114.402	2.77682	5.71368
4	BraA02g001050.3C	23.7097	-3.99103	0.989873	-4.03186	5.53361e-05	0.00243994	37.1544	52.104	4.62804	0.952279
5	BraA03g015360.3C	39.9529	-3.59499	0.746072	-4.81856	1.44595e-06	0.000101696	90.9306	56.6348	4.62804	7.61823
6	BraA07g032100.3C	44.9252	-3.56528	0.7391	-4.82381	1.4084e-06	9.95962e-05	97.7748	67.9618	11.1073	2.85684
7	BraA01g013470.3C	335.075	-2.9801	0.492997	-6.04486	1.49544e-09	2.06979e-07	885.84	303.563	50.9084	99.9893
8	BraA01g000460.3C	67.908	-2.95913	0.55473	-5.33436	9.58844e-08	8.8316e-06	125.152	115.535	16.6609	14.2842
9	BraA06g041620.3C	30.6716	-2.9423	0.781486	-3.765	0.000166548	0.00593745	43.9987	64.5637	5.55364	8.57051
10	BraA03g050560.3C	99.6524	-2.81159	0.518181	-5.42589	5.76663e-08	5.63847e-06	228.793	120.066	24.9914	24.7593
11	BraA09g019440.3C	1084.43	-2.80985	0.451731	-6.22017	4.96603e-10	7.69645e-08	2763.12	1033.02	174.94	366.628
12	BraA08g035120.3C	1301.07	-2.79067	0.487569	-5.72363	1.0427e-08	1.24053e-06	2699.56	1847.43	124.031	533.276
13	BraA01g017810.3C	48.3323	-2.72192	0.646988	-4.20706	2.5871e-05	0.0012879	77.2421	90.6157	8.33047	17.141
14	BraA09g009970.3C	316.071	-2.64841	0.366071	-7.23469	4.66584e-13	1.37229e-10	452.697	637.708	79.6022	94.2757
15	BraA10g030360.3C	280.824	-2.63085	0.393077	-6.69295	2.18722e-11	4.64013e-09	580.782	386.249	62.9413	93.3234
16	BraA01g025410.3C	104.54	-2.58861	0.673439	-3.84387	0.00012111	0.00460289	67.4646	291.103	13.8841	45.7094
17	BraA03g041940.3C	2331.33	-2.56598	0.346327	-7.40913	1.27132e-13	4.01273e-11	2862.85	5115.26	570.174	777.06
18	BraA04g015380.3C	651.294	-2.50345	0.457687	-5.46978	4.506e-08	4.64639e-06	871.174	1343.38	92.5607	298.063
19	BraA09g003290.3C	2206.04	-2.44089	0.3488	-6.99796	2.59721e-12	6.79e-10	3118.04	4333.7	488.721	883.715
20	BraA08g009740.3C	572.495	-2.40844	0.368433	-6.53698	6.27738e-11	1.22159e-08	970.904	955.996	123.106	239.974
21	BraA09g000010.3C	77.0279	-2.37101	0.53431	-4.43753	9.0999e-06	0.000523386	107.552	150.649	19.4378	30.4729
22	BraA02g006880.3C	398.339	-2.36915	0.394674	-6.0028	1.93946e-09	2.60088e-07	718.645	616.187	83.3047	175.219
23	BraA04g015630.3C	476.503	-2.35793	0.391112	-6.02879	1.65191e-09	2.27419e-07	628.692	966.19	108.296	202.835
24	BraA10g020020.3C	630.677	-2.34776	0.474936	-4.94332	7.68034e-07	5.7286e-05	718.645	1389.82	99.04	315.204
25	BraA07g022010.3C	500.837	-2.30423	0.365612	-6.3024	2.93071e-10	4.97165e-08	902.462	763.437	120.329	217.12
26	BraA06g007530.3C	127.845	-2.30369	0.447893	-5.1434	2.69805e-07	2.25261e-05	232.704	192.558	51.834	34.2821
27	BraA03g050570.3C	147.127	-2.2588	0.447882	-5.0433	4.57579e-07	3.59972e-05	194.572	292.236	39.8011	61.8982
28	BraA07g012090.3C	93.4089	-2.24327	0.593352	-3.78067	0.000156407	0.00566965	83.1086	225.407	20.3634	44.7571
29	BraA09g038610.3C	69.2283	-2.21882	0.544834	-4.07247	4.6517e-05	0.00214558	105.597	122.331	18.5121	30.4729
30	BraA09g010360.3C	376.635	-2.20177	0.357795	-6.15372	7.56841e-10	1.12578e-07	510.385	727.191	117.552	151.412
31	BraA03g005990.3C	243.234	-2.19952	0.376831	-5.83688	5.31873e-09	6.7151e-07	440.964	357.932	74.0486	99.9893
32	BraA05g036590.3C	153.999	-2.18206	0.458847	-4.75553	1.97927e-06	0.000136972	195.55	309.226	39.8011	71.4209
33	BraA03g027930.3C	120.942	-2.17978	0.491356	-4.43625	9.15381e-06	0.000525319	129.063	267.316	40.7267	46.6617
34	BraA03g042340.3C	508.506	-2.15782	0.408671	-5.28009	1.29118e-07	1.15634e-05	499.629	1162.15	168.461	203.788
35	BraA10g024990.3C	408.566	-2.09713	0.346892	-6.04549	1.48959e-09	2.06979e-07	604.248	720.395	127.734	181.885
36	BraA10g032170.3C	976.008	-2.09205	0.381352	-5.48588	4.11425e-08	4.27651e-06	1373.74	1788.53	233.253	508.517
37	BraA06g024940.3C	384.19	-2.0916	0.374308	-5.58791	2.29825e-08	2.50984e-06	680.513	564.083	105.519	186.647
38	BraA05g010690.3C	951.492	-2.08795	0.330591	-6.31579	2.6878e-10	4.607e-08	1205.56	1875.74	331.367	393.291
39	BraA02g006200.3C	491.088	-2.06433	0.41508	-4.97333	6.58134e-07	5.00995e-05	538.739	1046.61	132.362	246.64
40	BraA06g037410.3C	348.1	-2.04614	0.336145	-6.08708	1.14991e-09	1.65448e-07	524.073	596.931	132.362	139.033
41	BraA01g006090.3C	77.6661	-2.02928	0.513571	-3.95132	7.77215e-05	0.00317062	133.952	115.535	24.9914	36.1866
42	BraA05g001130.3C	135.381	-2.01055	0.509463	-3.94641	7.93308e-05	0.00320819	164.262	269.582	30.545	77.1346
43	BraA02g043150.3C	864.645	-2.00298	0.445918	-4.49181	7.06204e-06	0.000422124	908.328	1859.89	497.051	193.313
44	BraA07g033020.3C	580.659	-1.99306	0.432932	-4.60363	4.15183e-06	0.000264674	485.941	1370.56	248.063	218.072
45	BraA09g048440.3C	126.251	-1.9495	0.515754	-3.77991	0.000156886	0.00567904	141.773	259.387	31.4707	72.3732
46	BraA09g009870.3C	5288.52	-1.93922	0.392973	-4.93474	8.0258e-07	5.95197e-05	4736.21	12042.8	1906.75	2468.31
47	BraA02g037860.3C	1213.96	-1.92857	0.353017	-5.4631	4.67883e-08	4.76762e-06	1435.33	2410.38	404.49	605.65
48	BraA01g036020.3C	96.9132	-1.8848	0.463908	-4.06287	4.84728e-05	0.00222442	162.306	142.72	40.7267	41.9003
49	BraA07g036960.3C	11221.1	-1.88272	0.336576	-5.59374	2.22236e-08	2.43728e-06	14323	20986.6	3576.55	5998.41
50	BraA08g011150.3C	81.1112	-1.8783	0.497767	-3.77345	0.000161008	0.00575582	141.773	113.27	37.0243	32.3775
51	BraA10g027700.3C	112.753	-1.86884	0.463518	-4.03186	5.53374e-05	0.00243994	145.684	208.416	40.7267	56.1845
52	BraA08g023650.3C	4372.94	-1.86823	0.304008	-6.14533	7.97974e-10	1.17348e-07	5543.83	8187.13	2006.72	1754.1
53	BraA03g007360.3C	579.174	-1.85636	0.427533	-4.34202	1.41179e-05	0.000775794	537.762	1277.68	186.047	315.204
54	BraA04g024630.3C	8337.67	-1.84799	0.331459	-5.57531	2.47091e-08	2.67582e-06	9256.34	16844.3	3425.67	3824.35
55	BraA03g054450.3C	93.2131	-1.83884	0.485593	-3.78679	0.000152604	0.00555877	140.796	150.649	49.9828	31.4252
56	BraA10g012360.3C	1921.81	-1.83702	0.372798	-4.92764	8.3228e-07	6.13705e-05	3850.37	2155.52	608.124	1073.22
57	BraA01g009050.3C	129.254	-1.83698	0.453614	-4.04966	5.12917e-05	0.00230075	188.705	215.212	40.7267	72.3732
58	BraA01g006200.3C	713.115	-1.82111	0.339425	-5.36529	8.08175e-08	7.69015e-06	1045.21	1178	238.807	390.435
59	BraA03g018080.3C	6841.1	-1.81301	0.340341	-5.32703	9.98304e-08	9.13007e-06	7257.83	14044.3	3005.45	3056.82
60	BraA05g006330.3C	1354.34	-1.81172	0.296313	-6.1142	9.70413e-10	1.419e-07	1890.97	2325.43	556.29	644.693
61	BraA05g032060.3C	349.609	-1.81071	0.404318	-4.47844	7.51918e-06	0.000446357	423.365	664.893	108.296	201.883
62	BraA02g005190.3C	1170.51	-1.79532	0.328334	-5.46798	4.55186e-08	4.65941e-06	1959.41	1675.26	401.714	645.645
63	BraA01g022270.3C	474.705	-1.79316	0.330655	-5.42305	5.85909e-08	5.70094e-06	707.89	765.703	180.493	244.736
64	BraA06g012020.3C	277.872	-1.79262	0.405996	-4.41537	1.00839e-05	0.000572351	433.142	429.292	81.4535	167.601
65	BraA10g023370.3C	692.815	-1.78768	0.436113	-4.09912	4.14724e-05	0.00195517	570.027	1578.98	249.914	372.341
66	BraA08g035330.3C	423.554	-1.7848	0.387739	-4.6031	4.16254e-06	0.000264705	454.653	858.584	162.907	218.072
67	BraA02g034070.3C	274.613	-1.7833	0.356341	-5.00449	5.60093e-07	4.30158e-05	396.966	454.211	110.147	137.128
68	BraA04g027940.3C	3294.77	-1.77798	0.346407	-5.13264	2.85712e-07	2.35503e-05	4750.88	5452.8	1007.99	1967.41
69	BraA02g007630.3C	356.473	-1.77527	0.381226	-4.65673	3.21267e-06	0.00021136	534.828	568.613	111.998	210.454
70	BraA09g045720.3C	2390.4	-1.77285	0.298961	-5.93004	3.0286e-09	3.91931e-07	3148.35	4248.74	992.251	1172.26
71	BraA09g035160.3C	9672.96	-1.77029	0.320412	-5.52504	3.29409e-08	3.45173e-06	11017.3	18903.6	4476.24	4294.78
72	BraA03g035300.3C	425.262	-1.75835	0.425471	-4.13272	3.58492e-05	0.00173436	527.984	784.958	113.85	274.256
73	BraA02g000110.3C	134.215	-1.74554	0.439383	-3.97271	7.10606e-05	0.002938	177.95	235.601	49.9828	73.3255
74	BraA03g047370.3C	216.994	-1.73762	0.376484	-4.61538	3.92379e-06	0.000251999	296.258	371.524	91.6351	108.56
75	BraA03g023380.3C	211.574	-1.7189	0.434034	-3.96028	7.48625e-05	0.00306968	321.679	327.349	61.0901	136.176
76	BraA05g023760.3C	448.898	-1.69651	0.399626	-4.24526	2.18342e-05	0.00113249	518.207	854.053	147.172	276.161
77	BraA07g011060.3C	326.625	-1.68492	0.352108	-4.78524	1.70785e-06	0.000119466	573.938	422.496	145.32	164.744
78	BraA01g017270.3C	894.687	-1.67545	0.397743	-4.21239	2.52677e-05	0.0012674	855.53	1870.08	334.144	518.992
79	BraA04g029990.3C	181.57	-1.66523	0.398314	-4.18069	2.90629e-05	0.00143551	261.059	291.103	71.2718	102.846
80	BraA07g012400.3C	115.973	-1.65088	0.453746	-3.63834	0.000274399	0.00898988	167.195	184.629	43.5035	68.5641
81	BraA07g028670.3C	106.585	-1.64212	0.453001	-3.62498	0.000288982	0.00941995	149.595	173.303	45.3548	58.089
82	BraA06g016980.3C	545.878	-1.64081	0.319976	-5.12791	2.92981e-07	2.39209e-05	752.866	900.493	240.658	289.493
83	BraA09g053360.3C	268.357	-1.63352	0.368079	-4.43797	9.08095e-06	0.000523386	402.832	408.903	105.519	156.174
84	BraA10g012410.3C	4699.08	-1.6228	0.285439	-5.68527	1.30607e-08	1.51586e-06	6211.63	7977.58	2413.06	2194.05
85	BraA06g039240.3C	180.276	-1.62021	0.404125	-4.00917	6.09317e-05	0.00261098	262.037	282.041	69.4206	107.608
86	BraA09g025060.3C	837.539	-1.61801	0.325522	-4.9705	6.67817e-07	5.05393e-05	1509.64	1017.16	442.44	380.912
87	BraA01g007990.3C	4901.32	-1.61342	0.324387	-4.97377	6.56639e-07	5.00995e-05	7826.87	6949.09	1774.39	3054.91
88	BraA05g022470.3C	1547.12	-1.61127	0.325306	-4.95307	7.30511e-07	5.48031e-05	2257.62	2404.71	574.802	951.327
89	BraA03g029790.3C	280.838	-1.60444	0.403089	-3.98037	6.8808e-05	0.00285399	333.412	511.979	102.742	175.219
90	BraA09g015380.3C	113.782	-1.60372	0.435212	-3.68491	0.000228783	0.00775047	169.15	173.303	55.5364	57.1368
91	BraA02g008980.3C	13838.5	-1.60148	0.319742	-5.00865	5.48131e-07	4.23485e-05	19394.6	22239.4	5101.02	8619.08
92	BraA06g026240.3C	188.664	-1.59973	0.415932	-3.84612	0.000120001	0.00457963	214.127	353.401	82.3791	104.751
93	BraA07g038380.3C	2948.36	-1.59047	0.369301	-4.3067	1.65709e-05	0.000889812	3041.77	5811.86	1119.06	1820.76
94	BraA10g023800.3C	790.855	-1.57001	0.35348	-4.44157	8.93031e-06	0.000518239	977.748	1388.69	299.897	497.09
95	BraA01g015930.3C	228.684	-1.56399	0.387546	-4.03562	5.4459e-05	0.00242183	375.455	308.093	139.767	91.4188
96	BraA07g021900.3C	3250.61	-1.56348	0.346694	-4.50968	6.49264e-06	0.000388988	3270.57	6445.04	1601.3	1685.53
97	BraA08g022010.3C	283.25	-1.55785	0.344013	-4.52847	5.94133e-06	0.000359284	409.677	436.088	144.395	142.842
98	BraA10g027430.3C	623.458	-1.55517	0.428725	-3.62743	0.000286254	0.00934278	486.919	1373.96	308.227	324.727
99	BraA07g014340.3C	269.298	-1.55506	0.351897	-4.41907	9.91259e-06	0.000565105	403.81	399.842	124.031	149.508
100	BraA04g009990.3C	289.583	-1.53974	0.379839	-4.05367	5.04203e-05	0.00228108	343.19	518.775	124.957	171.41
101	BraA01g022500.3C	463.528	-1.53296	0.344188	-4.45383	8.43502e-06	0.000493925	754.822	622.983	192.526	283.779
102	BraA08g006950.3C	6187.87	-1.52726	0.347188	-4.39893	1.08786e-05	0.000609436	6572.42	11803.8	2588	3787.21
103	BraA03g009710.3C	16410.8	-1.52244	0.296759	-5.13023	2.89388e-07	2.37776e-05	23746.6	24946.5	6862.45	10087.5
104	BraA09g025580.3C	267.044	-1.51283	0.397246	-3.80828	0.000139935	0.00518142	498.652	292.236	159.204	118.083
105	BraA01g017580.3C	3591.44	-1.51086	0.324469	-4.65642	3.21752e-06	0.00021136	4048.86	6585.5	1639.25	2092.16
106	BraA07g009680.3C	151.529	-1.50257	0.415826	-3.61345	0.000302152	0.00976316	218.038	229.937	63.8669	94.2757
107	BraA09g060970.3C	895.682	-1.50105	0.336759	-4.45734	8.29844e-06	0.000488137	990.459	1657.13	462.804	472.331
108	BraA09g001460.3C	5346.91	-1.49977	0.390845	-3.83724	0.000124423	0.00469432	4970.87	10829.7	2047.44	3539.62
109	BraA01g016680.3C	188.387	-1.49385	0.386994	-3.86014	0.000113324	0.00436466	250.304	305.828	88.8583	108.56
110	BraA04g001140.3C	3663.71	-1.48867	0.372456	-3.99691	6.41757e-05	0.00271849	3487.63	7317.22	1555.95	2294.04
111	BraA05g031490.3C	419.931	-1.47876	0.366505	-4.03477	5.46567e-05	0.00242646	504.518	731.722	174.94	268.543
112	BraA02g000180.3C	5520.88	-1.47064	0.347379	-4.23351	2.30069e-05	0.00118253	5567.3	10660.9	2554.68	3300.6
113	BraA10g021040.3C	184.806	-1.46326	0.401305	-3.64626	0.000266084	0.00876181	243.459	299.032	79.6022	117.13
114	BraA09g059700.3C	375.308	-1.46161	0.34536	-4.23213	2.31493e-05	0.00118253	570.027	531.235	164.758	235.213
115	BraA09g058520.3C	843.597	-1.46104	0.374036	-3.90616	9.37733e-05	0.00368851	796.865	1678.66	465.581	433.287
116	BraA09g042420.3C	2015.37	-1.4599	0.32064	-4.55308	5.28666e-06	0.000326562	3348.79	2563.29	855.261	1294.15
117	BraA08g032440.3C	1260.51	-1.45772	0.33987	-4.28904	1.79444e-05	0.000955633	1340.49	2356.01	629.413	716.114
118	BraA10g013980.3C	185.296	-1.45483	0.391407	-3.71692	0.000201664	0.0069593	311.902	231.07	94.412	103.798
119	BraA05g037360.3C	4317.37	-1.44718	0.360348	-4.01607	5.91763e-05	0.00255693	3998.99	8636.81	2251.08	2382.6
120	BraA10g021050.3C	452.014	-1.4454	0.333308	-4.33653	1.4475e-05	0.000792055	588.604	733.987	271.203	214.263
121	BraA08g021970.3C	1177.18	-1.4413	0.318534	-4.52479	6.04559e-06	0.000364736	1462.71	1978.82	538.704	728.494
122	BraA10g023420.3C	199.535	-1.43865	0.377127	-3.81477	0.000136312	0.00506901	316.79	266.184	100.891	114.274
123	BraA10g002000.3C	339.765	-1.43788	0.377112	-3.81289	0.000137354	0.0050931	411.632	581.073	141.618	224.738
124	BraA09g033410.3C	282.498	-1.43464	0.385461	-3.72188	0.000197744	0.0068698	341.234	483.661	119.403	185.694
125	BraA09g006980.3C	1143.15	-1.41764	0.372804	-3.80264	0.000143161	0.0052782	1462.71	1864.42	400.788	844.672
126	BraA08g012130.3C	6046.98	-1.41755	0.349416	-4.05691	4.97272e-05	0.00226592	6247.81	11351.9	2664.82	3923.39
127	BraA08g011460.3C	383.471	-1.41717	0.359451	-3.94259	8.06049e-05	0.00324956	685.402	430.425	198.08	219.977
128	BraA02g013280.3C	207.624	-1.4075	0.369072	-3.81361	0.000136949	0.00508539	304.08	299.032	106.445	120.939
129	BraA03g056990.3C	747.486	-1.40515	0.330439	-4.25238	2.11506e-05	0.00110145	913.217	1257.29	347.103	472.331
130	BraA03g045520.3C	291.462	-1.40262	0.366595	-3.82609	0.000130196	0.00487662	365.678	480.263	134.213	185.694
131	BraA01g025080.3C	1335.73	-1.40205	0.309274	-4.53336	5.80533e-06	0.000351882	1642.62	2233.68	657.181	809.437
132	BraA09g065610.3C	3422.24	-1.39738	0.316428	-4.41608	1.00505e-05	0.000571706	4160.32	5762.03	1541.14	2225.48
133	BraA08g028350.3C	1046.91	-1.3942	0.340504	-4.09451	4.23067e-05	0.00198366	1335.6	1697.91	431.333	722.78
134	BraA08g009150.3C	704.027	-1.3865	0.303858	-4.56298	5.04331e-06	0.000315292	998.281	1038.68	357.284	421.86
135	BraA08g006550.3C	293.268	-1.38487	0.367678	-3.76653	0.000165531	0.00590933	394.033	454.211	128.659	196.17
136	BraA01g001110.3C	1567.86	-1.38482	0.2983	-4.64237	3.44436e-06	0.000225118	2233.18	2301.64	738.635	997.989
137	BraA10g012120.3C	483.136	-1.37961	0.324253	-4.25472	2.09307e-05	0.0010944	617.937	778.162	253.616	282.827
138	BraA10g001400.3C	278.836	-1.36467	0.362913	-3.76032	0.000169695	0.00603304	333.412	470.069	149.023	162.84
139	BraA01g002420.3C	4957.04	-1.35515	0.368499	-3.67747	0.000235558	0.00793844	5048.11	9207.69	2028.93	3543.43
140	BraA05g007520.3C	476.113	-1.35317	0.347986	-3.88857	0.000100838	0.00393057	612.07	756.641	211.964	323.775
141	BraA04g000270.3C	1618.81	-1.34248	0.333571	-4.02458	5.70777e-05	0.00247451	2016.12	2627.86	692.354	1138.93
142	BraA06g038810.3C	842.732	-1.34147	0.362229	-3.70338	0.000212744	0.00730356	986.548	1430.6	344.326	609.459
143	BraA05g007450.3C	629.977	-1.33933	0.314613	-4.25707	2.07126e-05	0.00108519	1011.97	794.02	340.624	373.293
144	BraA07g029080.3C	825.575	-1.33916	0.299179	-4.47612	7.60112e-06	0.000450188	1275.96	1090.79	481.316	454.237
145	BraA07g039550.3C	2464.89	-1.3364	0.321343	-4.15881	3.19915e-05	0.00156819	2720.1	4342.76	1260.68	1536.03
146	BraA02g022330.3C	2431.57	-1.33175	0.358118	-3.71876	0.000200201	0.00692727	2304.55	4656.51	1229.21	1536.03
147	BraA01g038640.3C	2244.81	-1.32996	0.359436	-3.70013	0.000215489	0.00736762	2204.82	4219.29	1051.49	1503.65
148	BraA06g042970.3C	6228.45	-1.32821	0.356547	-3.7252	0.000195163	0.00679841	5778.49	12039.4	3222.97	3872.92
149	BraA02g016320.3C	441.722	-1.32783	0.351388	-3.77881	0.000157577	0.00568817	726.467	536.898	206.41	297.111
150	BraA03g056260.3C	309.646	-1.3217	0.364735	-3.62374	0.000290376	0.00945348	472.252	412.301	139.767	214.263
151	BraA10g028200.3C	740.027	-1.31903	0.319463	-4.12891	3.64488e-05	0.00176001	1054.01	1059.07	348.028	498.994
152	BraA06g032410.3C	594.539	-1.30568	0.327103	-3.99166	6.56133e-05	0.00276131	902.462	790.622	284.161	400.91
153	BraA04g009110.3C	8746.27	-1.30313	0.329776	-3.95158	7.76369e-05	0.00317062	9523.27	15373	4149.5	5939.37
154	BraA09g022390.3C	1414.62	-1.30212	0.317585	-4.10008	4.13007e-05	0.00195412	1605.46	2420.57	751.593	880.858
155	BraA03g054840.3C	648.211	-1.29194	0.301151	-4.28999	1.78682e-05	0.000953535	905.395	935.607	379.499	372.341
156	BraA07g017380.3C	7286.69	-1.28812	0.341077	-3.77664	0.000158959	0.00571414	7586.35	13092.8	3440.48	5027.08
157	BraA02g039880.3C	924.669	-1.28487	0.327297	-3.92571	8.64751e-05	0.00344861	1206.54	1415.87	423.003	653.264
158	BraA08g031370.3C	1037.87	-1.28377	0.349944	-3.66851	0.000243972	0.00814879	1192.85	1750.02	457.25	751.348
159	BraA03g064230.3C	1684.22	-1.2821	0.349488	-3.66852	0.000243962	0.00814879	2125.62	2648.24	681.247	1281.77
160	BraA03g005840.3C	2342.38	-1.27436	0.316568	-4.02554	5.68442e-05	0.00247451	2561.7	4067.51	1301.4	1438.89
161	BraA07g033260.3C	718.287	-1.26456	0.310542	-4.07211	4.6589e-05	0.00214558	1057.92	970.721	369.317	475.187
162	BraA07g010120.3C	2513	-1.26378	0.313951	-4.02542	5.68742e-05	0.00247451	2849.16	4247.61	1310.66	1644.59
163	BraA08g022830.3C	5662.43	-1.26328	0.349253	-3.6171	0.000297927	0.00967495	6806.11	9182.77	2291.8	4369.06
164	BraA09g033090.3C	4823.77	-1.26254	0.309963	-4.0732	4.63723e-05	0.00214558	5565.34	8053.47	2454.71	3221.56
165	BraA08g021770.3C	1646.91	-1.26239	0.299986	-4.20817	2.57443e-05	0.00128632	2267.4	2382.06	815.46	1122.74
166	BraA04g009980.3C	735.901	-1.25779	0.327443	-3.84125	0.00012241	0.00463868	1198.72	876.707	373.945	494.233
167	BraA08g024150.3C	6403.51	-1.24797	0.296037	-4.21558	2.4914e-05	0.00125697	9784.33	8240.36	3183.16	4406.2
168	BraA06g000430.3C	2041.76	-1.24403	0.320603	-3.88026	0.000104344	0.00404892	2230.24	3512.49	1097.77	1326.53
169	BraA01g021360.3C	1275.17	-1.24308	0.308867	-4.02464	5.70622e-05	0.00247451	1494.98	2090.96	705.313	809.437
170	BraA09g024970.3C	5872.39	-1.23935	0.2981	-4.1575	3.21743e-05	0.00157417	7773.1	8727.42	2866.61	4122.42
171	BraA09g063780.3C	5084.01	-1.23556	0.305319	-4.04678	5.19268e-05	0.00232521	6104.08	8170.14	2558.38	3503.44
172	BraA10g015100.3C	1462.21	-1.23387	0.289784	-4.25789	2.06362e-05	0.00108338	2200.91	1902.93	810.832	934.186
173	BraA05g012870.3C	338.12	-1.23264	0.330726	-3.72707	0.00019372	0.006761	467.364	481.396	199.931	203.788
174	BraA08g027980.3C	901.219	-1.22998	0.314878	-3.9062	9.37596e-05	0.00368851	1198.72	1328.65	446.143	631.361
175	BraA04g009080.3C	346.395	-1.22804	0.336344	-3.65114	0.000261077	0.00862989	498.652	472.334	186.047	228.547
176	BraA06g041070.3C	410.619	-1.22155	0.320962	-3.8059	0.00014129	0.00521664	594.471	555.021	241.584	251.402
177	BraA03g026180.3C	745.044	-1.22083	0.301797	-4.04519	5.22804e-05	0.00233297	1099.97	985.446	475.762	419.003
178	BraA03g010640.3C	737.554	-1.21876	0.308502	-3.95058	7.79634e-05	0.00317272	915.172	1148.55	465.581	420.907
179	BraA04g009580.3C	1966.85	-1.21739	0.280814	-4.33522	1.45614e-05	0.000795102	2709.34	2792.1	1106.1	1259.87
180	BraA05g016110.3C	6164.75	-1.21495	0.290663	-4.17992	2.91616e-05	0.00143717	7629.37	9605.26	3290.53	4133.84
181	BraA04g014860.3C	27149.7	-1.21289	0.320308	-3.78663	0.000152704	0.00555877	31386.7	44482.1	12949.2	19780.7
182	BraA08g005880.3C	2718.49	-1.21117	0.31261	-3.87439	0.000106892	0.0041416	3027.11	4567.03	1481.9	1797.9
183	BraA03g043700.3C	2133.66	-1.20553	0.302778	-3.98157	6.84608e-05	0.00284872	3111.19	2841.93	1061.67	1519.84
184	BraA10g006830.3C	3471.44	-1.2001	0.282256	-4.25182	2.12036e-05	0.00110199	4435.07	5239.85	1953.96	2256.9
185	BraA05g026060.3C	1976.83	-1.19884	0.299287	-4.00566	6.18433e-05	0.00264566	2682.94	2824.94	1002.43	1396.99
186	BraA08g007230.3C	5377.53	-1.18661	0.320758	-3.6994	0.000216109	0.00737907	5854.76	9089.89	2793.48	3771.98
187	BraA08g011820.3C	792.635	-1.18046	0.31998	-3.68916	0.000224999	0.00766241	905.395	1294.67	459.101	511.374
188	BraA06g019540.3C	10975.9	-1.17821	0.289968	-4.06323	4.83979e-05	0.00222442	12855.4	17593	6370.96	7084.01
189	BraA10g013610.3C	990.89	-1.17574	0.295566	-3.97792	6.95201e-05	0.00287891	1311.16	1436.26	559.067	657.073
190	BraA09g042870.3C	8706.23	-1.17477	0.289263	-4.06126	4.88089e-05	0.00223193	13445	10689.3	4746.51	5944.13
191	BraA07g016040.3C	1772.29	-1.16575	0.296341	-3.93381	8.36092e-05	0.003355	2616.45	2286.91	947.822	1237.96
192	BraA10g023340.3C	1030.21	-1.16133	0.306104	-3.7939	0.000148301	0.00543674	1551.69	1295.8	557.216	716.114
193	BraA03g021010.3C	4899.69	-1.1513	0.285846	-4.02769	5.63267e-05	0.00247093	6224.35	7290.03	2700.92	3383.45
194	BraA06g015860.3C	3823.51	-1.13891	0.303183	-3.75651	0.000172298	0.00611716	4547.51	5970.44	2034.49	2741.61
195	BraA09g053780.3C	511.268	-1.13889	0.315168	-3.6136	0.000301973	0.00976316	645.314	761.172	311.004	327.584
196	BraA01g029170.3C	1942.55	-1.13788	0.283559	-4.01285	5.9989e-05	0.00257913	2647.74	2694.68	1108.88	1318.91
197	BraA06g011900.3C	1549.12	-1.12976	0.298057	-3.79043	0.000150385	0.00550531	1917.36	2335.62	863.592	1079.88
198	BraA01g037790.3C	2992.55	-1.11992	0.282638	-3.96238	7.42066e-05	0.00304859	3868.95	4329.16	1715.15	2056.92
199	BraA06g006230.3C	2025.66	-1.10474	0.306231	-3.60753	0.000309128	0.0099143	2394.51	3136.44	1105.18	1466.51
200	BraA09g060510.3C	7205.89	-1.10054	0.300556	-3.66169	0.000250559	0.00831407	8311.84	11345.1	3998.62	5168.02
201	BraA06g009120.3C	813.284	-1.09576	0.298995	-3.66483	0.000247501	0.00824405	1024.68	1191.6	501.679	535.181
202	BraA08g003560.3C	2593.52	-1.07694	0.295389	-3.64582	0.000266537	0.00876559	3378.12	3659.74	1407.85	1928.37
203	BraA03g027230.3C	2481.34	-1.05209	0.280666	-3.74855	0.000177863	0.00628028	3419.19	3276.89	1747.55	1481.75
204	BraA09g062800.3C	2497.87	-1.04392	0.284033	-3.67533	0.000237538	0.00799476	3036.89	3691.46	1564.28	1698.87
205	BraA05g031040.3C	5070.71	-1.02292	0.278851	-3.66836	0.00024411	0.00814879	7492.48	6100.7	3374.76	3314.88
206	BraA07g034440.3C	2005.64	1.053	0.280791	3.75012	0.000176749	0.00624947	1225.12	1384.15	2790.71	2622.58
207	BraA01g000990.3C	3553.47	1.06938	0.272592	3.923	8.74519e-05	0.00347685	2230.24	2357.14	4927.01	4699.5
208	BraA03g007910.3C	2695.84	1.07007	0.296406	3.61014	0.000306027	0.00982704	1718.88	1760.21	4253.17	3051.1
209	BraA03g007270.3C	2053.86	1.08065	0.281266	3.8421	0.000121984	0.0046293	1297.47	1339.98	2989.71	2588.3
210	BraA09g026940.3C	2752.14	1.08083	0.283062	3.81836	0.00013434	0.00501006	1933.01	1600.5	3911.62	3563.43
211	BraA07g038770.3C	1043.73	1.0934	0.30142	3.6275	0.000286181	0.00934278	626.737	705.67	1587.42	1255.1
212	BraA06g040060.3C	1268.21	1.11937	0.303535	3.68779	0.000226209	0.00768338	882.907	715.864	1943.78	1530.31
213	BraA10g018700.3C	4172.2	1.14614	0.301878	3.7967	0.000146634	0.00538323	2778.76	2414.91	6802.29	4692.83
214	BraA09g062540.3C	621.603	1.15102	0.317817	3.62165	0.000292732	0.00951822	351.989	420.23	955.227	758.967
215	BraA09g022980.3C	1001.78	1.15781	0.300056	3.85865	0.000114014	0.00438471	593.493	646.77	1536.51	1230.34
216	BraA08g000960.3C	427.053	1.16462	0.322444	3.61186	0.000304006	0.00981083	263.014	263.918	546.108	635.17
217	BraA02g002350.3C	1772.2	1.17159	0.307751	3.80694	0.000140699	0.00520224	1172.32	1006.97	2889.75	2019.78
218	BraA09g029360.3C	695.833	1.17562	0.307524	3.82286	0.000131915	0.00492673	473.23	380.586	951.524	977.991
219	BraA01g013540.3C	551.435	1.17774	0.321391	3.66451	0.000247812	0.00824405	313.857	362.463	857.112	672.309
220	BraA01g030520.3C	833.516	1.17781	0.294237	4.00294	6.25613e-05	0.00266756	520.162	501.784	1190.33	1121.79
221	BraA10g032770.3C	433.56	1.19138	0.324326	3.6734	0.000239344	0.00802927	247.37	280.909	647.925	558.036
222	BraA02g015830.3C	2228.59	1.1915	0.311487	3.82519	0.000130673	0.00488742	1527.24	1187.07	3644.12	2555.92
223	BraA09g065370.3C	1653.39	1.20078	0.283739	4.23198	2.31645e-05	0.00118253	985.57	1019.43	2462.12	2146.44
224	BraA10g002140.3C	535.932	1.20867	0.331572	3.64527	0.00026711	0.00877328	324.612	322.818	883.029	613.268
225	BraA09g025760.3C	1289.48	1.21686	0.31305	3.8871	0.000101448	0.0039484	919.083	632.044	1931.74	1675.06
226	BraA08g028330.3C	790.752	1.21925	0.29911	4.07626	4.57651e-05	0.00212275	508.429	441.752	1132.94	1079.88
227	BraA10g013040.3C	464.804	1.21933	0.337426	3.61361	0.000301958	0.00976316	292.347	266.184	764.552	536.133
228	BraA01g003630.3C	397.138	1.22533	0.323833	3.78382	0.000154437	0.00561395	234.66	241.264	582.207	530.42
229	BraA06g015440.3C	440.681	1.22658	0.329438	3.72325	0.000196677	0.00684191	264.97	262.786	698.834	536.133
230	BraA01g003740.3C	1634.63	1.23423	0.299274	4.12408	3.72212e-05	0.00179063	1053.03	897.095	2600.03	1988.36
231	BraA08g029780.3C	7700.42	1.23443	0.301879	4.08914	4.32975e-05	0.00202645	4076.23	5110.73	12660.5	8954.28
232	BraA05g032080.3C	1113.64	1.24295	0.29529	4.20925	2.56221e-05	0.00128269	671.713	651.3	1406	1725.53
233	BraA03g010460.3C	1732.62	1.24837	0.295585	4.2234	2.40648e-05	0.00121888	1098.01	954.863	2741.65	2135.96
234	BraA06g028610.3C	331.142	1.24975	0.345764	3.61447	0.000300964	0.00976133	214.127	177.833	517.415	415.194
235	BraA01g019000.3C	4893.24	1.25038	0.291989	4.28227	1.84995e-05	0.000981158	3032	2760.38	7959.3	5821.28
236	BraA01g033880.3C	1607.22	1.25585	0.302438	4.15243	3.28966e-05	0.00160647	854.552	1043.21	2572.26	1958.84
237	BraA02g014190.3C	816.269	1.25783	0.320622	3.92308	8.74232e-05	0.00347685	397.944	565.215	1246.79	1055.13
238	BraA02g031510.3C	742.471	1.25785	0.332976	3.7776	0.000158346	0.00570002	493.763	381.719	1244.02	850.385
239	BraA07g020420.3C	1098.94	1.25991	0.318875	3.95111	7.77892e-05	0.00317062	525.051	770.233	1690.16	1410.33
240	BraA10g005490.3C	541.135	1.27519	0.316892	4.02406	5.72037e-05	0.00247583	308.968	323.951	846.931	684.689
241	BraA01g014910.3C	774.853	1.27807	0.33499	3.81525	0.000136046	0.00506639	421.409	483.661	1344.91	849.433
242	BraAnng003630.3C	1317.84	1.28187	0.311018	4.12154	3.76352e-05	0.00180384	850.641	685.281	2160.37	1575.07
243	BraA06g044820.3C	268.045	1.28888	0.356919	3.61112	0.000304874	0.00982658	150.573	160.843	334.144	426.621
244	BraA03g002960.3C	1444.69	1.29217	0.289959	4.45638	8.33542e-06	0.0004892	827.175	848.389	2252.93	1850.28
245	BraA03g004550.3C	1478.6	1.30018	0.326592	3.98106	6.86074e-05	0.00285024	683.446	1025.09	2424.17	1781.71
246	BraA05g031720.3C	752.386	1.30252	0.343932	3.78714	0.000152394	0.00555877	483.985	383.984	1325.47	816.103
247	BraA07g042640.3C	1101.15	1.30402	0.311853	4.18151	2.89583e-05	0.00143308	695.179	574.277	1808.64	1326.53
248	BraA01g020860.3C	813.151	1.30859	0.294266	4.44695	8.7098e-06	0.000507718	465.408	470.069	1148.68	1168.45
249	BraA03g013000.3C	1707.15	1.31556	0.357188	3.68309	0.000230424	0.00779586	871.174	1086.26	3229.44	1641.73
250	BraA09g041490.3C	474.763	1.31572	0.326913	4.02469	5.70493e-05	0.00247451	245.415	299.032	611.827	742.778
251	BraA09g045510.3C	385.762	1.31719	0.33082	3.9816	6.84525e-05	0.00284872	205.327	236.733	589.612	511.374
252	BraA03g009470.3C	1043.44	1.33132	0.355643	3.74341	0.000181541	0.00639272	608.159	578.808	1966.92	1019.89
253	BraA08g027790.3C	447.74	1.33166	0.323412	4.11755	3.82928e-05	0.00182859	245.415	263.918	698.834	582.795
254	BraA07g030660.3C	547.674	1.33375	0.334706	3.98483	6.75283e-05	0.0028281	252.259	370.392	838.6	729.446
255	BraA10g019360.3C	1264.87	1.3393	0.333716	4.01329	5.98792e-05	0.00257869	617.937	815.541	2224.23	1401.76
256	BraA09g038270.3C	602.34	1.34445	0.348131	3.86191	0.000112505	0.00434605	357.856	322.818	1080.18	648.502
257	BraA04g017140.3C	1279.1	1.35062	0.338266	3.99278	6.53023e-05	0.0027527	523.095	918.617	1954.88	1719.82
258	BraA01g007490.3C	896.53	1.3551	0.320158	4.23261	2.30999e-05	0.00118253	501.585	506.315	1539.29	1038.94
259	BraA05g032430.3C	1680.69	1.35921	0.298213	4.55785	5.16788e-06	0.000321527	1004.15	881.238	2749.98	2087.4
260	BraA09g020370.3C	431.885	1.36166	0.367438	3.70581	0.000210713	0.00725221	174.039	310.359	580.356	662.786
261	BraA06g002370.3C	750.623	1.36765	0.324465	4.2151	2.49665e-05	0.00125717	500.607	337.543	1130.17	1034.18
262	BraA02g005100.3C	313.52	1.36964	0.338718	4.04361	5.26336e-05	0.00234469	164.262	185.762	450.771	453.285
263	BraA09g000160.3C	1829.19	1.3719	0.29184	4.70086	2.59071e-06	0.000175991	1034.46	1004.7	2971.2	2306.42
264	BraA02g041320.3C	1247.26	1.37668	0.319352	4.31086	1.62621e-05	0.000876868	652.158	735.12	2173.33	1428.42
265	BraA07g014550.3C	345.794	1.37835	0.355848	3.87341	0.000107322	0.00415201	206.305	177.833	591.463	407.576
266	BraA02g018930.3C	901.774	1.38392	0.372468	3.71555	0.000202762	0.00698788	498.652	500.652	1768.84	838.958
267	BraA01g034810.3C	3107.03	1.39037	0.274448	5.06608	4.06085e-07	3.22402e-05	1767.77	1663.93	4652.1	4344.3
268	BraA01g014620.3C	634.03	1.391	0.385287	3.61029	0.000305859	0.00982704	371.544	328.482	1252.35	583.747
269	BraA08g022000.3C	659.192	1.39182	0.3043	4.57386	4.78823e-06	0.000300798	347.101	380.586	999.656	909.427
270	BraA08g020660.3C	2386.46	1.39186	0.327262	4.25303	2.10893e-05	0.00110047	1644.57	988.844	3807.02	3105.38
271	BraA07g036830.3C	1247.34	1.39631	0.3446	4.05198	5.07868e-05	0.00228206	790.021	583.339	2273.29	1342.71
272	BraA04g031970.3C	364.696	1.39785	0.356917	3.91647	8.98546e-05	0.00356143	175.017	226.539	621.083	436.144
273	BraA02g022730.3C	1638.88	1.40555	0.291569	4.82063	1.43103e-06	0.000100921	915.172	881.238	2656.49	2102.63
274	BraA03g060860.3C	355.787	1.40779	0.372666	3.77761	0.000158338	0.00570002	185.772	203.885	651.628	381.864
275	BraA09g038140.3C	807.504	1.41106	0.357731	3.94446	7.99803e-05	0.00322941	323.635	559.552	1373.6	973.229
276	BraA07g036430.3C	2638.82	1.41184	0.328633	4.29611	1.7382e-05	0.000931431	1453.91	1429.46	4878.88	2793.04
277	BraA02g020000.3C	627.432	1.41565	0.362838	3.90159	9.55641e-05	0.00373624	445.853	237.866	842.303	983.705
278	BraA10g032500.3C	635.809	1.41603	0.387774	3.65169	0.000260525	0.00862263	268.881	424.761	1213.47	636.123
279	BraA04g014020.3C	429.74	1.42156	0.341592	4.16158	3.16047e-05	0.00155217	209.238	258.255	721.048	530.42
280	BraA05g008520.3C	199.431	1.42172	0.385436	3.68861	0.000225479	0.00766866	103.641	113.27	333.219	247.593
281	BraA09g056530.3C	613.816	1.42186	0.346401	4.10468	4.04876e-05	0.00192275	416.521	250.326	957.078	831.34
282	BraA06g013100.3C	11650	1.42224	0.328326	4.33179	1.47901e-05	0.000805888	5168.38	7495.05	20815.1	13121.5
283	BraA03g029050.3C	652.007	1.42524	0.361069	3.94727	7.90469e-05	0.00320673	374.478	333.013	668.289	1232.25
284	BraA03g012590.3C	265.577	1.43344	0.367146	3.90429	9.45022e-05	0.0037093	124.174	163.108	434.11	340.916
285	BraA06g000220.3C	339.355	1.4377	0.356479	4.03306	5.50561e-05	0.00243583	192.616	173.303	588.686	402.814
286	BraA07g017660.3C	332.257	1.44094	0.363877	3.95998	7.49571e-05	0.00306968	218.038	139.322	450.771	520.897
287	BraA10g022970.3C	644.788	1.44509	0.392137	3.68517	0.000228554	0.00775047	426.298	266.184	1248.64	638.027
288	BraA09g055950.3C	1257.54	1.45692	0.31029	4.69536	2.66141e-06	0.000180159	629.67	713.599	2159.44	1527.46
289	BraA07g021000.3C	10176.3	1.46554	0.303608	4.82708	1.38552e-06	9.82469e-05	4755.77	6065.59	17573.6	12310.1
290	BraA02g027610.3C	1126.82	1.47038	0.32367	4.54284	5.55002e-06	0.000338787	686.379	508.581	1939.15	1373.19
291	BraA04g014630.3C	1181.17	1.47363	0.381664	3.86108	0.000112889	0.00435437	662.913	587.869	2413.06	1060.84
292	BraA05g036610.3C	745.534	1.47663	0.316122	4.67107	2.99631e-06	0.000198847	415.543	372.657	1259.75	934.186
293	BraA07g019900.3C	187.376	1.47769	0.394999	3.74099	0.000183298	0.00643707	117.33	80.4214	284.161	267.59
294	BraA03g056960.3C	1068.65	1.48071	0.325694	4.54633	5.45891e-06	0.000334804	553.406	574.277	1928.97	1217.97
295	BraA01g041020.3C	1223.94	1.48506	0.362423	4.09759	4.17466e-05	0.00196116	689.313	599.196	2412.13	1195.11
296	BraA03g011630.3C	360.618	1.48604	0.36222	4.10259	4.08553e-05	0.00193666	200.438	178.966	649.776	413.289
297	BraA05g015310.3C	683.676	1.48742	0.402233	3.69792	0.000217377	0.00741259	454.653	263.918	1349.54	666.596
298	BraA04g024790.3C	999.432	1.48824	0.369175	4.03125	5.54799e-05	0.00244206	503.54	547.092	1990.06	957.041
299	BraA03g059440.3C	452.241	1.48832	0.373583	3.98391	6.77911e-05	0.00282995	208.26	267.316	852.484	480.901
300	BraA01g044050.3C	1068.65	1.49353	0.314578	4.74774	2.05707e-06	0.000141976	615.981	504.05	1829	1325.57
301	BraA05g026160.3C	369.933	1.50287	0.362723	4.1433	3.42345e-05	0.00166552	240.526	144.985	559.992	534.229
302	BraA02g025470.3C	545.82	1.52078	0.383743	3.96302	7.40084e-05	0.00304778	344.167	219.743	1040.38	578.986
303	BraA04g020130.3C	556.007	1.52082	0.352317	4.31661	1.58443e-05	0.000861516	222.927	352.269	943.194	705.639
304	BraA10g027020.3C	538.82	1.52166	0.375175	4.05587	4.99475e-05	0.00227195	185.772	371.524	758.072	839.91
305	BraA05g008530.3C	200.753	1.5259	0.403482	3.78183	0.000155677	0.0056511	101.686	105.341	368.392	227.595
306	BraA05g015980.3C	223.991	1.52591	0.39549	3.85828	0.000114187	0.00438485	107.552	123.464	255.468	409.48
307	BraA06g019600.3C	565.278	1.52952	0.361411	4.23209	2.31532e-05	0.00118253	273.77	308.093	1077.41	601.841
308	BraA10g029700.3C	255.054	1.53033	0.377552	4.0533	5.05007e-05	0.00228108	154.484	107.606	425.779	332.345
309	BraA07g034020.3C	161.813	1.53107	0.405483	3.77591	0.000159423	0.00571495	94.8416	71.3599	259.17	221.881
310	BraA09g036900.3C	555.45	1.53193	0.363637	4.21279	2.52237e-05	0.0012674	248.348	322.818	1045.94	604.697
311	BraA01g015000.3C	334.207	1.53533	0.398812	3.84977	0.00011823	0.00452665	211.194	131.393	625.711	368.532
312	BraA06g027760.3C	1055.66	1.53636	0.301545	5.09497	3.4879e-07	2.82105e-05	537.762	544.827	1771.61	1368.43
313	BraA02g015080.3C	263.188	1.54066	0.350524	4.3953	1.1062e-05	0.000617041	137.863	131.393	404.49	379.007
314	BraA02g020760.3C	2146.69	1.54143	0.352055	4.37838	1.19564e-05	0.000664066	996.325	1199.53	4224.47	2166.44
315	BraA07g022130.3C	651.669	1.54187	0.357943	4.3076	1.65038e-05	0.000888046	266.925	399.842	1185.7	754.205
316	BraA05g001270.3C	1287.71	1.55167	0.314611	4.93204	8.13741e-07	6.0175e-05	535.806	774.764	2091.87	1748.38
317	BraA09g051160.3C	2641.19	1.55377	0.27977	5.55375	2.79607e-08	2.99041e-06	1330.72	1353.57	4250.39	3630.09
318	BraA08g033380.3C	333.903	1.55609	0.405299	3.83936	0.000123355	0.00466599	184.794	154.047	670.14	326.632
319	BraA03g000240.3C	329.352	1.56721	0.392207	3.99588	6.44533e-05	0.00272578	137.863	194.824	625.711	359.009
320	BraA10g014240.3C	1722.66	1.57268	0.321261	4.89532	9.81436e-07	7.15536e-05	744.066	989.976	3073.02	2083.59
321	BraA03g055790.3C	5265.09	1.57557	0.342562	4.59939	4.23727e-06	0.000268796	1947.67	3343.72	9412.5	6356.46
322	BraA03g047450.3C	8234.14	1.57774	0.348012	4.53359	5.79905e-06	0.000351882	2720.1	5545.68	12356.9	12313.9
323	BraA09g059070.3C	965.393	1.58475	0.345686	4.58436	4.55386e-06	0.000286771	453.675	511.979	1849.36	1046.55
324	BraA07g004020.3C	239.487	1.58538	0.40001	3.96335	7.39055e-05	0.00304778	141.773	97.4119	436.887	281.875
325	BraA09g064150.3C	302.681	1.58798	0.341672	4.64768	3.35695e-06	0.000219961	143.729	158.577	464.655	443.762
326	BraA03g016260.3C	3452.32	1.59233	0.296247	5.375	7.65815e-08	7.36834e-06	1778.52	1660.53	6050.7	4319.54
327	BraA01g018200.3C	7705.44	1.60136	0.293338	5.45909	4.78588e-08	4.8386e-06	4276.67	3362.97	13059.4	10122.7
328	BraA05g014510.3C	500.226	1.6024	0.364225	4.39948	1.08511e-05	0.000609213	200.438	295.634	917.277	587.556
329	BraA09g005890.3C	509.447	1.60487	0.317706	5.05143	4.38525e-07	3.46034e-05	271.814	232.203	805.278	728.494
330	BraA05g000260.3C	3159.74	1.61598	0.28243	5.72173	1.05447e-08	1.24053e-06	1436.31	1672.99	5114.91	4414.77
331	BraA03g033670.3C	489.335	1.61604	0.36128	4.47311	7.70897e-06	0.000455533	264.97	216.345	925.607	550.417
332	BraA01g011610.3C	2760.77	1.61612	0.35495	4.55309	5.28648e-06	0.000326562	989.481	1727.36	5106.58	3219.66
333	BraA01g002570.3C	1630.57	1.6181	0.372909	4.33913	1.43045e-05	0.000784386	583.716	1019.43	3150.77	1768.38
334	BraA06g041150.3C	409.187	1.62031	0.402345	4.02717	5.64516e-05	0.00247222	277.681	123.464	577.579	658.025
335	BraA03g039530.3C	253.825	1.62652	0.41549	3.91471	9.05132e-05	0.00358205	157.417	90.6157	472.06	295.207
336	BraA03g012070.3C	3637.02	1.62727	0.311283	5.22761	1.71712e-07	1.51681e-05	1910.52	1646.94	6663.45	4327.16
337	BraA10g027380.3C	163.32	1.62856	0.416574	3.9094	9.25253e-05	0.00365052	94.8416	64.5637	276.757	217.12
338	BraA06g040610.3C	254.093	1.62908	0.385443	4.22652	2.37338e-05	0.00120684	150.573	97.4119	433.184	335.202
339	BraA10g012580.3C	492.655	1.63057	0.358755	4.54509	5.49131e-06	0.000335995	215.105	266.184	926.533	562.797
340	BraA08g016160.3C	236.792	1.63157	0.42499	3.83909	0.000123491	0.00466599	144.707	86.0849	453.548	262.829
341	BraA07g004830.3C	1358.05	1.63276	0.3887	4.20058	2.66238e-05	0.0013226	872.151	451.946	2645.39	1462.7
342	BraA06g006990.3C	272.383	1.63954	0.41689	3.93279	8.39643e-05	0.00335883	145.684	118.933	553.513	271.4
343	BraA10g012720.3C	132.359	1.64039	0.439593	3.7316	0.000190267	0.00665473	76.2644	52.104	225.848	175.219
344	BraA02g045280.3C	555.987	1.64089	0.36055	4.55107	5.3373e-06	0.000328905	191.639	348.87	799.725	883.715
345	BraA10g005670.3C	339.098	1.641	0.372767	4.4022	1.07156e-05	0.000602917	166.217	163.108	643.297	383.769
346	BraA09g022670.3C	127.213	1.64173	0.428327	3.83289	0.000126649	0.00476442	64.5314	58.9002	174.014	211.406
347	BraA06g040090.3C	447.568	1.66084	0.361943	4.58868	4.46048e-06	0.000282265	163.284	267.316	766.403	593.27
348	BraA07g001030.3C	507.407	1.66676	0.355388	4.68997	2.73242e-06	0.000182717	263.992	222.008	958.929	584.7
349	BraA05g014830.3C	275.584	1.67031	0.427837	3.90407	9.45883e-05	0.0037093	161.328	101.943	558.141	280.922
350	BraA07g000180.3C	245.889	1.67064	0.416188	4.01414	5.96636e-05	0.00257369	117.33	117.8	497.977	250.449
351	BraA04g025990.3C	3136.98	1.67104	0.348425	4.79599	1.61873e-06	0.000113539	1130.28	1868.95	5875.76	3672.94
352	BraA05g034710.3C	700.389	1.67425	0.312699	5.35419	8.59424e-08	8.05928e-06	290.391	378.321	1099.62	1033.22
353	BraA04g026210.3C	474.735	1.67594	0.351799	4.76392	1.89872e-06	0.00013175	201.416	251.459	874.699	571.368
354	BraA03g022700.3C	163.805	1.67695	0.450914	3.71901	0.000200006	0.00692727	95.8193	60.0329	317.483	181.885
355	BraA01g042810.3C	188.521	1.68081	0.400688	4.1948	2.73109e-05	0.00135414	90.9306	88.3503	343.4	231.404
356	BraA03g042140.3C	319.149	1.68168	0.447753	3.75583	0.00017277	0.00612552	188.705	114.402	684.949	288.541
357	BraA02g034590.3C	120.712	1.68504	0.452126	3.72693	0.000193828	0.006761	47.9097	66.8291	212.89	155.222
358	BraA07g031340.3C	531.573	1.69124	0.420132	4.02548	5.68588e-05	0.00247451	228.793	274.112	1165.34	458.046
359	BraA06g012710.3C	2678.94	1.69223	0.301113	5.61992	1.91041e-08	2.1498e-06	1158.63	1373.96	4751.14	3432.01
360	BraA10g007880.3C	206.934	1.69743	0.403476	4.20703	2.58754e-05	0.0012879	122.219	72.4926	338.772	294.254
361	BraA06g007900.3C	375.825	1.69792	0.401902	4.2247	2.39255e-05	0.00121419	128.085	226.539	719.197	429.478
362	BraA01g031100.3C	103.594	1.69998	0.465241	3.65397	0.000258212	0.00855703	57.6871	39.6444	167.535	149.508
363	BraA05g040740.3C	823.652	1.70367	0.383803	4.43892	9.04105e-06	0.000522323	442.92	330.747	1709.6	811.342
364	BraA03g006630.3C	3250.52	1.70505	0.339989	5.015	5.3033e-07	4.12192e-05	1894.88	1156.48	5969.24	3981.48
365	BraA03g006200.3C	178.374	1.70642	0.426082	4.00492	6.20372e-05	0.00264958	95.8193	71.3599	340.624	205.692
366	BraA01g018010.3C	220.579	1.70734	0.377818	4.51896	6.21452e-06	0.000373188	102.664	104.208	386.904	288.541
367	BraA04g001380.3C	361.644	1.70758	0.377635	4.52178	6.13225e-06	0.000369104	153.506	185.762	700.685	406.623
368	BraA04g029030.3C	684.342	1.70923	0.323234	5.2879	1.23728e-07	1.11192e-05	299.191	342.074	1218.1	878.002
369	BraA10g031270.3C	1260.96	1.71102	0.314539	5.43979	5.33443e-08	5.33072e-06	571.983	608.258	2306.61	1556.98
370	BraA07g040570.3C	16803	1.71628	0.290994	5.89798	3.67979e-09	4.73833e-07	7983.31	7698.94	30132.2	21397.7
371	BraA09g046640.3C	251.492	1.72417	0.439721	3.92106	8.81619e-05	0.0034997	103.641	130.26	536.852	235.213
372	BraA05g025990.3C	207.572	1.7243	0.473481	3.64175	0.000270786	0.00888276	51.8207	141.587	370.243	266.638
373	BraA09g058700.3C	498.744	1.72664	0.331682	5.20572	1.93241e-07	1.67835e-05	200.438	262.786	842.303	689.45
374	BraA06g003170.3C	362.35	1.72783	0.424307	4.07213	4.65853e-05	0.00214558	135.907	200.487	767.329	345.677
375	BraA06g019720.3C	268.638	1.7332	0.450039	3.85122	0.000117533	0.00450665	156.44	91.7484	569.249	257.115
376	BraA07g041180.3C	109.565	1.73599	0.47552	3.65071	0.000261518	0.00863343	63.5536	37.379	190.675	146.651
377	BraA01g002700.3C	747.004	1.74599	0.352463	4.95367	7.28257e-07	5.47929e-05	307.013	379.453	1457.83	843.719
378	BraA06g020450.3C	528.629	1.75462	0.414853	4.2295	2.34213e-05	0.00119329	266.925	216.345	1157.01	474.235
379	BraA02g036260.3C	137.127	1.75606	0.469006	3.7442	0.000180967	0.00638117	67.4646	57.7675	281.385	141.89
380	BraA03g049500.3C	196.83	1.76512	0.467624	3.77465	0.000160232	0.00573599	100.708	78.156	431.333	177.124
381	BraA02g022050.3C	92.4352	1.77307	0.472434	3.75306	0.000174691	0.00618516	43.9987	39.6444	150.874	135.224
382	BraA09g004550.3C	663.251	1.7757	0.374392	4.74289	2.10695e-06	0.000145032	400.877	198.222	1129.24	924.663
383	BraA03g042300.3C	160.35	1.78016	0.449215	3.96282	7.4069e-05	0.00304778	49.8652	95.1465	288.79	207.597
384	BraA02g018610.3C	705.987	1.78194	0.350046	5.09058	3.56977e-07	2.86934e-05	353.945	282.041	1368.05	819.912
385	BraA08g035680.3C	382.231	1.79076	0.34214	5.23399	1.65888e-07	1.47543e-05	197.505	144.985	565.546	620.886
386	BraA02g040860.3C	1381.67	1.79104	0.286702	6.24704	4.183e-10	6.68299e-08	659.98	578.808	2123.34	2164.53
387	BraA02g044460.3C	638.605	1.79477	0.315686	5.68529	1.30588e-08	1.51586e-06	281.591	289.97	1116.28	866.574
388	BraA02g026160.3C	1135.01	1.79997	0.335947	5.35791	8.4191e-08	7.92375e-06	534.828	477.998	2214.98	1312.24
389	BraA07g038660.3C	1309.1	1.80238	0.30847	5.84295	5.12836e-09	6.50649e-07	659.002	507.448	2283.47	1786.48
390	BraA07g027750.3C	122.367	1.80343	0.431488	4.17956	2.92075e-05	0.00143717	55.7316	53.2367	179.568	200.931
391	BraA03g015890.3C	120.355	1.80765	0.477198	3.78805	0.000151834	0.00555053	70.3979	36.2463	212.89	161.887
392	BraA02g012200.3C	1735.93	1.81544	0.438671	4.13851	3.49574e-05	0.0016975	1014.9	521.04	3940.31	1467.46
393	BraA08g019420.3C	10184.3	1.81708	0.298562	6.08609	1.15703e-09	1.65448e-07	4937.63	4067.51	18561.2	13171
394	BraA01g004150.3C	202.431	1.81717	0.465653	3.90241	9.5238e-05	0.00372912	92.8861	86.0849	450.771	179.981
395	BraA01g014840.3C	2144.61	1.81755	0.349417	5.20168	1.97495e-07	1.70955e-05	901.484	994.507	4417.92	2264.52
396	BraA01g030980.3C	260.936	1.81775	0.358076	5.07643	3.84593e-07	3.07223e-05	125.152	105.341	429.482	383.769
397	BraA08g024730.3C	644.537	1.82294	0.381595	4.77715	1.77793e-06	0.0001237	244.437	323.951	1339.35	670.405
398	BraA06g020660.3C	1308.81	1.82416	0.376517	4.84482	1.26728e-06	9.06073e-05	703.979	448.548	2699.07	1383.66
399	BraA04g012330.3C	6495.65	1.82461	0.287346	6.34986	2.15506e-10	3.79438e-08	2993.87	2726.4	11543.3	8719.07
400	BraA03g022970.3C	7387.4	1.82859	0.275552	6.6361	3.22099e-11	6.56423e-09	3077.95	3413.95	12387.4	10670.3
401	BraA09g011560.3C	748.248	1.8346	0.355204	5.16494	2.40519e-07	2.02772e-05	242.482	413.434	1348.61	988.466
402	BraA07g015410.3C	218.014	1.83966	0.401268	4.5846	4.54849e-06	0.000286771	115.374	74.7579	393.383	288.541
403	BraA05g022780.3C	531.553	1.84522	0.424248	4.34939	1.36518e-05	0.000751778	305.057	157.445	1120.91	542.799
404	BraA01g044040.3C	2215.5	1.84547	0.338802	5.44705	5.12108e-08	5.13736e-06	1007.08	922.015	4483.64	2449.26
405	BraA03g011450.3C	114.311	1.84616	0.461627	3.99925	6.35445e-05	0.00269616	59.6426	39.6444	201.782	156.174
406	BraA03g027590.3C	323.094	1.84803	0.371683	4.97205	6.62502e-07	5.02841e-05	142.751	138.189	623.859	387.578
407	BraA03g036740.3C	290.68	1.8486	0.360402	5.12928	2.90857e-07	2.38226e-05	104.619	148.383	452.622	457.094
408	BraA04g032140.3C	213.379	1.84873	0.400397	4.61726	3.88844e-06	0.00025035	94.8416	90.6157	411.895	256.163
409	BraA03g047260.3C	138.486	1.84979	0.436414	4.23862	2.24899e-05	0.00115953	71.3756	48.7059	244.36	189.504
410	BraA08g034670.3C	267.199	1.85435	0.415214	4.46601	7.96905e-06	0.000469829	149.595	81.5541	508.158	329.489
411	BraA05g031950.3C	767.675	1.85503	0.41315	4.48997	7.12333e-06	0.000424806	195.55	470.069	1467.09	937.995
412	BraA08g019500.3C	173.343	1.85533	0.424293	4.37277	1.22682e-05	0.000679926	58.6649	91.7484	225.848	317.109
413	BraA06g005960.3C	75.3398	1.86311	0.507917	3.66814	0.000244319	0.00814879	33.2434	31.7155	124.031	112.369
414	BraA03g016050.3C	204.091	1.86818	0.465608	4.01234	6.01197e-05	0.00258046	46.9319	129.127	317.483	322.823
415	BraA10g025540.3C	528.045	1.88253	0.32581	5.77799	7.56001e-09	9.27337e-07	245.415	205.018	924.682	737.064
416	BraA05g009090.3C	1066.98	1.88604	0.314591	5.9952	2.03229e-09	2.71133e-07	373.5	535.765	1785.5	1573.17
417	BraA03g001630.3C	141.854	1.88883	0.459225	4.1131	3.90387e-05	0.00186077	60.6204	60.0329	292.492	154.269
418	BraA08g016780.3C	295.423	1.89143	0.466759	4.05226	5.0725e-05	0.00228206	87.0196	164.241	659.032	271.4
419	BraA06g040100.3C	180.653	1.89357	0.43888	4.31456	1.59923e-05	0.000867742	68.4424	84.9522	372.094	197.122
420	BraA05g038320.3C	248.345	1.89402	0.386238	4.90376	9.40176e-07	6.87391e-05	84.0863	126.862	441.515	340.916
421	BraA06g032530.3C	114.228	1.8962	0.482727	3.9281	8.56208e-05	0.00341981	46.9319	49.8386	125.883	234.261
422	BraA06g044080.3C	1711.5	1.89624	0.353614	5.36246	8.20965e-08	7.77106e-06	868.24	581.073	3432.15	1964.55
423	BraA05g005770.3C	332.522	1.89758	0.470794	4.03059	5.5636e-05	0.00244477	101.686	180.099	765.477	282.827
424	BraA07g003290.3C	703.947	1.90161	0.357047	5.32593	1.00435e-07	9.15306e-06	301.146	293.368	1434.69	786.583
425	BraA03g005650.3C	224.969	1.90429	0.425041	4.48024	7.45595e-06	0.000443621	128.085	61.1656	388.755	321.87
426	BraA04g022070.3C	696.094	1.91354	0.363391	5.26578	1.39595e-07	1.24587e-05	385.233	198.222	1149.6	1051.32
427	BraA03g021380.3C	140.71	1.91583	0.509426	3.76076	0.0001694	0.00603082	32.2657	86.0849	272.129	172.363
428	BraA05g003770.3C	7081.27	1.93054	0.3541	5.45195	4.98203e-08	5.01731e-06	2206.78	3680.13	14158.1	8280.07
429	BraA03g021940.3C	5996.48	1.93062	0.311406	6.19967	5.65815e-10	8.61437e-08	2721.07	2263.13	11535.8	7465.87
430	BraA10g001200.3C	260.004	1.93085	0.373392	5.17112	2.32698e-07	1.9682e-05	92.8861	123.464	464.655	359.009
431	BraA10g000300.3C	558.963	1.94404	0.358096	5.42883	5.67233e-08	5.62496e-06	181.861	279.776	1053.34	720.875
432	BraA02g021020.3C	519.34	1.95059	0.356737	5.46787	4.55464e-08	4.65941e-06	267.903	158.577	905.244	745.635
433	BraA10g009310.3C	595.517	1.95304	0.352488	5.54074	3.01199e-08	3.19493e-06	192.616	296.766	1106.1	786.583
434	BraA03g051690.3C	269.022	1.95883	0.423224	4.62835	3.68585e-06	0.000239091	134.929	84.9522	558.141	298.063
435	BraA03g056330.3C	100.314	1.96182	0.477114	4.11184	3.92523e-05	0.00186751	40.0877	41.9098	189.75	129.51
436	BraA04g003720.3C	472.456	1.96203	0.376766	5.20757	1.91331e-07	1.66735e-05	164.262	222.008	961.706	541.847
437	BraA01g013280.3C	1707.47	1.96296	0.378768	5.18248	2.18958e-07	1.86491e-05	635.536	758.906	3772.78	1662.68
438	BraA03g046300.3C	153.842	1.965	0.466025	4.2165	2.48121e-05	0.00125427	42.0432	83.8195	296.194	193.313
439	BraA08g016320.3C	458.906	1.96782	0.407545	4.82847	1.37583e-06	9.78273e-05	193.594	180.099	1018.17	443.762
440	BraA04g032130.3C	579.479	1.96825	0.327122	6.01686	1.77836e-09	2.4225e-07	231.726	240.132	1071.85	774.203
441	BraA10g017310.3C	1582.15	1.97065	0.353286	5.57806	2.43213e-08	2.64489e-06	586.649	700.006	3317.38	1724.58
442	BraA02g003760.3C	741.833	1.97214	0.403843	4.88343	1.04254e-06	7.51616e-05	203.372	399.842	1533.73	830.388
443	BraA04g029260.3C	9160.36	1.97407	0.339136	5.82088	5.85389e-09	7.30433e-07	4733.28	2700.35	17070.1	12137.8
444	BraA06g026130.3C	322.834	1.97684	0.433346	4.56181	5.07155e-06	0.000316294	113.419	148.383	722.899	306.634
445	BraA03g029130.3C	10037.2	1.98149	0.365179	5.42606	5.76106e-08	5.63847e-06	5463.66	2648.24	18951.8	13085.3
446	BraA03g031000.3C	2192.33	1.98205	0.365977	5.41578	6.10217e-08	5.91522e-06	829.131	942.403	4777.06	2220.72
447	BraA01g006740.3C	78.9809	1.98917	0.545378	3.64732	0.00026499	0.00873691	43.9987	19.2558	121.255	131.415
448	BraA02g004300.3C	101.324	1.99048	0.466654	4.26542	1.99526e-05	0.00105176	35.1989	46.4405	169.386	154.269
449	BraA06g010530.3C	107.525	1.99197	0.465967	4.27492	1.91204e-05	0.00101031	48.8874	37.379	196.229	147.603
450	BraA08g000320.3C	649.98	1.9939	0.333476	5.97914	2.24313e-09	2.96208e-07	252.259	269.582	1248.64	829.435
451	BraA02g023100.3C	481.406	1.99698	0.356255	5.60547	2.07696e-08	2.31706e-06	142.751	243.53	744.188	795.153
452	BraA07g026510.3C	942.244	1.99715	0.454149	4.39757	1.09467e-05	0.000611929	323.635	431.557	2319.57	694.212
453	BraA04g025600.3C	124.063	2.00508	0.530981	3.77619	0.000159247	0.00571495	46.9319	52.104	293.418	103.798
454	BraA03g002480.3C	195.863	2.00715	0.494161	4.06174	4.87089e-05	0.0022313	80.1754	75.8906	468.357	159.031
455	BraA06g031850.3C	1223.07	2.00992	0.376354	5.34052	9.26808e-08	8.56702e-06	375.455	598.064	2573.19	1345.57
456	BraA05g029670.3C	2761.77	2.01099	0.282375	7.12171	1.06595e-12	2.93499e-10	1073.57	1122.5	4839.08	4011.95
457	BraA08g024350.3C	1069.07	2.012	0.342409	5.87603	4.20229e-09	5.35782e-07	465.408	383.984	2161.29	1265.58
458	BraA02g012210.3C	72.7262	2.01678	0.547959	3.68053	0.000232748	0.0078642	38.1322	19.2558	124.957	108.56
459	BraA03g028510.3C	734.732	2.01784	0.320192	6.30196	2.93896e-10	4.97165e-08	271.814	310.359	1359.72	997.036
460	BraA07g015350.3C	761.695	2.01973	0.321656	6.27916	3.40402e-10	5.57613e-08	299.191	303.563	1437.47	1006.56
461	BraA06g026170.3C	127.629	2.02458	0.499309	4.05477	5.0183e-05	0.00227467	58.6649	41.9098	281.385	128.558
462	BraA07g028300.3C	307.849	2.02774	0.533826	3.79851	0.000145568	0.00535168	128.085	114.402	810.832	178.076
463	BraA07g038650.3C	901.258	2.02797	0.353382	5.73874	9.53827e-09	1.14291e-06	314.835	395.311	1852.14	1042.75
464	BraA06g037770.3C	953.796	2.03264	0.395556	5.13869	2.76666e-07	2.30247e-05	440.964	308.093	2122.42	943.709
465	BraA09g012460.3C	292.507	2.03416	0.383198	5.30836	1.10614e-07	1.00102e-05	92.8861	137.056	555.364	384.721
466	BraA03g009630.3C	75.5772	2.03572	0.517321	3.93512	8.31552e-05	0.00334196	25.4215	33.9809	129.585	113.321
467	BraA08g031480.3C	149.875	2.03612	0.531346	3.83201	0.0001271	0.00477445	35.1989	82.6868	338.772	142.842
468	BraA05g006360.3C	216.484	2.04433	0.412132	4.96038	7.03545e-07	5.30879e-05	108.53	60.0329	385.978	311.395
469	BraA06g013140.3C	404.645	2.05152	0.461544	4.44491	8.7927e-06	0.000511399	226.838	87.2176	862.666	441.858
470	BraA03g006120.3C	90.6623	2.05319	0.498612	4.11781	3.82493e-05	0.00182859	43.0209	27.1847	161.981	130.462
471	BraA03g053830.3C	145.182	2.05478	0.465907	4.41027	1.03243e-05	0.000583437	61.5981	50.9713	310.078	158.078
472	BraA03g020140.3C	338.482	2.05583	0.441134	4.66035	3.15678e-06	0.000208428	137.863	124.597	787.692	303.777
473	BraA09g056830.3C	1338.25	2.05999	0.311541	6.61225	3.78512e-11	7.59431e-09	616.959	417.965	2132.6	2185.48
474	BraA07g033760.3C	131.107	2.06498	0.440345	4.68947	2.73913e-06	0.000182717	55.7316	45.3078	244.36	179.029
475	BraA06g044870.3C	1849.19	2.06752	0.355251	5.81988	5.88899e-09	7.30433e-07	730.378	694.343	3988.44	1983.6
476	BraA09g031640.3C	552.729	2.07608	0.46951	4.4218	9.78837e-06	0.000559255	316.79	106.473	1182	605.65
477	BraA09g047490.3C	1235.08	2.07908	0.360403	5.76875	7.98623e-09	9.74998e-07	334.39	611.656	2364.93	1629.35
478	BraA03g005860.3C	291.533	2.08026	0.451689	4.60552	4.11427e-06	0.000262927	107.552	115.535	684.024	259.02
479	BraAnng003590.3C	548.778	2.08094	0.353146	5.89258	3.80219e-09	4.8717e-07	165.239	254.857	1025.57	749.444
480	BraA05g007800.3C	109.606	2.08363	0.46921	4.44072	8.96568e-06	0.000519127	43.9987	39.6444	212.89	141.89
481	BraA05g005940.3C	205.475	2.08428	0.514009	4.05494	5.01465e-05	0.00227467	43.9987	113.27	464.655	199.979
482	BraA09g005500.3C	62.7436	2.08961	0.562059	3.71777	0.000200989	0.00694524	28.3547	19.2558	113.85	89.5143
483	BraA10g029550.3C	2744.79	2.10419	0.334141	6.2973	3.02867e-10	4.99288e-08	1231.96	839.328	5444.42	3463.44
484	BraA02g008780.3C	796.571	2.10648	0.318255	6.61883	3.62053e-11	7.32082e-09	299.191	301.297	1507.81	1077.98
485	BraA10g020350.3C	177.957	2.11572	0.48287	4.38156	1.17834e-05	0.000655869	73.3311	60.0329	414.672	163.792
486	BraA08g016290.3C	180.869	2.11812	0.433356	4.8877	1.02019e-06	7.39623e-05	75.2866	60.0329	375.797	212.358
487	BraA02g008140.3C	612.343	2.11909	0.309872	6.83859	7.99784e-12	1.89908e-09	216.082	242.397	1035.75	955.136
488	BraA01g036100.3C	342.497	2.12075	0.338933	6.25715	3.92072e-10	6.30287e-08	135.907	120.066	534.075	579.938
489	BraA10g028210.3C	208.172	2.12485	0.533298	3.98437	6.76608e-05	0.00282907	108.53	46.4405	506.307	171.41
490	BraA09g005570.3C	1202.88	2.13699	0.318108	6.71781	1.84478e-11	4.0809e-09	443.898	447.415	2357.52	1562.69
491	BraA05g006480.3C	122.66	2.13961	0.558214	3.83295	0.000126613	0.00476442	25.4215	65.6964	279.533	119.987
492	BraA03g021170.3C	432.303	2.14883	0.439786	4.88609	1.02857e-06	7.43619e-05	112.441	206.151	981.144	429.478
493	BraA07g034580.3C	187.363	2.14961	0.45991	4.67397	2.95431e-06	0.000196564	82.1309	55.5021	413.747	198.074
494	BraA05g014700.3C	125.181	2.1551	0.473232	4.55401	5.26333e-06	0.000326562	58.6649	32.8482	240.658	168.553
495	BraA07g011580.3C	113.688	2.15665	0.47161	4.57296	4.80883e-06	0.000301361	46.9319	36.2463	224.923	146.651
496	BraA06g004920.3C	1265.39	2.16106	0.360826	5.9892	2.10877e-09	2.79893e-07	548.517	376.055	2666.67	1470.32
497	BraA03g023210.3C	3103.71	2.16476	0.323676	6.68805	2.26165e-11	4.75903e-09	1385.47	877.84	5775.79	4375.72
498	BraA05g035990.3C	69.3867	2.16561	0.585172	3.7008	0.000214921	0.0073579	23.466	27.1847	156.428	70.4687
499	BraA07g035160.3C	130.184	2.18166	0.46473	4.69447	2.67295e-06	0.000180159	58.6649	35.1136	252.691	174.267
500	BraA05g027730.3C	244.788	2.18937	0.585158	3.7415	0.000182924	0.00643267	82.1309	94.0138	685.875	117.13
501	BraA05g024920.3C	864.814	2.19645	0.370213	5.93295	2.97543e-09	3.86986e-07	389.144	229.937	1767.91	1072.27
502	BraA09g043880.3C	2619.98	2.19656	0.316108	6.94877	3.68481e-12	9.35004e-10	907.35	969.588	5284.29	3318.69
503	BraA06g028310.3C	346.806	2.19825	0.395493	5.55824	2.72502e-08	2.92651e-06	104.619	143.852	733.081	405.671
504	BraA03g028360.3C	255.79	2.20156	0.571945	3.84925	0.000118479	0.00452951	135.907	46.4405	662.735	178.076
505	BraA04g023120.3C	472.284	2.20179	0.35288	6.23949	4.38995e-10	6.92861e-08	188.705	148.383	931.161	620.886
506	BraA08g031470.3C	149.356	2.20524	0.486079	4.5368	5.71149e-06	0.000347823	57.6871	48.7059	342.475	148.556
507	BraA04g029130.3C	139.02	2.2079	0.425452	5.18954	2.10811e-07	1.81188e-05	55.7316	43.0425	223.997	233.308
508	BraA03g002170.3C	411.288	2.20921	0.35914	6.1514	7.6801e-10	1.13586e-07	172.084	120.066	568.323	784.678
509	BraA02g014130.3C	612.298	2.21424	0.349013	6.34429	2.23454e-10	3.90772e-08	219.016	215.212	1257.9	757.062
510	BraA09g017590.3C	563.475	2.21602	0.366441	6.04741	1.47193e-09	2.05926e-07	204.349	194.824	1200.51	654.216
511	BraA07g028290.3C	268.592	2.21637	0.443287	4.99984	5.73768e-07	4.39357e-05	116.352	73.6253	604.422	279.97
512	BraA10g003150.3C	76.1559	2.2164	0.540628	4.09967	4.13746e-05	0.00195412	32.2657	21.5212	151.8	99.037
513	BraA03g029380.3C	315.505	2.2259	0.458546	4.85427	1.20834e-06	8.68729e-05	128.085	94.0138	758.998	280.922
514	BraA09g053590.3C	370.6	2.22953	0.437749	5.09317	3.52126e-07	2.83917e-05	181.861	78.156	771.957	450.428
515	BraA09g059020.3C	83.9874	2.22988	0.617637	3.61033	0.000305804	0.00982704	43.9987	14.7251	194.378	82.8483
516	BraA03g055670.3C	1043.17	2.23441	0.396432	5.63631	1.73736e-08	1.97221e-06	418.476	312.624	2411.21	1030.37
517	BraA02g015030.3C	83.1073	2.24321	0.585552	3.83094	0.000127656	0.00478838	43.9987	13.5924	111.998	162.84
518	BraA03g044400.3C	722.733	2.24371	0.343416	6.53351	6.4245e-11	1.24089e-08	280.614	223.141	1460.61	926.568
519	BraA03g031040.3C	80.0778	2.24512	0.506825	4.42977	9.43317e-06	0.000540153	26.3992	29.4501	141.618	122.844
520	BraA09g025150.3C	96.5421	2.24586	0.554166	4.05268	5.06342e-05	0.00228206	49.8652	16.9904	187.898	131.415
521	BraA03g031030.3C	367.728	2.24705	0.360219	6.23803	4.4312e-10	6.95081e-08	136.885	118.933	727.527	487.567
522	BraA05g038350.3C	340.324	2.26096	0.412784	5.47734	4.31763e-08	4.46995e-06	94.8416	140.454	746.04	379.959
523	BraA10g013010.3C	6003.33	2.26531	0.374248	6.05298	1.42194e-09	2.01108e-07	1300.41	2835.14	11734.9	8142.94
524	BraA05g002320.3C	197.396	2.26946	0.474335	4.78451	1.71402e-06	0.000119575	49.8652	86.0849	449.845	203.788
525	BraA09g011200.3C	217.563	2.26962	0.483451	4.69462	2.67103e-06	0.000180159	87.0196	62.2983	526.671	194.265
526	BraA06g006960.3C	69.5597	2.27213	0.551282	4.12154	3.76349e-05	0.00180384	19.555	28.3174	135.139	95.2279
527	BraA01g004640.3C	197.446	2.27388	0.426449	5.33211	9.70786e-08	8.90988e-06	76.2644	58.9002	415.598	239.022
528	BraA09g036520.3C	252.531	2.27499	0.377856	6.0208	1.7356e-09	2.37676e-07	87.9973	84.9522	491.498	345.677
529	BraA02g011840.3C	7799.38	2.2784	0.295524	7.70969	1.26125e-14	4.66337e-12	2442.42	2889.51	15011.5	10854.1
530	BraA08g034260.3C	360.826	2.28668	0.363119	6.29734	3.02799e-10	4.99288e-08	107.552	138.189	708.09	489.472
531	BraA01g009520.3C	464.385	2.28799	0.350857	6.52113	6.97778e-11	1.33777e-08	128.085	188.028	870.071	671.357
532	BraA10g001720.3C	213.975	2.28902	0.487781	4.69272	2.69601e-06	0.000181242	68.4424	77.0233	527.596	182.838
533	BraA09g056160.3C	1030.51	2.28978	0.430084	5.32404	1.01488e-07	9.21651e-06	321.679	378.321	2560.23	861.813
534	BraA05g031030.3C	252.936	2.29708	0.370089	6.20682	5.40666e-10	8.28019e-08	93.8638	77.0233	462.804	378.055
535	BraA09g059040.3C	62.8317	2.30089	0.626214	3.67429	0.00023851	0.00801704	26.3992	15.8577	147.172	61.8982
536	BraA07g015340.3C	705.699	2.30384	0.373619	6.16627	6.99207e-10	1.0583e-07	267.903	207.283	1544.84	802.771
537	BraA01g036690.3C	806.168	2.31225	0.418331	5.52733	3.2515e-08	3.42095e-06	211.194	329.615	1904.9	778.964
538	BraA08g028080.3C	81.3822	2.3221	0.611022	3.80035	0.00014449	0.00531962	38.1322	15.8577	193.452	78.0869
539	BraA03g015480.3C	351.35	2.32699	0.386899	6.01448	1.8047e-09	2.44551e-07	104.619	129.127	747.891	423.764
540	BraA01g002270.3C	189.087	2.3286	0.474124	4.91138	9.04394e-07	6.64987e-05	65.5091	60.0329	448.92	181.885
541	BraA03g029760.3C	1418.07	2.3321	0.3244	7.18896	6.52864e-13	1.83954e-10	362.745	577.675	2545.42	2186.43
542	BraA10g015140.3C	66.885	2.33486	0.591128	3.94984	7.82048e-05	0.00317755	20.5327	23.7866	151.8	71.4209
543	BraA05g001540.3C	1060.03	2.35346	0.45175	5.20966	1.89185e-07	1.65422e-05	338.301	355.667	2747.2	798.962
544	BraA03g014760.3C	590.529	2.35469	0.332553	7.08064	1.43491e-12	3.86858e-10	208.26	177.833	824.716	1151.31
545	BraA09g022500.3C	1874.88	2.35619	0.357437	6.59191	4.34204e-11	8.64466e-09	710.823	514.244	4101.37	2173.1
546	BraA07g036860.3C	457.956	2.35768	0.374348	6.29809	3.01343e-10	4.99288e-08	196.527	101.943	786.766	746.587
547	BraA09g012230.3C	598.694	2.36289	0.3787	6.23948	4.39028e-10	6.92861e-08	199.461	190.293	1338.43	666.596
548	BraA08g008830.3C	289.269	2.36469	0.456293	5.1824	2.19045e-07	1.86491e-05	123.196	64.5637	664.586	304.729
549	BraA01g009270.3C	240.685	2.36806	0.482826	4.90459	9.36235e-07	6.86448e-05	94.8416	61.1656	589.612	217.12
550	BraA02g036250.3C	88.1613	2.38396	0.59108	4.03323	5.50161e-05	0.00243583	19.555	37.379	213.815	81.896
551	BraA08g028250.3C	68.8429	2.38469	0.562087	4.24256	2.20982e-05	0.00114389	20.5327	23.7866	144.395	86.6574
552	BraA06g028100.3C	191.369	2.38846	0.446979	5.34356	9.11408e-08	8.45486e-06	61.5981	61.1656	432.259	210.454
553	BraA04g027110.3C	51.4148	2.38879	0.645035	3.70335	0.000212769	0.00730356	12.7107	20.3885	59.2389	113.321
554	BraA07g011650.3C	598.429	2.38999	0.368028	6.49405	8.35563e-11	1.54916e-08	219.016	164.241	1281.97	728.494
555	BraA07g040260.3C	143.783	2.3947	0.584419	4.09757	4.1751e-05	0.00196116	73.3311	18.1231	333.219	150.46
556	BraA07g018270.3C	243.2	2.39821	0.378959	6.32841	2.47696e-10	4.27391e-08	79.1976	75.8906	472.985	344.725
557	BraA07g014730.3C	84.9953	2.39838	0.505848	4.74131	2.1234e-06	0.000145776	30.3102	23.7866	158.279	127.605
558	BraA03g045340.3C	374.805	2.40151	0.356839	6.72996	1.69711e-11	3.81952e-09	108.53	130.26	740.486	519.945
559	BraA03g053840.3C	139.414	2.4065	0.603036	3.99064	6.58954e-05	0.00276867	65.5091	22.6539	362.838	106.655
560	BraA05g023340.3C	76.5233	2.40976	0.583863	4.12728	3.67084e-05	0.00176925	31.2879	16.9904	174.014	83.8006
561	BraA10g012990.3C	532.328	2.41215	0.462874	5.21124	1.87578e-07	1.64573e-05	214.127	122.331	1331.95	460.903
562	BraA05g000150.3C	1177.17	2.41281	0.388639	6.20834	5.35464e-10	8.24933e-08	325.59	419.098	2755.53	1208.44
563	BraA05g013260.3C	1765.13	2.42283	0.34721	6.978	2.99407e-12	7.74925e-10	559.272	550.49	3900.51	2050.26
564	BraA09g044930.3C	141.186	2.42511	0.549412	4.41402	1.0147e-05	0.000574672	56.7094	31.7155	357.284	119.035
565	BraA03g048190.3C	50.885	2.43118	0.616018	3.94661	7.9266e-05	0.00320819	12.7107	19.2558	93.4863	78.0869
566	BraA05g006820.3C	1188.82	2.43408	0.39541	6.15585	7.46776e-10	1.11723e-07	492.785	249.193	2597.25	1416.04
567	BraA02g002870.3C	490.164	2.4359	0.33885	7.18875	6.53882e-13	1.83954e-10	126.13	180.099	881.178	773.251
568	BraA08g029330.3C	9293.61	2.4393	0.320002	7.62278	2.48263e-14	8.80211e-12	2685.87	3101.32	19659	11728.3
569	BraA04g029740.3C	2211.6	2.44085	0.289179	8.44064	3.15611e-17	2.04216e-14	703.001	672.822	4166.16	3304.41
570	BraA02g009480.3C	376.816	2.44103	0.362949	6.72556	1.74914e-11	3.90269e-09	114.397	120.066	773.808	498.994
571	BraA09g059600.3C	197.065	2.44233	0.424589	5.75222	8.80802e-09	1.06528e-06	63.5536	58.9002	423.928	241.879
572	BraA10g018980.3C	681.326	2.45569	0.43224	5.68132	1.33658e-08	1.53068e-06	289.413	130.26	1547.62	758.014
573	BraA01g044260.3C	517.555	2.45751	0.37921	6.4806	9.13592e-11	1.67699e-08	191.639	126.862	1107.03	644.693
574	BraA04g021150.3C	402.105	2.46412	0.458577	5.37341	7.72625e-08	7.40633e-06	168.173	78.156	946.896	415.194
575	BraA10g021100.3C	2778.71	2.47663	0.330942	7.4836	7.23161e-14	2.36922e-11	679.535	1013.76	5661.94	3759.6
576	BraA03g058520.3C	186.073	2.47701	0.437971	5.65566	1.5525e-08	1.77012e-06	56.7094	56.6348	410.97	219.977
577	BraA08g002630.3C	193.452	2.4797	0.480532	5.16031	2.46536e-07	2.07171e-05	49.8652	67.9618	467.432	188.551
578	BraA03g047600.3C	973.481	2.48127	0.354006	7.00914	2.39795e-12	6.33303e-10	299.191	292.236	2148.33	1154.16
579	BraA09g000290.3C	727.589	2.48232	0.344736	7.20065	5.99246e-13	1.7233e-10	198.483	243.53	1518.92	949.422
580	BraA04g028090.3C	552.122	2.49066	0.432489	5.75889	8.46701e-09	1.02884e-06	130.041	203.885	1338.43	536.133
581	BraA09g020720.3C	1483.32	2.49276	0.418632	5.95453	2.60815e-09	3.40931e-07	623.803	270.714	3329.41	1709.34
582	BraA03g040010.3C	74.7423	2.49757	0.567012	4.40479	1.05888e-05	0.000597079	14.6662	30.5828	150.874	102.846
583	BraA02g021690.3C	171.186	2.50858	0.483441	5.18901	2.11416e-07	1.81188e-05	30.3102	72.4926	360.061	221.881
584	BraA02g010780.3C	105.6	2.51316	0.629111	3.99478	6.4754e-05	0.00273403	47.9097	14.7251	271.203	88.562
585	BraA02g009470.3C	3034.9	2.51529	0.333887	7.53335	4.94548e-14	1.66232e-11	714.734	1093.05	6227.49	4104.32
586	BraA08g019990.3C	136.363	2.53117	0.542521	4.66558	3.07751e-06	0.000203714	43.0209	37.379	351.731	113.321
587	BraAnng003710.3C	205.094	2.53233	0.452384	5.59774	2.17162e-08	2.40197e-06	58.6649	62.2983	480.39	219.024
588	BraA08g022310.3C	879.028	2.53484	0.474233	5.34514	9.03494e-08	8.41159e-06	405.766	111.004	1862.32	1137.02
589	BraA06g002980.3C	329.667	2.53608	0.374168	6.77792	1.2192e-11	2.81745e-09	98.7526	95.1465	689.578	435.192
590	BraA06g025490.3C	285.878	2.54759	0.45457	5.60439	2.08993e-08	2.32153e-06	66.4869	100.81	689.578	286.636
591	BraA06g019700.3C	139.586	2.55239	0.495295	5.15328	2.55969e-07	2.14401e-05	44.9764	36.2463	329.516	147.603
592	BraA08g012680.3C	851.552	2.55436	0.351137	7.27453	3.47616e-13	1.04616e-10	254.215	241.264	1864.17	1046.55
593	BraA04g025790.3C	184.324	2.5615	0.465319	5.50482	3.69543e-08	3.85666e-06	46.9319	60.0329	432.259	198.074
594	BraA05g024120.3C	341	2.5631	0.393207	6.51845	7.10383e-11	1.34205e-08	130.041	66.8291	640.52	526.61
595	BraA06g029930.3C	56.3641	2.56975	0.599439	4.28693	1.81159e-05	0.000962785	16.6217	15.8577	77.751	115.226
596	BraA09g036670.3C	252.29	2.57097	0.430401	5.97342	2.32335e-09	3.05243e-07	92.8861	52.104	546.108	318.061
597	BraA07g038900.3C	175.656	2.57397	0.473658	5.43423	5.50323e-08	5.47826e-06	73.3311	27.1847	321.186	280.922
598	BraA08g011600.3C	73.4573	2.58701	0.533644	4.84782	1.24827e-06	8.94952e-05	21.5105	20.3885	113.85	138.081
599	BraA10g029880.3C	69.6494	2.5975	0.571212	4.54734	5.43285e-06	0.000333998	13.6885	26.052	137.916	100.942
600	BraA10g019840.3C	4024.96	2.59825	0.338821	7.66851	1.74003e-14	6.34302e-12	1096.06	1185.93	9012.64	4805.2
601	BraA03g046420.3C	161.184	2.61737	0.488125	5.36208	8.22684e-08	7.77106e-06	52.7984	37.379	385.053	169.506
602	BraA07g043020.3C	3121.38	2.62715	0.369809	7.10406	1.21141e-12	3.30039e-10	606.204	1133.83	6742.12	4003.38
603	BraA03g053600.3C	241.256	2.62895	0.372145	7.06432	1.61408e-12	4.30677e-10	67.4646	66.8291	450.771	379.959
604	BraA01g017010.3C	1015.27	2.63417	0.42023	6.2684	3.64776e-10	5.93782e-08	290.391	272.98	2578.74	918.95
605	BraA07g005400.3C	372.21	2.64895	0.394427	6.71595	1.86844e-11	4.09822e-09	101.686	103.075	845.08	439.001
606	BraA06g001960.3C	128.486	2.6603	0.439635	6.05114	1.43823e-09	2.02305e-07	36.1767	33.9809	230.476	213.311
607	BraA09g021180.3C	1170.01	2.66464	0.395597	6.73575	1.63092e-11	3.70275e-09	322.657	314.89	2873.09	1169.4
608	BraA07g024750.3C	124.294	2.66841	0.511685	5.21494	1.83873e-07	1.61871e-05	30.3102	37.379	297.12	132.367
609	BraA07g041760.3C	54.0769	2.66895	0.599817	4.44961	8.60259e-06	0.000502601	14.6662	14.7251	89.7839	97.1325
610	BraA01g015940.3C	113.841	2.69646	0.551153	4.89239	9.96183e-07	7.24247e-05	39.1099	21.5212	280.459	114.274
611	BraA08g002470.3C	412.58	2.70456	0.389937	6.9359	4.03652e-12	1.00455e-09	108.53	111.004	942.268	488.519
612	BraA09g061310.3C	165.83	2.71368	0.534367	5.0783	3.80828e-07	3.05157e-05	63.5536	23.7866	401.714	174.267
613	BraA03g032740.3C	82.0844	2.71522	0.632226	4.2947	1.7493e-05	0.000935442	27.377	15.8577	218.443	66.6596
614	BraA07g034050.3C	1138.68	2.71976	0.318494	8.53944	1.34874e-17	1.02671e-14	277.681	322.818	2333.46	1620.78
615	BraA05g004040.3C	1473.81	2.73018	0.392334	6.95882	3.43143e-12	8.79329e-10	535.806	235.601	3086.9	2036.93
616	BraA04g011840.3C	186.955	2.73411	0.429151	6.37097	1.87832e-10	3.35274e-08	47.9097	49.8386	408.193	241.879
617	BraA02g022510.3C	127.971	2.73514	0.477908	5.72315	1.04567e-08	1.24053e-06	36.1767	30.5828	283.236	161.887
618	BraA05g036630.3C	347.621	2.74196	0.472145	5.80746	6.34277e-09	7.81731e-07	119.285	61.1656	870.071	339.964
619	BraA02g008710.3C	465.965	2.74363	0.4091	6.7065	1.99354e-11	4.33587e-09	131.018	111.004	1119.98	501.851
620	BraA03g042950.3C	6223.64	2.74533	0.323546	8.48513	2.15485e-17	1.50807e-14	1598.62	1632.22	13736	7927.73
621	BraA10g002430.3C	94.0639	2.75229	0.556387	4.94671	7.5477e-07	5.64594e-05	30.3102	18.1231	223.071	104.751
622	BraA07g016220.3C	264.244	2.7574	0.382272	7.21318	5.46602e-13	1.58957e-10	61.5981	74.7579	536.852	383.769
623	BraA07g027310.3C	413.099	2.7645	0.517097	5.34619	8.98273e-08	8.39318e-06	159.373	52.104	1053.34	387.578
624	BraA10g028150.3C	250.138	2.77404	0.404068	6.86526	6.63695e-12	1.62054e-09	58.6649	69.0945	544.257	328.536
625	BraA03g038910.3C	131.957	2.77876	0.655125	4.24158	2.2195e-05	0.00114661	17.5995	49.8386	381.35	79.0392
626	BraA10g033570.3C	100.69	2.78193	0.489567	5.68243	1.32792e-08	1.52753e-06	28.3547	22.6539	152.725	199.026
627	BraA08g016550.3C	5977.42	2.78544	0.337783	8.24623	1.6347e-16	8.81445e-14	1913.45	1114.57	12224.5	8657.17
628	BraA04g020810.3C	171.762	2.78971	0.458359	6.08631	1.15546e-09	1.65448e-07	37.1544	49.8386	392.458	207.597
629	BraA07g034640.3C	114.793	2.81474	0.507595	5.54526	2.93522e-08	3.12631e-06	24.4437	32.8482	263.798	138.081
630	BraA03g043240.3C	3231.72	2.83644	0.294559	9.62945	6.00497e-22	1.19554e-18	671.713	916.351	5418.51	5920.32
631	BraA09g057120.3C	2168.56	2.83864	0.361333	7.85603	3.965e-15	1.5788e-12	629.67	433.823	4986.25	2624.48
632	BraA07g042700.3C	137.017	2.83986	0.548297	5.17942	2.22573e-07	1.88873e-05	42.0432	24.9193	356.359	124.749
633	BraA10g031050.3C	340.773	2.84661	0.451826	6.30023	2.97198e-10	4.99288e-08	94.8416	71.3599	863.592	333.298
634	BraA06g016580.3C	153.289	2.84788	0.567061	5.02217	5.10899e-07	3.98286e-05	51.8207	22.6539	407.267	131.415
635	BraA06g012060.3C	481.334	2.84985	0.489697	5.81962	5.89833e-09	7.30433e-07	121.241	113.27	1336.58	354.248
636	BraA06g011800.3C	435.16	2.85084	0.439021	6.49362	8.37964e-11	1.54916e-08	106.575	105.341	1112.58	416.146
637	BraA05g007270.3C	42.1907	2.85112	0.702358	4.05935	4.9209e-05	0.00224626	14.6662	5.66348	70.3462	78.0869
638	BraA06g012940.3C	167.39	2.85119	0.601823	4.73759	2.16274e-06	0.000148085	59.6426	21.5212	466.506	121.892
639	BraA09g041510.3C	73.471	2.85418	0.564336	5.05759	4.24596e-07	3.36067e-05	17.5995	18.1231	161.981	96.1802
640	BraA03g007300.3C	7770.27	2.85438	0.3364	8.48507	2.15589e-17	1.50807e-14	1668.04	2107.95	17567.1	9738.01
641	BraA10g000590.3C	1309.64	2.85926	0.424414	6.73694	1.61752e-11	3.70275e-09	431.187	202.753	3160.95	1443.66
642	BraA05g006080.3C	140.718	2.86329	0.621022	4.61061	4.01494e-06	0.000257214	27.377	40.7771	412.821	81.896
643	BraA03g008300.3C	54.7226	2.86445	0.769979	3.72017	0.000199093	0.00690739	20.5327	5.66348	153.651	39.0435
644	BraA10g011230.3C	109.738	2.8651	0.511109	5.60565	2.07476e-08	2.31706e-06	31.2879	21.5212	248.063	138.081
645	BraA07g030330.3C	308.908	2.86892	0.428399	6.69683	2.12983e-11	4.59368e-09	76.2644	72.4926	748.816	338.059
646	BraA06g009040.3C	45.1173	2.87587	0.695879	4.13271	3.58504e-05	0.00173436	14.6662	6.79618	99.9656	59.0413
647	BraA10g033400.3C	300.415	2.88287	0.431202	6.68567	2.29869e-11	4.79796e-09	98.7526	44.1752	634.967	423.764
648	BraA03g025600.3C	76.3595	2.88335	0.661615	4.35805	1.31229e-05	0.00072574	20.5327	15.8577	213.815	55.2322
649	BraA06g032430.3C	580.139	2.88558	0.338937	8.51361	1.68594e-17	1.24673e-14	133.952	142.72	1212.55	831.34
650	BraA05g004090.3C	647.455	2.88982	0.451667	6.39813	1.57294e-10	2.84691e-08	83.1086	225.407	1499.48	781.821
651	BraA07g040190.3C	2009.77	2.89194	0.293189	9.86374	5.9779e-23	1.5472e-19	451.72	502.917	3950.49	3133.95
652	BraA06g027220.3C	298.457	2.89482	0.432498	6.69327	2.18242e-11	4.64013e-09	96.7971	44.1752	640.52	412.337
653	BraA03g058360.3C	325.368	2.89974	0.470787	6.15933	7.30524e-10	1.09927e-07	56.7094	97.4119	831.195	316.157
654	BraA10g032760.3C	1777.76	2.90202	0.39923	7.26903	3.62083e-13	1.07718e-10	555.361	283.174	4168.94	2103.59
655	BraA03g047620.3C	132.693	2.90566	0.525212	5.53235	3.15974e-08	3.33798e-06	35.1989	27.1847	335.07	133.319
656	BraA04g021110.3C	79.033	2.91868	0.568405	5.13487	2.82345e-07	2.33626e-05	26.3992	10.1943	147.172	132.367
657	BraA02g005610.3C	49.3251	2.92533	0.705479	4.14658	3.37477e-05	0.00164493	12.7107	10.1943	127.734	46.6617
658	BraA07g036810.3C	77.3308	2.93732	0.681004	4.31322	1.60892e-05	0.000871174	26.3992	9.06157	211.964	61.8982
659	BraA03g005140.3C	98.362	2.94642	0.539405	5.46236	4.6984e-08	4.76878e-06	12.7107	32.8482	154.576	193.313
660	BraA03g030950.3C	107.966	2.9471	0.635438	4.6379	3.51971e-06	0.000229464	31.2879	18.1231	310.078	72.3732
661	BraA06g011580.3C	201.738	2.96051	0.465805	6.35568	2.07502e-10	3.67848e-08	49.8652	41.9098	495.2	219.977
662	BraA06g033180.3C	964.424	2.96715	0.354022	8.38126	5.23661e-17	3.08032e-14	243.459	193.691	2182.58	1237.96
663	BraA04g024120.3C	67.9362	2.97762	0.690574	4.31181	1.61923e-05	0.000874926	13.6885	16.9904	193.452	47.614
664	BraA05g033880.3C	1488.86	3.00123	0.343369	8.74055	2.31977e-18	2.00134e-15	307.991	353.401	3392.35	1901.7
665	BraA08g018110.3C	699.085	3.01541	0.383431	7.8643	3.71172e-15	1.50104e-12	190.661	116.668	1594.82	894.19
666	BraA03g040660.3C	373.188	3.02223	0.36289	8.32822	8.20656e-17	4.72005e-14	99.7303	63.431	686.801	642.789
667	BraA06g005560.3C	38.0167	3.02428	0.747442	4.04618	5.20608e-05	0.00232718	9.77748	6.79618	89.7839	45.7094
668	BraA01g007360.3C	591.72	3.02558	0.371897	8.13553	4.10153e-16	2.00294e-13	124.174	134.791	1369.9	738.016
669	BraA09g002590.3C	1717.33	3.03945	0.330061	9.20877	3.29898e-20	4.06591e-17	411.632	333.013	3780.18	2344.51
670	BraA07g038220.3C	199.773	3.03965	0.533115	5.70167	1.18639e-08	1.38942e-06	46.9319	39.6444	554.439	158.078
671	BraA03g059720.3C	4296.85	3.04117	0.330938	9.18953	3.94556e-20	4.64178e-17	989.481	872.176	9790.15	5535.6
672	BraA02g044760.3C	418.078	3.04753	0.379003	8.04091	8.91741e-16	4.12143e-13	74.3089	106.473	916.351	575.177
673	BraA05g039750.3C	322.993	3.06583	0.447482	6.8513	7.31837e-12	1.75383e-09	74.3089	63.431	823.791	330.441
674	BraA06g041730.3C	651.127	3.0739	0.36543	8.41173	4.04008e-17	2.48965e-14	150.573	125.729	1491.15	837.054
675	BraA06g015790.3C	553.591	3.09337	0.382582	8.08553	6.18961e-16	2.96666e-13	145.684	86.0849	1224.58	758.014
676	BraA03g033660.3C	629.203	3.09633	0.365208	8.47826	2.28589e-17	1.51701e-14	107.552	156.312	1393.04	859.908
677	BraA08g011610.3C	27.8566	3.10091	0.830672	3.73301	0.000189204	0.0066265	4.88874	6.79618	41.6523	58.089
678	BraA01g030930.3C	35.0684	3.1129	0.823713	3.77911	0.000157389	0.00568817	8.79973	5.66348	95.3376	30.4729
679	BraA09g065840.3C	10190.5	3.11332	0.380641	8.17917	2.85815e-16	1.45048e-13	2857.96	1363.77	22885.6	13654.7
680	BraA01g015910.3C	466.18	3.13099	0.416726	7.51331	5.76503e-14	1.91296e-11	79.1976	112.137	1148.68	524.706
681	BraA03g027430.3C	28.354	3.1422	0.84872	3.70228	0.000213668	0.0073247	5.86649	5.66348	33.3219	68.5641
682	BraA03g053410.3C	34.8688	3.15004	0.842761	3.73777	0.000185663	0.00651128	12.7107	1.1327	68.4949	57.1368
683	BraA01g017340.3C	244.448	3.15713	0.408515	7.72832	1.08976e-14	4.0877e-12	41.0654	57.7675	528.522	350.439
684	BraA07g041220.3C	81.659	3.17322	0.544418	5.82864	5.58793e-09	7.02072e-07	15.644	16.9904	174.014	119.987
685	BraA09g008560.3C	1591.06	3.17394	0.443461	7.1572	8.23431e-13	2.29162e-10	436.076	198.222	4095.81	1634.11
686	BraA02g000270.3C	554.299	3.1768	0.425799	7.4608	8.59958e-14	2.74783e-11	115.374	105.341	1436.54	559.94
687	BraA01g038200.3C	1574.23	3.17857	0.410472	7.74371	9.65606e-15	3.73012e-12	248.348	378.321	4051.38	1618.87
688	BraA03g003810.3C	335.603	3.18204	0.398096	7.99316	1.31526e-15	5.86922e-13	84.0863	48.7059	719.197	490.424
689	BraA09g005650.3C	526.949	3.18263	0.387788	8.20713	2.26538e-16	1.17265e-13	142.751	65.6964	1007.06	892.286
690	BraA02g019000.3C	31.3691	3.19545	0.816457	3.9138	9.08535e-05	0.00359003	8.79973	3.39809	67.5693	45.7094
691	BraA06g015130.3C	613.586	3.19874	0.481752	6.63981	3.14078e-11	6.45156e-09	191.639	48.7059	1323.62	890.381
692	BraA10g027260.3C	80.7976	3.20227	0.661322	4.84222	1.28395e-06	9.15459e-05	23.466	7.92887	217.518	74.2778
693	BraA02g011820.3C	1553.17	3.20438	0.330094	9.70748	2.80168e-22	6.59209e-19	278.658	329.615	3460.85	2143.58
694	BraA05g012710.3C	136.972	3.20485	0.639389	5.01236	5.37663e-07	4.16641e-05	43.0209	10.1943	381.35	113.321
695	BraA09g032090.3C	999.907	3.23003	0.46568	6.93617	4.02868e-12	1.00455e-09	289.413	95.1465	2438.05	1177.02
696	BraA07g041690.3C	1799.69	3.23523	0.372236	8.69132	3.58247e-18	2.89755e-15	431.187	259.387	4219.84	2288.33
697	BraA01g033090.3C	137.673	3.24236	0.634466	5.11038	3.21506e-07	2.60853e-05	42.0432	10.1943	382.276	116.178
698	BraA01g024740.3C	194.107	3.25734	0.513897	6.3385	2.32006e-10	4.03005e-08	44.9764	28.3174	516.489	186.647
699	BraA02g041650.3C	59.7033	3.2631	0.69386	4.70282	2.56597e-06	0.000174769	16.6217	5.66348	152.725	63.8027
700	BraAnng003750.3C	62.5173	3.26912	0.705734	4.63222	3.61766e-06	0.000235257	7.82199	15.8577	174.014	52.3754
701	BraA07g040200.3C	152.129	3.28383	0.589316	5.57227	2.51443e-08	2.7116e-06	28.3547	28.3174	446.143	105.703
702	BraA06g001110.3C	292.868	3.28525	0.4128	7.95845	1.74206e-15	7.58368e-13	73.3311	35.1136	584.984	478.044
703	BraA10g022520.3C	28.399	3.29153	0.835248	3.94078	8.12184e-05	0.0032692	4.88874	5.66348	59.2389	43.8048
704	BraA02g019770.3C	36.6644	3.32055	0.813109	4.08376	4.43121e-05	0.00205904	9.77748	3.39809	93.4863	39.9957
705	BraA10g018650.3C	3653.98	3.32844	0.370487	8.98396	2.61181e-19	2.81662e-16	837.93	484.794	8614.63	4678.55
706	BraA01g016120.3C	105.212	3.33606	0.54877	6.07916	1.20811e-09	1.71804e-07	17.5995	20.3885	262.873	119.987
707	BraA03g042380.3C	535.678	3.34026	0.395875	8.43766	3.23742e-17	2.04368e-14	76.2644	116.668	1272.71	677.071
708	BraA02g022690.3C	141.779	3.35592	0.590416	5.684	1.31583e-08	1.52037e-06	24.4437	26.052	412.821	103.798
709	BraA01g019110.3C	107.167	3.36969	0.635739	5.30042	1.15536e-07	1.04192e-05	18.5772	19.2558	316.558	74.2778
710	BraA02g020820.3C	871.176	3.37112	0.41912	8.04332	8.74362e-16	4.11459e-13	110.486	197.089	2202.95	974.182
711	BraA01g003500.3C	261.699	3.37565	0.515497	6.54833	5.81831e-11	1.14083e-08	65.5091	26.052	690.503	264.734
712	BraA07g043150.3C	82.505	3.39019	0.624653	5.42732	5.72074e-08	5.63847e-06	20.5327	7.92887	209.187	92.3711
713	BraA07g029200.3C	242.181	3.39474	0.42711	7.94818	1.89274e-15	7.90128e-13	49.8652	33.9809	554.439	330.441
714	BraA09g036190.3C	29.3144	3.4012	0.928282	3.66397	0.000248335	0.00825085	8.79973	1.1327	75.8998	31.4252
715	BraA02g021420.3C	353.371	3.4189	0.469281	7.2854	3.20716e-13	9.76561e-11	50.8429	70.2272	952.45	339.964
716	BraA08g015700.3C	77.6534	3.42251	0.678893	5.04131	4.62364e-07	3.62633e-05	20.5327	5.66348	209.187	75.2301
717	BraA06g035910.3C	1598.75	3.42252	0.369804	9.25496	2.14305e-20	3.08146e-17	236.615	309.226	3923.65	1925.51
718	BraA07g010040.3C	868.075	3.4265	0.414268	8.27121	1.32607e-16	7.30239e-14	135.907	159.71	2284.4	892.286
719	BraA10g027040.3C	966.794	3.45162	0.433766	7.95732	1.75806e-15	7.58368e-13	157.417	166.506	2650.01	893.238
720	BraA06g030090.3C	3090.96	3.45477	0.407398	8.48008	2.25037e-17	1.51701e-14	731.356	301.297	7170.68	4160.51
721	BraA02g043370.3C	433.585	3.46048	0.435334	7.94902	1.87996e-15	7.90128e-13	75.2866	69.0945	1135.72	454.237
722	BraA02g008990.3C	343.128	3.47025	0.473851	7.32351	2.41566e-13	7.4431e-11	71.3756	41.9098	914.5	344.725
723	BraA03g041630.3C	38.5347	3.50913	0.805748	4.35512	1.32996e-05	0.000733944	7.82199	4.53078	102.742	39.0435
724	BraA09g051720.3C	26.6598	3.52823	0.917416	3.84583	0.000120144	0.00457963	2.93324	5.66348	67.5693	30.4729
725	BraA01g004240.3C	82.0231	3.55267	0.618801	5.74121	9.40042e-09	1.13164e-06	17.5995	7.92887	207.336	95.2279
726	BraA01g042290.3C	54.5812	3.56122	0.75935	4.68982	2.73448e-06	0.000182717	5.86649	11.327	158.279	42.8526
727	BraA09g017010.3C	36.4162	3.59033	0.84195	4.2643	2.00528e-05	0.00105489	9.77748	1.1327	82.3791	52.3754
728	BraA09g050760.3C	96.6345	3.63054	0.579497	6.26499	3.72841e-10	6.03117e-08	19.555	9.06157	236.03	121.892
729	BraA02g001730.3C	80.6161	3.63259	0.722075	5.03077	4.88516e-07	3.81987e-05	12.7107	11.327	251.765	46.6617
730	BraA10g029770.3C	97.6961	3.65784	0.572029	6.39449	1.6108e-10	2.8952e-08	21.5105	6.79618	210.113	152.365
731	BraA01g038870.3C	77.1491	3.66113	0.599601	6.10595	1.02188e-09	1.48586e-07	16.6217	5.66348	143.469	142.842
732	BraA02g045060.3C	273.486	3.66536	0.417747	8.77412	1.7224e-18	1.56264e-15	47.9097	31.7155	622.934	391.387
733	BraA03g002090.3C	33.8104	3.68934	1.00283	3.67894	0.000234208	0.00790321	1.9555	7.92887	111.073	14.2842
734	BraA01g007100.3C	108.105	3.69582	0.567291	6.51486	7.27577e-11	1.36458e-08	20.5327	10.1943	270.277	131.415
735	BraA08g016300.3C	688.776	3.70066	0.358347	10.327	5.31709e-25	1.52908e-21	86.0418	111.004	1578.16	979.895
736	BraA01g041600.3C	26.6134	3.72311	0.96818	3.84547	0.000120323	0.00457972	1.9555	5.66348	73.123	25.7115
737	BraA01g006130.3C	993.492	3.77677	0.458397	8.23908	1.73547e-16	9.16683e-14	192.616	77.0233	2612.06	1092.26
738	BraA03g005120.3C	280.593	3.806	0.502186	7.57886	3.48608e-14	1.20302e-11	43.0209	31.7155	788.618	259.02
739	BraA10g031980.3C	53.315	3.84267	0.715468	5.37085	7.8367e-08	7.48448e-06	3.91099	10.1943	127.734	71.4209
740	BraA10g026240.3C	857.084	3.84524	0.445531	8.6307	6.09775e-18	4.78248e-15	123.196	99.6773	2409.36	796.106
741	BraA09g001780.3C	23.4184	3.85276	1.05935	3.63692	0.000275918	0.00902819	5.86649	0	59.2389	28.5684
742	BraA06g013660.3C	41.4416	3.85795	0.816132	4.72711	2.27737e-06	0.000155522	2.93324	7.92887	110.147	44.7571
743	BraA10g003120.3C	27.3253	3.8581	1.05033	3.67324	0.000239495	0.00802927	6.84424	0	79.6022	22.8547
744	BraA06g010320.3C	613.307	3.86264	0.487247	7.92747	2.23647e-15	9.18797e-13	91.9083	65.6964	1795.68	499.947
745	BraA01g002330.3C	490.852	3.88819	0.407086	9.55127	1.28122e-21	2.2107e-18	76.2644	47.5732	1197.74	641.836
746	BraA07g030730.3C	32.9702	3.88845	0.841518	4.62076	3.82345e-06	0.000247397	4.88874	3.39809	73.123	50.4708
747	BraA04g016840.3C	266.431	3.89214	0.50321	7.73463	1.03704e-14	3.94717e-12	50.8429	15.8577	658.107	340.916
748	BraA05g009180.3C	693.177	3.91737	0.413063	9.4837	2.45425e-21	3.97006e-18	110.486	61.1656	1738.29	862.765
749	BraA06g042860.3C	3489.79	3.93182	0.335544	11.7178	1.03375e-31	8.91848e-28	385.233	473.467	8329.54	4770.92
750	BraA05g010730.3C	74.9529	3.93755	0.699604	5.62826	1.82042e-08	2.05747e-06	14.6662	3.39809	202.708	79.0392
751	BraA09g054360.3C	1339.82	3.99377	0.374167	10.6738	1.35043e-26	4.36899e-23	200.438	115.535	1849.36	3193.94
752	BraA01g036490.3C	22.4192	4.01431	1.007	3.98641	6.70806e-05	0.00281391	2.93324	2.26539	42.5779	41.9003
753	BraA03g018120.3C	76.582	4.01457	0.644986	6.22428	4.83761e-10	7.54259e-08	8.79973	9.06157	200.857	87.6097
754	BraA02g023560.3C	654.357	4.02225	0.43856	9.17148	4.66556e-20	5.25017e-17	79.1976	72.4926	1807.71	658.025
755	BraA06g013410.3C	185.107	4.07653	0.629734	6.47342	9.58078e-11	1.74627e-08	25.4215	15.8577	588.686	110.464
756	BraA02g043360.3C	264.199	4.07873	0.525748	7.75795	8.63102e-15	3.38467e-12	36.1767	22.6539	760.849	237.118
757	BraA06g026140.3C	2265.39	4.09809	0.348035	11.7749	5.25483e-32	6.80027e-28	247.37	252.591	5597.15	2964.45
758	BraA03g059850.3C	713.065	4.1246	0.33384	12.355	4.57573e-35	1.18429e-30	83.1086	71.3599	1520.77	1177.02
759	BraA01g037120.3C	99.6979	4.13792	0.602973	6.86253	6.76526e-12	1.63644e-09	17.5995	3.39809	207.336	170.458
760	BraA03g050480.3C	696.848	4.18682	0.432411	9.68248	3.57917e-22	7.71967e-19	87.0196	57.7675	1882.69	759.919
761	BraA01g009230.3C	278.669	4.19624	0.505674	8.2983	1.05614e-16	5.94237e-14	29.3324	28.3174	793.246	263.781
762	BraA03g014070.3C	528.589	4.21411	0.516288	8.16232	3.2864e-16	1.63574e-13	70.3979	37.379	1581.86	424.717
763	BraA03g058510.3C	25.9362	4.25925	1.06452	4.00111	6.30466e-05	0.00268384	3.91099	1.1327	77.751	20.9501
764	BraA04g028460.3C	408.545	4.27794	0.477105	8.96645	3.06225e-19	3.17028e-16	45.9542	33.9809	1152.38	401.862
765	BraA04g001930.3C	73.4923	4.28014	0.712138	6.01026	1.85221e-09	2.49681e-07	10.7552	3.39809	203.634	76.1823
766	BraA08g030540.3C	560.269	4.30424	0.449487	9.5759	1.00973e-21	1.86671e-18	63.5536	44.1752	1544.84	588.509
767	BraA05g012140.3C	101.596	4.33597	0.568298	7.62975	2.35203e-14	8.45491e-12	5.86649	13.5924	187.898	199.026
768	BraA01g003520.3C	27.0345	4.34711	1.11846	3.8867	0.000101617	0.00394904	4.88874	0	85.1559	18.0933
769	BraA02g043750.3C	1851.7	4.35399	0.472107	9.22247	2.90336e-20	3.89718e-17	255.192	89.483	5055.67	2006.45
770	BraA01g040660.3C	211.793	4.41997	0.479465	9.21855	3.0115e-20	3.89718e-17	18.5772	19.2558	532.224	277.113
771	BraA03g028380.3C	190.885	4.46106	0.606005	7.36141	1.81973e-13	5.67448e-11	20.5327	12.4597	589.612	140.937
772	BraA05g010510.3C	30.0868	4.46274	1.09169	4.08792	4.35267e-05	0.00203326	2.93324	2.26539	101.817	13.3319
773	BraA03g019690.3C	23.5771	4.47042	1.14791	3.89442	9.84357e-05	0.0038427	3.91099	0	68.4949	21.9024
774	BraA02g025510.3C	145.734	4.49293	0.602057	7.46264	8.4809e-14	2.74378e-11	16.6217	7.92887	417.449	140.937
775	BraA03g045760.3C	52.0959	4.55877	0.796685	5.72217	1.05172e-08	1.24053e-06	2.93324	5.66348	138.841	60.9459
776	BraA03g057220.3C	146.81	4.61156	0.549944	8.38551	5.0506e-17	3.03999e-14	11.733	11.327	183.27	380.912
777	BraA03g018550.3C	212.864	4.63168	0.527991	8.77228	1.75089e-18	1.56264e-15	22.4882	10.1943	568.323	250.449
778	BraA10g027780.3C	86.8705	4.6473	0.68225	6.81172	9.64379e-12	2.24865e-09	10.7552	2.26539	223.997	110.464
779	BraA08g021610.3C	160.373	4.65234	0.57889	8.03665	9.23309e-16	4.19247e-13	7.82199	16.9904	443.366	173.315
780	BraA09g008420.3C	41.007	4.68906	0.9021	5.19794	2.01513e-07	1.73852e-05	5.86649	0	96.2632	61.8982
781	BraA07g026010.3C	127.125	4.6988	0.720793	6.51893	7.08127e-11	1.34205e-08	9.77748	9.06157	423.003	66.6596
782	BraA07g031300.3C	4568.14	4.73748	0.410218	11.5487	7.49594e-31	3.8802e-27	470.297	189.16	11211.9	6401.22
783	BraA07g035660.3C	52.2695	4.79788	0.889248	5.39543	6.83595e-08	6.60179e-06	4.88874	2.26539	163.833	38.0912
784	BraA07g027340.3C	255.436	4.84332	0.554462	8.73517	2.43291e-18	2.03125e-15	19.555	14.7251	761.775	225.69
785	BraA01g003850.3C	46.3793	4.86152	0.958468	5.07218	3.93294e-07	3.13207e-05	4.88874	1.1327	149.023	30.4729
786	BraA09g039040.3C	41.6237	4.89741	0.935877	5.23296	1.66819e-07	1.47864e-05	0	5.66348	102.742	58.089
787	BraA03g027160.3C	289.883	4.90755	0.553015	8.87417	7.04595e-19	6.75419e-16	22.4882	14.7251	873.773	248.545
788	BraA02g018180.3C	36.317	5.06837	0.989382	5.12276	3.01094e-07	2.4506e-05	1.9555	2.26539	95.3376	45.7094
789	BraA02g004310.3C	247.866	5.0991	0.538592	9.46746	2.8673e-21	4.36538e-18	16.6217	11.327	700.685	262.829
790	BraA05g002420.3C	77.5539	5.18718	0.779086	6.65803	2.77519e-11	5.74619e-09	5.86649	2.26539	223.997	78.0869
791	BraA08g023500.3C	42.5309	5.269	0.97112	5.42569	5.7731e-08	5.63847e-06	0	4.53078	102.742	62.8504
792	BraA05g014680.3C	200.806	5.39083	0.606772	8.88444	6.42463e-19	6.39547e-16	11.733	6.79618	594.24	190.456
793	BraA09g035710.3C	601.202	5.48471	1.10993	4.94148	7.75305e-07	5.76622e-05	41.0654	11.327	1807.71	544.704
794	BraA07g016850.3C	98.2161	5.52399	0.728809	7.57948	3.46944e-14	1.20302e-11	4.88874	3.39809	269.352	115.226
795	BraA06g001970.3C	518.637	5.59951	0.491676	11.3886	4.76541e-30	1.79023e-26	32.2657	9.06157	1351.39	681.832
796	BraA01g001510.3C	345.964	5.61424	0.49303	11.3872	4.84183e-30	1.79023e-26	8.79973	19.2558	471.134	884.667
797	BraA07g016090.3C	91.0776	5.61449	0.741002	7.57689	3.53948e-14	1.20538e-11	4.88874	2.26539	229.551	127.605
798	BraA09g052300.3C	38.7652	5.61993	1.09449	5.13474	2.82532e-07	2.33626e-05	2.93324	0	107.37	44.7571
799	BraA03g005540.3C	66.6409	5.6416	0.827425	6.81826	9.21528e-12	2.16827e-09	2.93324	2.26539	149.948	111.417
800	BraA01g018560.3C	570.081	6.5657	0.567722	11.565	6.1996e-31	3.8802e-27	15.644	7.92887	1756.8	499.947
801	BraA09g031610.3C	199.913	6.61265	1.32081	5.0065	5.54285e-07	4.26965e-05	6.84424	1.1327	616.455	175.219
802	BraA02g019470.3C	28.3841	6.74989	1.65239	4.08492	4.40918e-05	0.00205249	0.977748	0	92.5607	19.9979
803	BraA05g003710.3C	89.4309	6.83693	1.03796	6.5869	4.49104e-11	8.87306e-09	2.93324	0	278.608	76.1823
804	BraA07g014470.3C	32.5893	6.95014	1.62582	4.27484	1.91273e-05	0.00101031	0.977748	0	103.668	25.7115
805	BraA07g036060.3C	13.1252	7.08342	1.77096	3.99977	6.34054e-05	0.00269468	0	0	28.6938	23.807
806	BraA10g021110.3C	13.5013	7.12474	1.81136	3.93336	8.37672e-05	0.00335614	0	0	42.5779	11.4274
807	BraA06g018410.3C	41.31	7.28121	1.57677	4.6178	3.87825e-06	0.000250316	0	1.1327	121.255	42.8526
